1  
2  
3  
4  
5  
6  
7  
8  
9  
10  
11  
12  
13  
14  
15  
16  
17  
18  
19  
20  
21  
22  
23  
24  
25  
26  
27  
28  
29  
30  
31  
32  
33  
34

**Sonic hedgehog signaling directs patterned cell remodeling  
during cranial neural tube closure**

Eric R. Brooks<sup>1</sup>, Mohammed T. Islam<sup>1</sup>, Kathryn V. Anderson<sup>2</sup>, and Jennifer A. Zallen<sup>1,3</sup>

<sup>1</sup>Howard Hughes Medical Institute and Developmental Biology Program, Sloan Kettering  
Institute, New York, NY, USA

<sup>2</sup>Developmental Biology Program, Sloan Kettering Institute, New York, NY, USA

<sup>3</sup>**For correspondence:** [zallenj@mskcc.org](mailto:zallenj@mskcc.org)

**Competing interests:** The authors declare that no competing interests exist.

## 35 **Abstract**

36  
37 Neural tube closure defects are a major cause of infant mortality, with exencephaly accounting  
38 for nearly one-third of cases. However, the mechanisms of cranial neural tube closure are not  
39 well understood. Here we show that this process involves a tissue-wide pattern of apical  
40 constriction controlled by Sonic hedgehog (Shh) signaling. Midline cells in the mouse midbrain  
41 neuroepithelium are short with large apical surfaces, whereas lateral cells are taller and undergo  
42 synchronous apical constriction, driving neural fold elevation. Embryos lacking the Shh effector  
43 Gli2 fail to produce appropriate midline cell architecture, whereas embryos with expanded Shh  
44 signaling, including the IFT-A complex mutants *lft122* and *Ttc21b* and embryos expressing  
45 activated Smoothened, display apical constriction defects in lateral cells. Disruption of lateral,  
46 but not midline, cell remodeling results in exencephaly. These results reveal a morphogenetic  
47 program of patterned apical constriction governed by Shh signaling that generates structural  
48 changes in the developing mammalian brain.

49  
50

## 51 **Introduction**

52  
53 Neural tube closure defects are among the most common structural birth defects, occurring in 1  
54 in 1,000 pregnancies worldwide (Wallingford et al., 2013; Zaganjor et al., 2016). During  
55 development, neuroepithelial cells undergo extensive remodeling to transform a flat sheet into a  
56 fully closed tube that gives rise to the brain and spinal cord of the animal. Distinct genetic  
57 circuits are required for neural tube closure in different regions along the head-to-tail axis,  
58 translating positional information into location-appropriate cell behaviors (Wilde et al., 2014; Aw  
59 and Devenport, 2017; Nikolopoulou et al., 2017; Juriloff and Harris, 2018). Although many  
60 studies have focused on mechanisms of neural tube closure in the spinal cord, one-third of  
61 human neural tube defects arise from a failure of closure in the cranial region, resulting in  
62 exencephaly—an inoperable and terminally lethal birth defect (Zaganjor et al., 2016). More than  
63 a hundred genes are specifically required for closure of the mouse cranial neural plate,  
64 suggesting that unique mechanisms promote neural tube closure in the cranial region (Harris  
65 and Juriloff, 2007; Harris and Juriloff, 2010; Wilde et al., 2014). Despite the clinical importance  
66 of this disease, the cellular mechanisms that produce cranial neural tube structure, and how  
67 these cell behaviors are coordinated across thousands of cells to close the massive cranial  
68 region, remain opaque.

69  
70 Tissue-scale structural changes during cranial neural closure require the precise spatial  
71 regulation of cell behaviors along the anterior-posterior and mediolateral axes. However, how  
72 cell behaviors are dynamically patterned along these axes is only beginning to be understood.  
73 The neural plate is significantly wider in the cranial region compared with the spinal cord,  
74 suggesting that distinct strategies may be required for closure of the developing brain. In  
75 addition, positionally regulated signals produce distinct cell fates along the mediolateral axis of  
76 the neural tube. Neuronal identities at different mediolateral positions are regulated by the  
77 secreted Shh, Wnt, and BMP proteins, with high levels of Shh producing ventral cell fates,  
78 moderate levels of Shh producing intermediate cell fates, and high levels of Wnt and BMP  
79 producing dorsal cell fates (McMahon et al., 2003; Dessaud et al., 2008; Sagner and Briscoe,  
80 2019). In the posterior spinal cord, spatially restricted Shh and BMP signaling are required for  
81 local tissue bending, suggesting that these signals can influence tissue structure as well as cell  
82 identity (Ybot-Gonzalez et al., 2002; Ybot-Gonzalez et al., 2007). However, the cell behaviors  
83 that drive cranial neural tube closure and the positional signals that determine where and when  
84 these behaviors occur in the tissue are unknown.

85  
86 Midline cells are essential drivers of neural tube closure in the spinal cord across the chordate  
87 lineage, undergoing cell-shape changes (Burnside and Jacobson, 1968; Smith et al., 1994;  
88 Haigo et al., 2003; Lee et al., 2007; Nishimura and Takeichi, 2008; Nishimura et al., 2012;  
89 McShane et al., 2015) and planar rearrangements (Davidson and Keller, 1999; Wallingford and  
90 Harland, 2002; Williams et al., 2014; Sutherland et al., 2020) that narrow and bend the neural  
91 plate. At later stages of closure, cells at the borders of the neural plate form dynamic protrusions  
92 and adhesions that join the left and right sides of the neural plate to produce a closed tube  
93 (Pyrgaki et al., 2010; Massarwa et al., 2014; Hashimoto et al., 2015; Ray and Niswander,  
94 2016a; Ray and Niswander, 2016b; Molè et al., 2020). However, it is not known if localized  
95 forces at the midline and borders of the neural plate are sufficient for closure of the significantly  
96 larger cranial region, or if distinct cell populations and behaviors contribute to cranial neural  
97 structure.

98  
99 Apical constriction is a highly conserved process that transforms columnar epithelial cells into  
100 wedge shapes through actomyosin-dependent contraction of the apical cell surface and drives  
101 structural changes such as cell ingression, tissue bending, and tissue invagination (Martin and  
102 Goldstein, 2014). In the amphibian neural plate, apical constriction is required to form the

103 median and dorsolateral hinge points, two localized tissue bending events that are a  
104 prerequisite for closure (Burnside and Jacobson, 1968; Burnside, 1973; Haigo et al., 2003; Lee  
105 et al., 2007; Itoh et al., 2014; Ossipova et al., 2014). However, it is not known if apical  
106 constriction contributes to closure in the tightly packed, pseudostratified neuroepithelium of the  
107 mammalian neural plate. In the mouse spinal cord, neural tube closure is independent of  
108 actomyosin activity, suggesting that apical constriction is not required for this process (Ybot-  
109 Gonzalez and Copp, 1999; Escuin et al., 2015). Instead, bending of the developing spinal cord  
110 is proposed to occur through alternative mechanisms such as tissue buckling or cell-cycle-  
111 dependent changes in nuclear position (McShane et al., 2015; Nikolopoulou et al., 2017). By  
112 contrast, regulators of actin and myosin are required for closure of the cranial neural plate,  
113 although the cell behaviors that are controlled by this contractile machinery are unclear  
114 (Morriss-Kay and Tuckett, 1985; Hildebrand and Soriano, 1999; Brouns et al., 2000; McGreevy  
115 et al., 2015). Loss of the actomyosin regulator Shroom3 leads to an increase in apical cell  
116 surface area in the cranial neuroepithelium, consistent with a defect in apical constriction  
117 (McGreevy et al., 2015). However, mammalian cranial neuroepithelial cells also undergo  
118 significant elongation along the apicobasal axis that can decrease the apical surface of cells  
119 independently of apical constriction (Jacobson and Tam, 1982), and several mutants defective  
120 for apicobasal elongation, including *Pten*, *Cfl1*, and *Nuak1/2* mutants, also show an increase in  
121 apical cell area (Ohmura et al., 2012; Grego-Bessa et al., 2015; Grego-Bessa et al., 2016).  
122 Disambiguating the contributions of apical constriction and apicobasal elongation to cranial  
123 closure is challenging, in part due to the difficulty in visualizing individual cell shapes in this  
124 densely packed tissue. Therefore, the cell behaviors that promote cranial neural closure, and  
125 the critical force-generating cell populations that drive these dynamic changes, are unknown.

126  
127 Using high-resolution imaging of cell behavior in the mouse cranial neural plate, we  
128 demonstrate a tissue-wide pattern of apical constriction during neural tube closure in the  
129 developing midbrain. In contrast to the spinal cord, elevation of the cranial neural folds is driven  
130 by the synchronous, sustained apical constriction of a large population of lateral cells, whereas  
131 midline cells remain flat and apically expanded. The loss of *Gli2*, a transcriptional effector of *Shh*  
132 signaling, disrupts cell architecture at the midline, whereas loss of the IFT-A complex  
133 components *Ift122* or *Ttc21b* disrupt apical constriction and actomyosin organization in lateral  
134 cells, resulting in a failure of cranial neural tube closure. These apical remodeling defects are  
135 recapitulated by activation of the *Shh* response throughout the midbrain, indicating that they are  
136 due to deregulated *Shh* signaling. Together, these results demonstrate that lateral cells drive

137 cranial neural tube closure through large-scale, coordinated apical constriction behaviors that  
138 are spatially regulated by patterned Shh activity.

139

140

## 141 **Results**

142

### 143 **Neuroepithelial cells display patterned apical constriction during cranial closure**

144

145 A critical step in the closure of the mouse midbrain is the transformation of the neural plate from  
146 convex to concave (Figure 1A-C) (Nikolopoulou et al., 2017; Vijayraghavan and Davidson,  
147 2017; Juriloff and Harris, 2018). Prior to closure, the cranial neural plate has an open, rams-  
148 horn shape (Figure 1C). The neuroepithelial sheet is convex on either side of the midline, with  
149 the outer edges of the neural plate tucked under the lateral regions. This curvature reverses  
150 during neural fold elevation, when both sides of the neural plate rise up and straighten to  
151 produce a concave, V-shaped structure (Figure 1C). The borders of the neural plate  
152 subsequently bend inward, appose, and fuse at the dorsal midline to produce a closed tube. To  
153 investigate the cell behaviors that drive these structural changes, we used confocal imaging and  
154 semi-automated image segmentation (Mashburn et al., 2012; Farrell et al., 2017) to analyze cell  
155 behavior at single-cell resolution. The apical profiles of midbrain neuroepithelial cells were  
156 relatively homogeneous in area prior to elevation (0 somites, E7.75) (Figure 1D and E).  
157 However, a strong pattern emerged during elevation (6 somites, E8.5). Lateral cells on either  
158 side of the midline displayed a more than 50% decrease in apical area between 0 and 9 somites  
159 (Figure 1F-H, Supplementary File 1). By contrast, the average apical surface area of midline  
160 cells did not change significantly during elevation (Figure 2A-C). Additionally, lateral cells  
161 became progressively mediolaterally oriented during the same period, whereas midline cell  
162 orientation was unchanged (Figure 2-figure supplement 1). These results indicate that lateral  
163 cells, but not midline cells, undergo apical remodeling during cranial neural fold elevation.

164

165 The finding that midline cells in the midbrain do not remodel during neural fold elevation differs  
166 from neural tube closure mechanisms in the spinal cord, in which wedge-shaped midline cells  
167 drive tissue bending (McShane et al., 2015; Schoenwolf and Franks, 1984; Smith et al., 1994;  
168 Smith and Schoenwolf, 1988), and raises the possibility that lateral cells may be key drivers of  
169 elevation. To determine if the apical remodeling of lateral cells is due to apicobasal elongation,  
170 we analyzed cell height in the cranial neural plate at different stages of elevation. Cell height in

171 the lateral and midline regions did not change significantly during early elevation (0-7 somites)  
172 (Figure 3C and D), even though the average apical area of lateral cells decreased by more than  
173 30% during this period (Figure 1G). By contrast, lateral and midline cells elongated more than  
174 60% along the apical-basal axis after the 7-somite stage, such that lateral cells were  
175 consistently taller than midline cells throughout elevation (Figure 3C-E). Thus, cell remodeling in  
176 the elevating midbrain occurs in two phases, with an early phase involving apical remodeling in  
177 the absence of changes in cell height, and a later phase involving apicobasal elongation (Figure  
178 3J). These results indicate that apicobasal elongation in the neuroepithelium occurs at late  
179 stages of elevation, but cannot explain the dramatic structural changes that occur during early  
180 elevation.

181  
182 We next investigated whether apical constriction contributes to early structural changes in the  
183 midbrain neuroepithelium. Consistent with this possibility, the conversion of the midbrain neural  
184 plate from convex to concave is accompanied by a decrease in the apical span of the tissue  
185 without a significant change in the basal span (Figure 3A and B, Figure 3-figure supplement 1A  
186 and B). However, apical constriction has not been directly observed in the pseudostratified  
187 mammalian neural plate, where the crowded packing of cells has been proposed to hinder this  
188 process (Nikolopoulou et al., 2017). To determine if lateral cells undergo apical constriction, we  
189 visualized cell morphology in the midbrain neuroepithelium of embryos expressing membrane-  
190 GFP in a mosaic pattern, using the inefficient EIIA-Cre recombinase to label individual cells  
191 (Figure 3F) (Lakso et al., 1996; Muzumdar et al., 2007). Using this approach, we identified five  
192 classes of lateral cells (Figure 3G). More than half of lateral cells ( $51\pm 6\%$ ) had a highly  
193 constricted apical neck, a hallmark of apical constriction. An additional  $13\pm 2\%$  displayed  
194 properties consistent with apical constriction, but with a shorter neck domain, suggesting that  
195 apical area changes can occur even in the absence of a basal shift in cell volume. The  
196 remaining one-third of lateral cells were apically expanded, spindle-shaped, or columnar.  
197 Because few midline cells were labeled by this method, we used manual segmentation to  
198 investigate cell shape at the midline using antibodies to  $\beta$ -catenin (Figure 3H). In contrast to  
199 lateral cells, midline cells tended to be columnar ( $45\pm 5\%$ ) or apically expanded (30%), with  
200 relatively few midline cells showing apically constricted morphologies ( $17\pm 3\%$ ) (Figure 3I, Figure  
201 3-figure supplement 2A and B). These results directly demonstrate the presence of apical  
202 constriction in the lateral neural plate and reveal a striking regionalization of cell-shape changes  
203 along the mediolateral axis.

204

## 205 **Apical remodeling and cranial neural closure require IFT-A proteins**

206

207 To identify the mechanisms that regulate the distinct behaviors of lateral and midline cells, we  
208 sought to identify mutants that disrupt this pattern. In a genetic screen for mouse mutants with  
209 embryonic defects (García-García et al., 2005), we identified two mutants with severe defects in  
210 cranial neural closure (Figure 4A-C). The mutations in these strains mapped to premature stop  
211 codons in *Ift122* and *Ttc21b* (*Ift139*), which encode components of the conserved intraflagellar  
212 transport A (IFT-A) complex (Figure 4-figure supplement 1A and B). The IFT-A complex directs  
213 the trafficking of structural and signaling proteins in cilia, microtubule-based cellular organelles  
214 that modulate Shh signaling (Wong and Reiter, 2008; Bangs and Anderson, 2017). Consistent  
215 with these functions, mutant embryos from both strains exhibited a reduction in the number of  
216 cilia (Figure 4-figure supplement 1C-E). Mutations in IFT-A complex components have been  
217 shown to cause exencephaly, but how these proteins influence cranial neural closure is not  
218 known (Tran et al., 2008; Cortellino et al., 2009; Murdoch and Copp, 2010; Qin et al., 2011;  
219 Bangs and Anderson, 2017). In contrast to littermate controls, which completed neural fold  
220 elevation, apposition, and fusion in 24 hours, *Ift122* and *Ttc21b* mutants failed to generate V-  
221 shaped neural folds in the midbrain, forebrain, and anterior hindbrain regions of 7-somite  
222 embryos (Figure 4D-F, Figure 4-figure supplements 2 and 3). These defects did not recover  
223 and the cranial neural folds of mutant embryos remained unelevated at all stages analyzed,  
224 leading to highly penetrant exencephaly at E10.5 (Figure 4A-C). Thus, the cranial closure  
225 defects in *Ift122* and *Ttc21b* mutants arise from an early failure in cranial neural fold elevation.

226

227 To determine the cellular basis of these exencephaly defects, we analyzed cell shape in *Ift122*  
228 and *Ttc21b* mutants. Mutant embryos displayed a striking expansion of the apical cell surface in  
229 the lateral midbrain (Figure 4G-I). Lateral cells in *Ift122* and *Ttc21b* mutants displayed a 55%  
230 and 93% increase in average apical cell area, respectively, compared with littermate controls  
231 (Figure 4J-M), as well as altered cell orientation (Figure 4-figure supplement 4). These defects  
232 did not result from reduced cell proliferation, as mutant embryos had a normal frequency and  
233 distribution of mitotic cells along the mediolateral axis, and normal cell density in the underlying  
234 mesenchyme (Figure 4-figure supplements 5 and 6). These results indicate that *Ift122* and  
235 *Ttc21b* are required for cell-shape changes in the lateral midbrain neuroepithelium.

236

237

238

## 239 **IFT-A proteins pattern cell shape and actomyosin contractility**

240  
241 To determine if the global pattern of cell remodeling is affected in IFT-A mutants, we examined  
242 cell-shape changes throughout the entire mediolateral axis of the midbrain in *lft122* and *Ttc21b*  
243 mutants. In wild-type littermate controls, apically expanded cells were present at the midline and  
244 at the outer margins of the tissue. These domains were separated by a broad domain of apically  
245 constricted cells spanning 30-40 cell diameters along the mediolateral axis and more than 60  
246 cells along the anterior-posterior axis, encompassing a region of more than 2,000 lateral cells  
247 on either side of the midline (Figure 5A and F-H). The difference between midline and lateral  
248 populations was eliminated in *lft122* and *Ttc21b* mutants (Figure 5B-E). In mutant embryos,  
249 lateral cells were apically expanded and midline cells were apically constricted compared with  
250 controls, whereas cell shape at the outer margins of the neural plate was independent of IFT-A  
251 activity (Figure 5F-H). Moreover, the difference in height between wild-type midline and lateral  
252 cells was abolished in *lft122* and *Ttc21b* mutants (Figure 5I and J, Figure 5-figure supplement  
253 1A and B). These cell remodeling defects were associated with a failure to fully convert the  
254 cranial region from convex to concave in *lft122* and *Ttc21b* mutants (Figure 5-figure  
255 supplement 1C-F). These results demonstrate that *lft122* and *Ttc21b* are required for patterned  
256 apical remodeling in the midbrain neuroepithelium. In their absence, midline and lateral cells  
257 adopt a uniform cell morphology.

258  
259 A hallmark of apical constriction is the requirement for apically localized actomyosin contractility  
260 (Martin and Goldstein, 2014). To determine if this is the mechanism by which *lft122* and *Ttc21b*  
261 promote apical remodeling in lateral cells, we analyzed the localization of F-actin and the  
262 phosphorylated (active) form of myosin II in *lft122* and *Ttc21b* mutants. Wild-type cranial  
263 neuroepithelial cells display a strong accumulation of F-actin and phosphomyosin at the apical  
264 cell cortex, which is often assembled into mediolaterally oriented actomyosin cables in the chick  
265 and mouse neural plate (Nishimura et al., 2012; McGreevy et al., 2015). In line with these  
266 observations, we observed frequent supracellular cables in the elevating cranial neural plate.  
267 Cables were present at a range of orientations, with a strong mediolateral bias (Figure 6A, B, E,  
268 and F). By contrast, fewer actomyosin cables were present in *lft122* and *Ttc21b* mutants, and  
269 the cables that did form were not consistently oriented with respect to the mediolateral axis  
270 (Figure 6A-F). The ratio of phosphomyosin to F-actin at adherens junctions was also decreased  
271 in *Ttc21b* mutants (Figure 6G and H), consistent with the stronger apical constriction defects in



272 this mutant. These results demonstrate that *Ift122* and *Ttc21b* are required for apical  
273 actomyosin organization in the midbrain neuroepithelium.

274

275

## 276 **Shh signaling organizes patterned apical remodeling**

277

278 Cilia are signaling organelles that are critical for Shh signaling and cell fate. Our finding that cilia  
279 proteins are also required for cell remodeling suggests that fate and morphology may be directly  
280 linked. In the spinal cord, the loss of IFT-A complex function typically results in ligand-  
281 independent activation of Shh signaling and an expansion of Shh-dependent ventral cell fates  
282 (Tran et al., 2008; Cortellino et al., 2009; Qin et al., 2011; Bangs and Anderson, 2017), although  
283 strong disruption of IFT-A function can result in a loss of Shh-dependent cell fates (Liem et al.,  
284 2012). To test whether *Ift122* and *Ttc21b* pattern cell fate during cranial neural fold elevation, we  
285 analyzed the expression of *Nkx6.1*, a target of Shh signaling. In wild-type embryos, *Nkx6.1*  
286 levels were highest at the midline during midbrain neural fold elevation and decreased with  
287 increasing distance from the midline (Figure 7A and B), consistent with results at later stages  
288 (Qiu et al., 1998; Tran et al., 2008; Qin et al., 2011; Tang et al., 2013). In addition, *Nkx6.1* was  
289 expressed at lower levels in the anterior hindbrain, revealing differential regulation along the  
290 anterior-posterior axis (Figure 7A). In *Ift122* and *Ttc21b* mutants, the mediolateral pattern of  
291 *Nkx6.1* expression was abolished, and *Nkx6.1* was expressed at equivalent, intermediate levels  
292 in midline and lateral cells (Figure 7A-C). In addition, the mediolateral extent of the *Nkx6.1*  
293 domain was expanded, reaching all the way to the neural plate borders in *Ift122* and *Ttc21b*  
294 mutants. By contrast, the anterior-posterior pattern of *Nkx6.1* expression was unaffected,  
295 indicating that this axis of Shh regulation is independent of IFT-A activity. These results raise  
296 the possibility that deregulated Shh signaling could underlie the cranial closure defects in *Ift122*  
297 and *Ttc21b* mutants.

298

299 To investigate the role of Shh signaling in midbrain cell remodeling, we examined cell  
300 morphology in mutants lacking the Shh effector *Gli2*, which is required to generate ventral Shh-  
301 dependent cell types (Mo et al., 1997; Matise et al., 1998; Bai et al., 2002; Wong and Reiter  
302 2008; Bangs and Anderson, 2017). Because Shh signaling is normally highest at the midline,  
303 we asked if the unique architecture of midline cells requires *Gli2* function. Consistent with the  
304 effects of *Gli2* at later stages, *Gli2* mutants failed to establish ventral cell fates in the elevating  
305 midbrain, including *FoxA2* expression in the floor plate, indicating that *Gli2* is required for

306 midline cell identity (Figure 8-figure supplement 1). Midline cells in *Gli2* mutants had a  
307 significant decrease in apical area compared with wild type (Figure 8D-F). In addition, midline  
308 cells in *Gli2* mutants were significantly taller than in wild-type controls (Figure 8G and H). By  
309 contrast, lateral cell morphology was unaffected in *Gli2* mutants (Figure 8A-C, G, and H), and  
310 no defects in cell orientation were observed in either region (Figure 8-figure supplement 2).  
311 These data demonstrate that *Gli2* activity is necessary for the short, apically expanded  
312 architecture of midline cells but not for apical constriction in lateral cells. Despite these severe  
313 midline defects, *Gli2* mutants complete closure normally in both cranial and spinal regions (Mo  
314 et al., 1997; Matise et al., 1998; Bai et al., 2002), indicating that the specialized architecture of  
315 midline cells is dispensable for cranial neural tube closure.

316  
317 Because cranial neural tube closure occurs normally in the absence of proper midline  
318 morphology, we hypothesized that a failure of apical constriction in lateral cells could be  
319 responsible for the cranial closure defects in *Ift122* and *Ttc21b* mutants. In addition, the  
320 expanded *Nkx6.1* expression in *Ift122* and *Ttc21b* mutants raises the possibility that increased  
321 *Shh* signaling in lateral cells could underlie the defects in apical constriction. To test these  
322 hypotheses, we investigated whether spatially restricted *Shh* signaling is required for apical  
323 constriction and cranial neural closure. We ectopically activated the *Shh* signaling response  
324 throughout the midbrain by expressing a constitutively active variant of the *Shh* receptor  
325 Smoothened (*SmoM2*) (Jeong et al., 2004) using *Wnt1-Cre2* (Lewis et al., 2013). *SmoM2*-  
326 expressing embryos have expanded *Nkx6.1* expression throughout the midbrain, consistent with  
327 uniform activation of the *Shh* response (Figure 9C and D). *SmoM2* expression did not affect cell  
328 proliferation or cell orientation (Figure 9-figure supplements 1 and 2). However, *SmoM2*  
329 expression resulted in a 50% increase in apical area in lateral cells (Figure 9G-I), similar to the  
330 defects in *Ift122* mutants, but less severe than the defects in *Ttc21b* mutants. The effects of  
331 *SmoM2* were localized, as cells that did not express *Wnt1-Cre2* apically constricted normally,  
332 suggesting that activated *SmoM2* acts cell autonomously to regulate cell shape (Figure 9E and  
333 F). *SmoM2*-expressing embryos did not display morphological defects at the midline, perhaps  
334 because Smoothened activation did not further enhance the already high *Shh* response in this  
335 region (Figure 9G, J and K). Notably, *SmoM2*-expressing embryos exhibited 100% penetrant  
336 exencephaly (12/12 *SmoM2*-expressing embryos compared with 0/13 littermate controls)  
337 (Figure 9A and B). These results demonstrate that disruption of apical constriction in lateral cells  
338 alone—in the absence of structural changes at the midline—is sufficient to prevent cranial  
339 neural closure. Thus, patterned *Shh* signaling in the midbrain neuroepithelium is required for

340 spatially regulated apical remodeling events that drive cranial neural closure, and dysregulation  
341 of Shh activity leads to altered cell remodeling and exencephaly (Figure 9L and M).

342

## 343 **Discussion**

344

345 Neural tube closure defects are among the most common human birth defects, with one-third of  
346 cases arising from defects in closure of the cranial region (Zaganjor et al., 2016). However, the  
347 mechanisms that convert the large cranial neural plate region from convex to concave during  
348 neural tube closure have long been obscure. Here we show that elevation is driven by a tissue-  
349 scale pattern of apical cell remodeling in the mouse midbrain in which thousands of lateral cells  
350 undergo synchronous, sustained apical constriction, whereas midline cells remain apically  
351 expanded. Spatiotemporally regulated cell remodeling in this system requires patterned Shh  
352 signaling. Loss of the Shh effector *Gli2* results in a failure to establish the short and flat  
353 morphology of cells at the midline, but does not prevent neural tube closure. By contrast,  
354 expansion of Shh signaling into the lateral neural plate, either in IFT-A mutants that impair cilia-  
355 dependent Shh regulation or in embryos that express activated Smoothed throughout the  
356 midbrain neuroepithelium, leads to a disruption of apical constriction in lateral cells and results  
357 in highly penetrant exencephaly. These results reveal a program of positionally encoded cell  
358 behavior that is essential for neural tube closure in the developing midbrain and identify Shh as  
359 a critical regulator of coordinated cell remodeling in the mammalian cranial neural plate.

360

361 Lateral cells that undergo apical constriction and midline cells that do not are distinguished by  
362 their distance from the source of the Shh signal, as the Shh response is normally high at the  
363 midline and diminished laterally (Qiu et al., 1998; Sagner and Briscoe, 2019; Tang et al., 2013).  
364 The morphological changes in embryos with a reduced or expanded response to Shh signaling  
365 are consistent with a model in which high levels of Shh signaling induce short, apically  
366 expanded cells, whereas low levels of Shh signaling are associated with tall, apically constricted  
367 cells. *Gli2* mutants that disrupt specific aspects of Shh signaling are defective for cell-shape  
368 changes in midline cells where Shh signaling is normally high (Figure 9L and M). By contrast, in  
369 *SmoM2*-expressing embryos that have aberrantly high Shh signaling throughout the midbrain,  
370 midline morphology is normal, but lateral cells fail to apically constrict. IFT-A mutants that have  
371 a uniform, intermediate level of Shh signaling throughout the midbrain display equivalent cell  
372 morphologies in both regions. These results are consistent with a model in which different levels  
373 of Shh signaling induce different cell shapes in the midbrain neuroepithelium, with high levels of

374 Shh signaling inhibiting apical remodeling and apicobasal cell elongation at the midline, and low  
375 levels of Shh signaling allowing apical constriction in lateral cells. Thus, Shh not only determines  
376 the pattern of cell fates in the tissue, but is also essential for the organized cell behaviors that  
377 establish tissue structure. These dual functions of Shh provide a single source of positional  
378 information that regulates both cell identity and cell morphology, linking tissue pattern to tissue  
379 structure.

380  
381 Apical constriction is a potent and conserved mechanism for generating changes in cell shape  
382 (Martin and Goldstein, 2014). During morphogenesis, apical constriction in a narrow or spatially  
383 delimited domain promotes localized tissue bending or invagination, as in *Drosophila* ventral  
384 furrow formation (Ko and Martin, 2020), *C. elegans* gastrulation (Lee and Goldstein, 2003; Lee  
385 et al., 2006), *Xenopus* blastopore invagination (Keller, 1981; Lee and Harland, 2007; Lee and  
386 Harland, 2010), and hinge point formation in the vertebrate spinal cord (Haigo et al., 2003; Lee  
387 et al., 2007; Vijayraghavan and Davidson, 2017). By contrast, we show that widespread apical  
388 constriction events are coordinated across thousands of cells in the developing midbrain,  
389 resulting in a large-scale change in the curvature of the elevating neural plate. Coordinated  
390 apical constriction in large cell populations has been observed in tissues that undergo a  
391 dramatic change or even an inversion of tissue curvature, such as in the mouse lens placode,  
392 which transitions from flat to spherical (Plageman et al., 2010), and in colonies of adherent  
393 unicellular choanoflagellates undergoing light-dependent curvature inversion (Brunet et al.,  
394 2019). Thus, coordinated constriction among hundreds to thousands of cells may represent an  
395 evolutionarily conserved mechanism for collectively promoting large-scale curvature changes in  
396 multicellular tissues.

397  
398 The cell-shape defects caused by an expanded Shh response in IFT-A mutants suggest a  
399 unifying hypothesis for the cranial closure defects in mutants with deregulated Shh signaling  
400 (Murdoch and Copp, 2010), including mutants that affect cilia structure (Liem et al., 2012),  
401 transducers of the Shh signal such as Gli3 and Sufu (Hui and Joyner, 1993; Svärd et al., 2006),  
402 and negative regulators of the Shh response (Ikeda et al., 2001; Cameron et al., 2009; Norman  
403 et al., 2009; Patterson et al., 2009). Expanded Shh signaling could inhibit apical constriction  
404 through a canonical signaling pathway involving Gli2- and Gli3-mediated transcriptional changes  
405 (Dessaud et al., 2008; Kicheva and Briscoe, 2015; Bangs and Anderson, 2017; Sagner and  
406 Briscoe, 2019), possibly involving repression of the BMP inhibitor Noggin, which promotes  
407 tissue bending in the spinal cord (Ybot-Gonzalez et al., 2002; Ybot-Gonzalez et al., 2007; Eom

408 et al., 2011). Consistent with this possibility, the loss of Noggin has been shown to cause  
409 exencephaly (Stottmann et al., 2006). Alternatively, Shh could regulate cell shape through a  
410 noncanonical signaling pathway (Robbins et al., 2012; de la Roche et al., 2013; Zuñiga and  
411 Stoeckli, 2017). Elucidation of these effector pathways will reveal how cell morphology and cell  
412 fate are coordinately regulated in response to the Shh signal.

413

414 Shh signaling has long been recognized to play an important role in controlling positional cell  
415 fates in many developing organs, including the limb, the gut, and the spinal cord (Jessell, 2000;  
416 Villavicencio et al., 2000; McMahon et al., 2003; McGlinn and Tabin, 2006; Tickle and Towers,  
417 2017; Sagner and Briscoe, 2019). Although the effects of Shh on cell behavior have received  
418 comparatively less attention, Shh has been shown to influence axon guidance (Zuñiga and  
419 Stoeckli, 2017), cell migration (Gordon et al., 2018), mesenchymal cell clustering (Rao-Bhatia et  
420 al., 2020), and epithelial remodeling in mice, chicks, frogs, and flies (Corrigall et al., 2007;  
421 Escudero et al., 2007; Nasr et al., 2019; Arraf et al., 2020). Depending on the context, proteins  
422 in the Shh family can have contrasting effects on epithelial cell behavior, promoting apical  
423 constriction in the *Drosophila* eye (Corrigall et al., 2007; Escudero et al., 2007), generating short  
424 and flat cells in the neural tube (Fournier-Thibault et al., 2009 and this work), and inducing tall,  
425 pseudostratified cells in the chick coelomic cavity (Arraf et al., 2020). An understanding of the  
426 mechanisms by which Shh signaling directs cell morphology will provide insight into how this  
427 conserved, positionally encoded molecular mechanism coordinates cell fate with three-  
428 dimensional tissue structure.

429

430 **Materials and Methods**  
 431  
 432

| <b>Key Resources Table</b>                |                              |                                         |                                                                                                                         |                               |
|-------------------------------------------|------------------------------|-----------------------------------------|-------------------------------------------------------------------------------------------------------------------------|-------------------------------|
| <b>Reagent type (species) or resource</b> | <b>Designation</b>           | <b>Source or reference</b>              | <b>Identifiers</b>                                                                                                      | <b>Additional information</b> |
| Genetic reagent ( <i>Mus musculus</i> )   | FVB/NJ                       | Jackson Laboratory                      | stock no. 001800<br>RRID:IMSR_JAX:001800                                                                                |                               |
| Genetic reagent ( <i>Mus musculus</i> )   | <i>lftt122<sup>TR2</sup></i> | This study                              |                                                                                                                         | FVB/N background              |
| Genetic reagent ( <i>Mus musculus</i> )   | <i>Ttc21b<sup>TF2</sup></i>  | This study                              |                                                                                                                         | FVB/N background              |
| Genetic reagent ( <i>Mus musculus</i> )   | SmoM2                        | Jackson Laboratory (Jeong et al., 2004) | <i>Gt(ROSA)26Sor<sup>tm1(Smo/EYFP)</sup><sub>Amc/J</sub></i><br>stock no. 005130<br>MGI:3576373<br>RRID:IMSR_JAX:005130 | C57BL/6J background           |
| Genetic reagent ( <i>Mus musculus</i> )   | <i>Wnt1-Cre2</i>             | Jackson Laboratory (Lewis et al., 2013) | <i>E2f1<sup>Tg(Wnt1-cre)2Sor/J</sup></i><br>stock no. 022137<br>MGI:5485027<br>RRID:IMSR_JAX:022137                     | FVB/N background              |
| Genetic reagent ( <i>Mus musculus</i> )   | EIIA-Cre                     | Jackson Laboratory (Lasko et al., 1996) | <i>Tg(EIIa-cre)C5379Lmgd/J</i><br>stock no. 003314<br>MGI:2137691<br>RRID:IMSR_JAX:003314                               | FVB/N background              |

|                                         |                                             |                                             |                                                                                                                         |                  |
|-----------------------------------------|---------------------------------------------|---------------------------------------------|-------------------------------------------------------------------------------------------------------------------------|------------------|
| Genetic reagent ( <i>Mus musculus</i> ) | <i>mT/mG</i>                                | Jackson Laboratory (Muzumdar et al., 2007)  | <i>Gt(ROSA)26Sor<sup>tm4</sup>(ACTB-tdTomato,-EGFP)Luo/J</i><br>stock no. 007676<br>MGI:3716464<br>RRID:IMSR_JAX:007676 | FVB/N background |
| Genetic reagent ( <i>Mus musculus</i> ) | <i>Gli2<sup>lzki</sup></i>                  | Jackson Laboratory (Bai et al., 2001)       | <i>Gli2<sup>tm2.1Alj</sup>/J</i><br>stock no. 007922<br>MGI:3815004<br>RRID:IMSR_JAX:007922                             | SWR/J background |
| Antibody                                | anti-ZO-1 (rat monoclonal)                  | Developmental Studies Hybridoma Bank (DSHB) | R26.4C<br>RRID:AB_2205518                                                                                               | (1:100)          |
| Antibody                                | anti-phospho-Histone H3 (rabbit polyclonal) | Upstate                                     | 06-570<br>RRID:AB_310177                                                                                                | (1:1,000)        |
| Antibody                                | anti-Arl13b (rabbit polyclonal)             | Caspary et al., 2007                        |                                                                                                                         | (1:1,000)        |
| Antibody                                | anti- $\beta$ -catenin (mouse monoclonal)   | BD                                          | 610153<br>RRID:AB_397554                                                                                                | (1:300)          |
| Antibody                                | anti-laminin (rabbit polyclonal)            | Sigma                                       | L9393<br>RRID:AB_477163                                                                                                 | (1:1,000)        |
| Antibody                                | anti-N-cadherin (rabbit monoclonal)         | Cell Signaling Technology                   | D4R1H<br>RRID:AB_2687616                                                                                                | (1:500)          |

|                        |                                                                     |                           |                              |                                                                                                                                                                                   |
|------------------------|---------------------------------------------------------------------|---------------------------|------------------------------|-----------------------------------------------------------------------------------------------------------------------------------------------------------------------------------|
| Antibody               | anti-GFP<br>(chicken polyclonal)                                    | abcam                     | ab13970<br>RRID:AB_300798    | (1:1,000)                                                                                                                                                                         |
| Antibody               | anti-Nkx6.1<br>(mouse monoclonal)                                   | DSHB                      | F55A10<br>RRID:AB_532378     | (1:50)                                                                                                                                                                            |
| Antibody               | anti-diphospho myosin regulatory light chain<br>(rabbit polyclonal) | Cell Signaling Technology | 3674<br>RRID:AB_2147464      | (1:100)                                                                                                                                                                           |
| Antibody               | anti-FoxA2<br>(rabbit monoclonal)                                   | abcam                     | ab108422<br>RRID:AB_11157157 | (1:1,000)                                                                                                                                                                         |
| Sequence-based reagent | lft122(TR2)_F                                                       | This study                | PCR primer                   | CTGGTTGT<br>AATCTGAC<br>TCGTTGA<br><br>After amplification with below reverse primer, product is digested with HpyCH4III, resulting in a 133 bp WT band and a 118 bp mutant band. |
| Sequence-based reagent | lft122(TR2)_R                                                       | This study                | PCR primer                   | ACTCCCAA<br>GCAAGCGA<br>ACT                                                                                                                                                       |
| Sequence-based reagent | Ttc21b(TF2)_F                                                       | This study                | PCR primer                   | AGAATGAT<br>GTGCAACC<br>TTGTTGA                                                                                                                                                   |



|                        |                          |                                                   |                 |                                                                                                                                        |
|------------------------|--------------------------|---------------------------------------------------|-----------------|----------------------------------------------------------------------------------------------------------------------------------------|
|                        |                          |                                                   |                 | After amplification with below reverse primer, product is digested with NmuCl, resulting in a 224 bp WT band and a 168 bp mutant band. |
| Sequence-based reagent | Ttc21b(TF2)_R            | This study                                        | PCR primer      | TTATCTGG<br>CTCACGGT<br>CTCC                                                                                                           |
| Software, algorithm    | SeedWater Segmenter      | Mashburn et al., 2012                             |                 |                                                                                                                                        |
| Software, algorithm    | SEGGA                    | Farrell et al., 2017                              |                 |                                                                                                                                        |
| Software, algorithm    | FIJI/ImageJ              | Schindelin et al., 2012<br>Schneider et al., 2012 | RRID:SCR_002285 |                                                                                                                                        |
| Software, algorithm    | MorphoLibJ (FIJI plugin) | Legland et al., 2016                              |                 |                                                                                                                                        |
| Software, algorithm    | ITK-SNAP                 | Yushkevich et al., 2006                           | RRID:SCR_002010 |                                                                                                                                        |
| Software, algorithm    | R                        | R Core Team, 2020                                 | RRID:SCR_001905 |                                                                                                                                        |

|                     |                         |                             |                 |  |
|---------------------|-------------------------|-----------------------------|-----------------|--|
| Software, algorithm | Circular plugin (for R) | Agonstinelli and Lund, 2017 |                 |  |
| Software, algorithm | Prism                   | Graphpad                    | RRID:SCR_002798 |  |
| Software, algorithm | Zen                     | Zeiss                       | RRID:SCR_018163 |  |
| Software, algorithm | LAS X                   | Leica                       | RRID:SCR_013673 |  |
| Software, algorithm | EOS Utility             | Canon                       |                 |  |
| Software, algorithm | Illustrator             | Adobe                       | RRID:SCR_010279 |  |

433

434

#### 435 **Mouse strains**

436 The *Ift122<sup>TR2</sup>* and *Ttc21b<sup>TF2</sup>* alleles were identified in an ongoing forward genetic screen (García-  
437 García et al., 2005). The *Ift122<sup>TR2</sup>* mutation was mapped to a single C to A mutation at position  
438 115,899,529 on chromosome 6, resulting in a premature stop codon that is predicted to truncate  
439 the protein at amino acid 575 (out of 1,138). The *Ttc21b<sup>TF2</sup>* allele was mapped to a single C to A  
440 mutation at position 66,242,780 on chromosome 2, resulting in a premature stop codon that is  
441 predicted to truncate the protein at amino acid position 187 (out of 1,315). Both alleles created a  
442 new restriction site. The presence of the *Ift122<sup>TR2</sup>* allele was genotyped by PCR amplification  
443 with the primers TR2F 5' CTGGTTGTAATCTGACTCGTTGA 3' and TR2R 5'  
444 ACTCCAAGCAAGCGAACT 3' followed by restriction digest with HpyCH4III (New England  
445 Biolabs). The presence of the *Ttc21b<sup>TF2</sup>* allele was genotyped by PCR amplification with the  
446 primers TF2F 5' AGAATGATGTGCAACCTTGTTGA 3' and TF2R 5'  
447 TTATCTGGCTCACGGTCTCC 3' followed by restriction digest with NmuCI (ThermoFisher  
448 Scientific). The following previously described mouse strains were used in this study: Wnt1-  
449 Cre2 [Tg(Wnt1-cre)2Sor] (Lewis et al., 2013), EIIA-Cre [Tg(EIIA-Cre)C5379Lmgd/J] (Lakso et  
450 al., 1996), mT/mG [Gt(ROSA)26Sortm4(ACTB-tdTomato,-EGFP)Luo/J] (Muzumdar et al.,

451 2007), SmoM2 [Gt(ROSA)26Sortm1(Smo/YFP)Amc/J] (Jeong et al., 2004), and Gli2  
452 [Gli2<sup>tm2.1Alj</sup>/J] (Bai et al., 2001). All lines were maintained in an FVB/N background except  
453 SmoM2, which was maintained in a C57BL/6J background, and *Gli2*, which was maintained on  
454 a SWR/J background. Timed pregnant mice were euthanized at E7.5-E12.5. Noon on the day of  
455 the vaginal plug was considered E0.5 and embryos were staged by counting the number of  
456 somites. Analysis of wild-type embryos in Figures 1-3 and associated supplements was  
457 performed on FVB/N embryos. Control embryos were wild-type and heterozygous littermate  
458 controls of *Ift122*, *Ttc21b*, and *Gli2* mutants (designated WT in the corresponding figures), or  
459 embryos bearing *Wnt1-Cre2* or SmoM2 alone (designated control in Figure 9 and Figure 9-  
460 figure supplements 1 and 2). The presence or absence of exencephaly was analyzed in E10.5-  
461 E12.5 embryos. Mutant and transgenic embryos were processed in parallel with littermate  
462 controls.

463

#### 464 **Whole-mount immunostaining**

465 Embryos were dissected in ice-cold PBS and fixed overnight at 4°C in 4-8% paraformaldehyde  
466 (PFA, Electron Microscopy Sciences) or Dent's fixative (4:1 methanol:DMSO). Embryos fixed in  
467 Dent's fixative were rehydrated in successive 30 min washes of 75:25, 50:50, and 25:75  
468 methanol:PBS at room temperature (RT). Rehydrated embryos were then washed 3 x 30 min in  
469 PBS + 0.1% TritonX100 (PBTrition) at RT. Embryos were then incubated in blocking solution  
470 (PBS + 3% BSA, 0.1% TritonX100) for 1 h at room temperature. Embryos were then incubated  
471 in staining solution (PBS + 1.5% BSA, 0.1% TritonX100) containing primary antibodies  
472 overnight at 4°C. Embryos were then washed 3 x 30 min in PBTrition and incubated in staining  
473 solution containing Alexa Fluor conjugated secondary antibodies (1:500, ThermoFisher) for 1 h  
474 at room temperature. Embryos were subsequently washed 3 x 30 min in PBTrition at RT and  
475 stored in PBTrition at 4°C until imaging. Antibodies used for embryos fixed in Dent's fixative  
476 were: rat anti-ZO-1 (DSHB R26.4C, 1:100), rabbit anti-Arl13b (Caspary et al., 2007) (1:1,000),  
477 rabbit anti-phosphohistone H3 (Upstate 06-570, 1:1,000), and mouse anti- $\beta$ -catenin (BD  
478 Biosciences 610153, 1:300). Antibodies used for embryos fixed in 4% PFA were rabbit anti-  
479 laminin (Sigma L9393, 1:1,000), rabbit anti-N-cadherin (Cell Signaling Technology D4R1H,  
480 1:500), chicken anti-GFP (abcam ab13970, 1:1,000), mouse anti- $\beta$ -catenin (BD Biosciences  
481 610153, 1:300), mouse anti-Nkx6.1 (DSHB F55A10, 1:50), and rabbit anti-FoxA2 (abcam  
482 ab108422, 1:1,000). Embryos fixed in 8% PFA were stained with rabbit anti-diphosphomyosin  
483 regulatory light chain antibody (Cell Signaling Technology 3674, 1:100). Alexa 546-conjugated  
484 phalloidin (Molecular Probes), and DAPI (ThermoFisher) were used as counterstains.

485

## 486 **Cryosectioning**

487 Embryos were dissected and fixed in 4% PFA for 2 h at room temperature and then washed 5 x  
488 30 min in PBTrition. Embryos were then transferred into 15% sucrose for 30 min and  
489 subsequently into 30% sucrose overnight at 4°C. Embryos were then placed anterior down in a  
490 cryoblock in OCT (Tissue-Tek) and frozen on dry ice. Embryos were stored at -80°C until  
491 sectioning. Embryos were sectioned on a cryostat (Leica) from anterior to posterior in 14 µm  
492 sections, with sections adsorbed onto Superfrost slides (Fisher). Cryosections from the  
493 midbrain/hindbrain region were then washed 3 x 15 min in PBTrition at RT, blocked for 30 min in  
494 blocking solution (see above), stained for 30 min with primary antibodies as above, washed 3 x  
495 15 min in PBTrition, incubated with secondary antibodies, and washed 3 x 15 min in PBTrition.  
496 Stained sections were then mounted under a coverglass in fluorescence mounting media  
497 (Dako).

498

## 499 **Microscopy**

500 For whole-mount confocal analysis, stained embryos were mounted dorsal side down in  
501 PBTrition in Attofluor cell chambers (ThermoFisher A7816), using a small fragment of broken  
502 coverglass with small dabs of vacuum grease (Dow Corning) to mount the embryo on a #1.5  
503 coverglass (Dow Corning). Embryos were then imaged by inverted confocal microscopy on  
504 either a Zeiss LSM700 equipped with a Plan-NeoFluar 40x/1.3 oil immersion objective, or a  
505 Leica SP8 equipped with a HC PL Apo 40x/1.3 oil immersion objective. Images were captured  
506 by tile-based acquisition of contiguous z-stacks of 50-150 µm depth with 0.9-1.2 µm optical  
507 slices and 0.3-0.5 µm z-steps. Tiled images were computationally stitched together with 10%  
508 overlap per tile using Zen (Zeiss) or LAS-X (Leica) software, resulting in visible seams in some  
509 images. Maximum-intensity projections of the entire z depth were created for analysis in the  
510 same software. For confocal imaging of cryosections, slides were imaged on an inverted Zeiss  
511 LSM700 equipped with a Plan-Apochromat 20x/0.8 air objective. Z-stacks of 10-14 µm depth  
512 were imaged with 1.8-2.0 µm optical slices and 1.0-1.2 µm z-steps. For bright-field imaging,  
513 embryos were imaged in PBTrition on a Zeiss Stemi 508 stereomicroscope equipped with a  
514 Canon EOS DSLR camera and EOS Utility software (Canon).

515

## 516 **Image analysis and quantification**

517 Apical area was measured in 100 µm x 100 µm regions in maximum-intensity projections of tiled  
518 images, either at the midline or in a pair of regions on either side of the midline, approximately

519 midway between the midline and the lateral extent of the neural plate and midway between the  
520 pre-otic sulcus and the cranial flexure. For the analysis of cell area throughout the mediolateral  
521 axis, a continuous series of 100  $\mu\text{m}$  (anterior-posterior) x 20  $\mu\text{m}$  (mediolateral) regions from the  
522 midline to the lateral edge were analyzed. Cells contained entirely within these regions were  
523 segmented using SeedWater Segmenter software (Mashburn et al., 2012). Cell areas were  
524 quantified and area maps were generated using the MorphoLibJ plugin (Legland et al., 2016) in  
525 the FIJI redistribution of ImageJ (Schindelin et al., 2012; Schneider et al., 2012). Cell orientation  
526 was evaluated in the same regions using SEGGA software (Farrell et al., 2017). Cells were  
527 assigned a mediolateral orientation if they were oriented at 0-45° with respect to the  
528 mediolateral axis or an anterior-posterior orientation if they were oriented at 45-90°. Cell height  
529 was measured in cryosections by drawing a perpendicular line in FIJI from the apical to the  
530 basal surface between two apparent cell edges using phalloidin and laminin or  $\beta$ -catenin (Figure  
531 3C-E), or in XZ-reconstructions of embryos stained with phalloidin (Figure 8G and H). The ratio  
532 of the apical span to the basal span of the tissue was calculated by manually drawing  
533 segmented lines in FIJI from one lateral extreme of the neural plate to the other in cryosections.

534  
535 Three-dimensional lateral cell shapes were analyzed using the 3D Project tool in FIJI in cells  
536 labeled by EIIA-Cre-driven mosaic recombination of the mT/mG locus, which frequently resulted  
537 in individually labeled cells. Cells throughout the lateral midbrain region were analyzed and were  
538 manually assigned to shape categories based on examination of their apical, mid- and basal  
539 cross-sectional areas. Cells were considered apically constricted if their apical surface was  
540 smaller than their basal surface. EIIA-Cre produced little to no labeling in the midline, and  
541 midline cell 3D analysis was performed by manual segmentation of cells labeled with  $\beta$ -catenin  
542 using ITK-SNAP software (Yushkevich et al., 2006). Comparison of apical and basal areas of  
543 midline cells was performed in FIJI.

544  
545 For analysis of cell proliferation, the percentage of phosphohistone H3-positive cells was  
546 calculated in contiguous 100  $\mu\text{m}$  x 100  $\mu\text{m}$  regions along the mediolateral axis (Figure 4—figure  
547 supplement 5) or in a single 100  $\mu\text{m}$  x 100  $\mu\text{m}$  region midway between the midline and the  
548 lateral edge of the tissue (Figure 9—figure supplement 1). Mesenchymal cell density was  
549 calculated by counting the number of individual DAPI-labeled nuclei in a 50  $\mu\text{m}$  x 100  $\mu\text{m}$  region  
550 in transverse sections.

551

552 The number and angle of multicellular F-actin and phosphomyosin cables were analyzed  
553 manually using FIJI in a pair of 100  $\mu\text{m}$  x 100  $\mu\text{m}$  lateral regions on either side of the midline in  
554 each embryo. A cable was defined as three or more consecutive edges of high-intensity signal  
555 with no gap or diminishment along its length. Apical F-actin and phosphomyosin intensity were  
556 analyzed in 50 cells in a 50  $\mu\text{m}$  x 50  $\mu\text{m}$  lateral region in embryos stained for phalloidin (F-actin)  
557 and phosphorylated myosin II by calculating the mean intensity of a line drawn along the entire  
558 apical cortex of each cell. All intensity quantifications were performed on unprocessed maximum  
559 intensity projections.

560

### 561 **Statistics and figure assembly**

562 Statistical analyses and graph generation were performed in Prism software (Graphpad) or with  
563 the circular plugin (Agostinelli and Lund, 2017) in the R software package (R Core Team, 2020).  
564 All results are reported as mean  $\pm$  standard deviation (SD). Summary significance levels are as  
565 follows: \*\*\*  $p < 0.001$ , \*\*  $p < 0.01$ , \*  $p < 0.05$ . Statistical tests were Welch's t-test, which does not  
566 assume equal SDs between conditions, the Kolmogorov-Smirnov test for comparing  
567 distributions, the standard one-way ANOVA with Tukey's multiple comparisons, which was used  
568 when the variance between replicates was expected to come only from measurement error, the  
569 Brown-Forsythe and Welch one-way ANOVA using Dunnett's T3 multiple comparisons test,  
570 which does not assume equal SDs between conditions, the two-way ANOVA with Sidak's  
571 multiple comparisons for comparing multiple conditions, and the Watson nonparametric two-  
572 sample test for homogeneity for examining circular distributions. Details of the statistical tests, n  
573 values, and p values for each experiment can be found in Supplementary File 1. Figures were  
574 assembled using Photoshop and Illustrator (Adobe). For display purposes, some plots did not  
575 show cells outside the x-axis range, which were generally  $< 2\%$  of cells, except in Figure 5D  
576 ( $< 4\%$  of cells excluded) and Figure 9K ( $< 8\%$  of cells excluded). All cells were included in the  
577 statistical analysis. Each embryo was considered a biological replicate. Formal power analyses  
578 were not conducted. For mutant analyses, in which mutant embryos were compared with stage-  
579 matched littermate controls, an n of 3-5 embryos per genotype was targeted.

580

### 581 **Acknowledgments**

582 The authors thank Heather Alcorn for identifying and mapping the *Ift122*<sup>TR2</sup> and *Ttc21b*<sup>TF2</sup>  
583 alleles, Alex Joyner for helpful discussions and for the *Gli2*<sup>Izki</sup> mice, Ann Sutherland for  
584 introducing ERB and JAZ to the mouse neural plate, Ian Prudhomme for technical assistance,  
585 and Marissa Gredler, Matthew Schilling, Masako Tamada, and Richard Zallen for comments on

586 the manuscript. This work was supported by NIH/NINDS F32 fellowship NS098832 to ERB and  
587 MSKCC Cancer Center Support Grant P30 CA008748. JAZ is an investigator of the Howard  
588 Hughes Medical Institute.

589

## 590 **Ethics**

591 Animal experimentation: All animal experiments were conducted in accordance with the Guide  
592 for the Care and Use of Laboratory Animals of the National Institutes of Health and an approved  
593 Institutional Animal Care and Use Committee (IACUC) protocol (15-08-13) of Memorial Sloan  
594 Kettering Cancer Center.

595

596

## 597 **Figure Legends**

598

### 599 **Figure 1. Lateral cells undergo apical remodeling during cranial neural fold elevation. (A)**

600 Schematic lateral view of the E8.5 neural plate showing the midbrain and anterior hindbrain  
601 region in green. **(B)** Schematic *en face* view of the midbrain and anterior hindbrain region. **(C)**  
602 Schematic cross-sectional views of the cranial neural plate during elevation. **(D)** Tiled confocal  
603 images of embryos at 0 somites (E7.75) and 6 somites (E8.5) labeled with ZO-1. Midline in  
604 center. Arrowhead, pre-otic sulcus. Brackets, regions shown in **(E)**. **(E)** Midbrain cells color-  
605 coded by apical area. Boxes, regions shown in **(F)**. **(F)** Lateral cells at progressive stages of  
606 neural fold elevation. Cells are labeled with ZO-1 (top) and are color-coded by apical area  
607 (bottom). **(G,H)** Average apical cell area **(G)** and apical area distributions **(H)** of lateral cells  
608 during midbrain neural fold elevation. A single value was obtained for each embryo and the  
609 mean $\pm$ SD between embryos is shown, n = 3-6 embryos/stage, \*\*p<0.01, \*\*\*p<0.001 (one-way  
610 ANOVA test). See Supplementary File 1 for n and p values. Anterior up in **(D-F)**. Bars, 100  $\mu$ m  
611 **(D,E)**, 20  $\mu$ m **(F)**.

612

### 613 **Figure 2. Midline cells do not undergo apical remodeling during cranial neural fold**

614 **elevation. (A)** Midline cells at progressive stages of neural fold elevation. Cells are labeled with  
615 ZO-1 (top) and are color-coded by apical area (bottom). **(B,C)** Average apical cell area **(B)** and  
616 apical area distributions **(C)** of midline cells during midbrain neural fold elevation. A single value  
617 was obtained for each embryo and the mean $\pm$ SD between embryos is shown, n = 3  
618 embryos/stage, no significant differences (one-way ANOVA test). See Supplementary File 1 for  
619 n and p values. Anterior up. Bar, 20  $\mu$ m.

620

621 **Figure 3. Lateral cells, but not midline cells, apically constrict.** (A) Transverse sections of  
622 the cranial neural plate. Phalloidin and laminin show the apical and basal surfaces of the  
623 neuroepithelium, respectively. (B) The ratio of the apical span to the basal span of the neural  
624 plate decreases during elevation, flipping the cranial neural plate from convex ( $>1$ ) to concave  
625 ( $<1$ ). (C-E) Cell height in lateral (C) and midline (D) regions increases after the 7 somite stage,  
626 but the ratio (E) does not change. (F) Mosaic expression of membrane-GFP using the EIIA-Cre  
627 driver. (G) 3D projections of membrane-GFP signal from individual lateral cells. (H) Midline cells  
628 labeled with  $\beta$ -catenin. (I) 3D surface renderings of manually segmented midline cells. (J)  
629 Midbrain neural fold elevation occurs in two phases. Early elevation (0-6 somites) is driven by  
630 apical constriction in lateral cells without a change in cell height. At later stages (7-9 somites),  
631 both midline and lateral cells undergo significant apicobasal cell elongation. A single value was  
632 obtained for each embryo and the mean $\pm$ SD between embryos is shown,  $n = 3-4$  embryos/stage  
633 in (B-E), 408 cells in 3 embryos in (G), 60 cells in 3 embryos in (I),  $**p<0.01$ ,  $***p<0.001$  (one-  
634 way ANOVA test). See Supplementary File 1 for  $n$  and  $p$  values. Apical up in (A), (G), and (I),  
635 anterior up in (F) and (H). Bars, 100  $\mu\text{m}$  (A,F), 20  $\mu\text{m}$  (G-I).

636  
637 **Figure 4. IFT-A proteins have an early role in cranial neural tube closure.** (A) Wild-type  
638 littermate control (WT) showing normal cranial closure. (B,C) Exencephaly was observed in  
639 10/10 *Ift122* mutants (B) (compared with 0/16 WT controls) and 5/5 *Ttc21b* mutants (C)  
640 (compared with 0/13 WT controls). Dashed lines, lateral edge of the cranial neuroepithelium. (D-  
641 F) The cranial neural folds fail to elevate in *Ift122* (E) and *Ttc21b* (F) mutants compared to WT  
642 controls (D). Box, region shown in (G-I). (G-I) Lateral cells in WT and mutant embryos. Cells are  
643 labeled with ZO-1 (top) and are color-coded by apical area (bottom). (J-M) Average apical cell  
644 area (J,L) and apical area distributions (K,M) of lateral cells in *Ift122* and *Ttc21b* mutants  
645 compared with WT controls. A single value was obtained for each embryo and the mean $\pm$ SD  
646 between embryos is shown,  $n = 3-4$  embryos/genotype,  $**p<0.01$  (Welch's t-test). See  
647 Supplementary File 1 for  $n$  and  $p$  values. Anterior up in (A-C) and (G-I), anterior left in (D-F).  
648 Bars, 1 mm (A-C), 100  $\mu\text{m}$  (D-F), and 20  $\mu\text{m}$  (G-I).

649  
650 **Figure 5. IFT-A mutants display a failure of patterned apical remodeling.** (A) Schematic of  
651 midbrain regions analyzed in (B) (blue boxes) and (F) (yellow boxes). (B) Lateral and midline  
652 cells labeled with ZO1 are color-coded by apical area in wild-type littermate control (WT) and  
653 *Ift122* mutant embryos. (C-E) Apical area distributions (C,D) and average apical cell area (E).  
654 Lateral measurements are reproduced from Figure 4J. (F) Contiguous 20  $\mu\text{m}$  wide regions



655 spanning the mediolateral axis from the midline to the lateral margins of the midbrain neural  
656 plate. Cells are labeled with ZO1 and color-coded by apical area. **(G,H)** Apical cell area plotted  
657 by distance from the midline. **(I,J)** Average cell height in midline and lateral cells **(I)** measured in  
658 transverse sections of the cranial neural plate **(J)**. Phalloidin and laminin show apical and basal  
659 surfaces, respectively. A single value was obtained for each embryo and the mean $\pm$ SD between  
660 embryos is shown, n = 3-4 embryos/genotype, \*p<0.05, \*\*p<0.01 (one-way ANOVA test). See  
661 Supplementary File 1 for n and p values. Embryos are anterior up, 7 somites **(B-H)** or apical up,  
662 12 somites **(I,J)**. Bars, 20  $\mu$ m.

663

664 **Figure 6. Actomyosin organization is disrupted in IFT-A mutants.** **(A,E)** Localization of  
665 phosphorylated myosin II (phosphomyosin) **(A)** and F-actin **(E)** in lateral cells of *Ift122* and  
666 *Ttc21b* mutants and wild-type littermate controls (WT). **(B,F)** Orientation of apical  
667 phosphomyosin (P-myosin) cables **(B)** and F-actin cables **(F)** in *Ift122* and *Ttc21b* mutants and WT  
668 controls, Watson two-sample test for homogeneity. **(C,D)** The number of phosphomyosin cables  
669 **(C)** and F-actin cables **(D)** per embryo in two 100  $\mu$ m x 100  $\mu$ m lateral regions in *Ift122* and  
670 *Ttc21b* mutants. **(G,H)** The ratio of phosphomyosin to F-actin at cell-cell junctions was shifted to  
671 lower values in *Ttc21b* mutants. A single value was obtained from each embryo and the  
672 mean $\pm$ SD between embryos is shown, n = 29-86 phosphomyosin cables and 100-151 F-actin  
673 cables from 3 embryos/genotype in **(A-F)**, 50 cells from 3 embryos/genotype **(G,H)**, \*p<0.05,  
674 Welch's t-test in **(C,D)**, Watson two-sample test for homogeneity **(B,F)**. See Supplementary File  
675 1 for n and p values. Anterior up. Bars, 20  $\mu$ m.

676

677 **Figure 7. Shh-dependent cell fates expand laterally in Ift122 and Ttc21b mutants.** **(A)**  
678 Nkx6.1 protein visualized in tiled confocal images of cranial neural plate cells labeled with  
679 phalloidin (F-actin). **(B,C)** Nkx6.1 intensity plotted by distance from the midline, normalized to  
680 the mean Nkx6.1 intensity of the image, in *Ift122* **(B)** and *Ttc21b* **(C)** mutants compared with  
681 wild-type littermate controls (WT). A single value was obtained for each embryo and the  
682 mean $\pm$ SD between embryos is shown, n = 3 embryos/genotype. Anterior up. Bars, 100  $\mu$ m.

683

684 **Figure 8. Loss of Gli2 disrupts midline but not lateral cell shape.** **(A,D)** Lateral **(A)** and  
685 midline **(D)** cells in *Gli2* mutant embryos and wild-type littermate controls (WT). Cells are labeled  
686 with N-cadherin (top) and color coded by apical area (bottom). **(B,C,E,F)** Average apical cell  
687 area **(B,E)** and apical area distributions **(C,F)** of lateral and midline cells from WT and *Gli2*  
688 mutant embryos. **(G)** XZ reconstructions of lateral and midline cells labeled with F-actin in WT

689 and *Gli2* mutant embryos. (H) Cell height in lateral and midline cells in WT and *Gli2* mutant  
690 embryos. A single value was obtained for each embryo and the mean $\pm$ SD is shown. n = 5  
691 embryos/genotype, \*\*p<0.01, \*\*\*p<0.001, Welch's t-test (B,E) or Brown-Forsythe one-way  
692 ANOVA test (H). See Supplementary File 1 for n and p values. Embryos are 7-9 somites.  
693 Anterior up in (A,D), apical up in (G). Bars, 20  $\mu$ m.

694

695 **Figure 9. Ectopic Shh signaling disrupts lateral cell remodeling and causes exencephaly.**

696 (A,B) Expression of the activated Shh receptor Smoothed (SmoM2) using the midbrain-  
697 specific Wnt1-Cre2 driver causes exencephaly (12/12 Wnt1-Cre2; SmoM2 embryos vs. 0/13  
698 littermate controls). Control embryos were Wnt1-Cre2 or SmoM2 alone. (C,D) Wnt1-Cre2 drives  
699 SmoM2-YFP expression in the midbrain and induces ectopic Nkx6.1 expression throughout the  
700 mediolateral axis. Boxes, regions shown in (E,F). (E,F) Cells expressing SmoM2-YFP have  
701 larger apical areas compared with cells outside of the Wnt1-Cre2 expression domain (cells  
702 below the dashed line) and cells from equivalent regions in controls (E). SmoM2-YFP signal at  
703 the lateral edge of the N-cadherin region is shown. (G) Lateral and midline cells labeled with N-  
704 cadherin are color-coded by area in control and SmoM2-expressing embryos. (H-K) Average  
705 apical cell area (H,J) and apical area distributions (I,K) in lateral and midline cells in control and  
706 SmoM2 embryos. (L) Schematics of the pattern and intensity of the Shh response in WT, *Gli2*  
707 mutant, IFT-A mutant, and SmoM2-expressing embryos. (M) Model. The different shapes of  
708 lateral and midline cells correlate with different levels of Shh signaling. A high Shh response  
709 inhibits apical remodeling and apicobasal elongation in midline cells, whereas a low Shh  
710 response allows apical constriction in lateral cells. A single value was obtained for each embryo  
711 and the mean $\pm$ SD between embryos is shown, n = 3 embryos/genotype, \*\*p<0.01 (Welch's t-  
712 test). See Supplementary File 1 for n and p values. Embryos are E10.5 in (A,B), 6-7 somites in  
713 (E-K). Anterior up. Bars, 100  $\mu$ m in (C,D), and 20  $\mu$ m in (E-G).

714

715

716 **Supplementary Figure Legends**

717

718 **Figure 2 - Supplement 1. Figure 2 - Supplement 1. Analysis of mediolateral cell**  
719 **orientation in midline and lateral cells.** (A,D) One of the two 100  $\mu$ m x 100  $\mu$ m lateral regions  
720 analyzed in each wild-type embryo (A) and all midline regions analyzed in wild-type embryos  
721 (one image/embryo) (D) are shown. (B,E) Percentage of lateral (B) and midline (E) cells with a  
722 mediolateral (ML) orientation (0-45° relative to the ML axis) or an anterior-posterior (AP)

723 orientation (45-90° relative to the ML axis) at progressive stages of elevation. **(C,F)** The average  
724 ratio of cell length along the ML axis to cell length along the AP axis in lateral **(C)** and midline  
725 **(F)** cells. A single value was obtained for each embryo and the mean±SD between embryos is  
726 shown. n = 3-6 embryos/stage, \*p < 0.05, \*\*p<0.01, \*\*\*p<0.001, two-way ANOVA test **(B,E)** or  
727 Brown-Forsythe and Welch one-way ANOVA test **(C,F)**. See Supplementary File 1 for n and p  
728 values. Anterior up. Bars, 20 µm.

729

730 **Figure 3 - Supplement 1. The cranial neural plate transitions from convex to concave**  
731 **during elevation. (A)** The apical span of the cranial neural plate decreases significantly during  
732 elevation. **(B)** The basal span decreases slightly but does not reach statistical significance.  
733 Apical and basal spans were measured from one border to the other in the midbrain neural  
734 plate, encompassing midline and lateral cells. A single value was obtained for each embryo and  
735 the mean±SD between embryos is shown, n = 3-4 embryos/stage, \*p<0.05, \*\*p<0.01 (one-way  
736 ANOVA test). See Supplementary File 1 for n and p values.

737

738 **Figure 3 - Supplement 2. Midline cells do not apically constrict during elevation. (A)** The  
739 apical (top) and basal (bottom) surface of midline cells from a wild-type embryo. Cells outlines  
740 are labeled with β-catenin. **(B)** Distributions of the log<sub>2</sub> ratios of the apical area to the basal area  
741 of individual cells in three embryos. Cells with positive values are apically expanded, whereas  
742 cells with negative values are apically constricted. n = 50 cells/embryo from 3 wild-type  
743 embryos. See Supplementary File 1 for n and p values. Anterior up. Bars, 20 µm.

744

745 **Figure 4 - Supplement 1. Novel *Ift122* and *Ttc21b* alleles have defects in ciliogenesis.**  
746 **(A,B)** Mouse *Ift122* (A) and *Ttc21b* (B) loci showing the *Ift122*<sup>TR2</sup> and *Ttc21b*<sup>TF2</sup> mutations. **(C-E)**  
747 Localization of ZO-1 and the cilia marker Arl13b in lateral cells of the midbrain neural plate at 7-  
748 8 somites. Note the reduction in Arl13b staining in *Ift122* and *Ttc21b*. Anterior up. Bar, 20 µm.

749

750 **Figure 4 - Supplement 2. *Ift122* and *Ttc21b* mutants display a persistent failure of neural**  
751 **fold elevation. (A-C')** *Ift122* and *Ttc21b* embryos at 7 somites compared with a wild-type (WT)  
752 littermate control. Top panels, side views. Bottom panels, ventral views. Note the failure of  
753 neural fold elevation in *Ift122* and *Ttc21b* mutants. POS, pre-otic sulcus; OS, otic sulcus.  
754 Anterior left. **(D-E')** *Ift122* embryos at 12 somites compared with a WT littermate control. Top  
755 panels, dorsal views. Bottom panels, frontal views. Lateral neural folds are unelevated in the  
756 *Ift122* mutant midbrain and forebrain. **(F-G')** *Ift122* embryos at E9.5 compared with a WT

757 littermate control. Top panels, side views. Bottom panels, dorsal views. Cranial closure is  
758 completed by E9.5 in WT but the midbrain and forebrain neural folds are unelevated in *lft122*  
759 mutants. Dashed lines indicate the lateral neural plate borders.

760

761 **Figure 4 - Supplement 3. Disrupted cranial architecture in *lft122* mutants. (A-D)** Serial  
762 transverse sections through a wild-type littermate control (WT) and an *lft122* mutant embryo at  
763 11 somites. Phalloidin and laminin label the apical and basal surfaces of the neuroepithelium,  
764 respectively. Nkx6.1 labels ventral cells. In WT, the forebrain (fb, white arrowhead in top panel)  
765 is closed and the midbrain (mb) displays substantial neural fold elevation. In contrast, the *lft122*  
766 mutant shows a failure of forebrain closure (yellow arrowheads in top panel). Asterisks indicate  
767 the connection between the dorsal aorta and the first brachial arch artery. Nkx6.1 signal in the  
768 foregut pocket (f) is nonspecific trapping of secondary antibody. Bars, 100  $\mu$ m.

769

770 **Figure 4 - Supplement 4. Analysis of mediolateral cell orientation in *lft122* and *Ttc21b***  
771 **mutants. (A,C)** Percentage of lateral cells (A) and midline cells (C) with a mediolateral (ML)  
772 orientation (0-45° relative to the ML axis) or an anterior-posterior (AP) orientation (45-90°  
773 relative to the ML axis) in *lft122* mutants and wild-type littermate controls (WT). **(B,D)** Average  
774 ratio of cell length along the ML and AP axes. **(E)** Percentage of lateral cells with an ML or AP  
775 orientation in *Ttc21b* mutants and WT littermate controls. **(F)** Average ratio of cell length along  
776 the ML and AP axes. Midline cells could not be analyzed due to deep midline folds in *Ttc21b*  
777 mutants. A single value was obtained for each embryo and the mean $\pm$ SD between embryos is  
778 shown. n = 3-4 embryos/genotype, \*p < 0.05, \*\* p < 0.01, two-way ANOVA test **(A,C,E)** or  
779 Welch's t-test **(B,D,F)**. See Supplementary File 1 for n and p values.

780

781 **Figure 4 - Supplement 5. Cell proliferation is not affected in *lft122* and *Ttc21b* mutants.**  
782 **(A)** Images of the cranial neuroepithelium from the midbrain at the level of the cranial flexure  
783 (top) to the closed hindbrain (bottom) in a wild-type littermate control (WT) and an *lft122* mutant.  
784 Dividing cells are labeled with phospho-histone H3 (pHH3), which labels cells in M phase.  
785 Dashed rectangles indicate regions analyzed in **(E)**. **(B)** Projections of the cranial  
786 neuroepithelium from the forebrain-midbrain border (top) to the midbrain-hindbrain border  
787 (bottom) showing M-phase cells labeled with pHH3. Dashed rectangles indicate regions  
788 analyzed in **(F)**. **(C,D)** Lateral cells in *lft122* **(C)** and *Ttc21b* **(D)** mutants and littermate controls  
789 labeled with pHH3 and ZO-1. **(E,F)** The percentage of proliferative (pHH3+) cells in 100  $\mu$ m x  
790 100  $\mu$ m regions plotted by distance from the midline. Each bin is plotted at the minimum

791 distance for that bin. A single value was obtained for each embryo and the mean $\pm$ SD between  
792 embryos is shown, n = 3 embryos/genotype. No significant differences were observed between  
793 mutant embryos and WT controls (two-way ANOVA test). See Supplementary File 1 for n and p  
794 values. Anterior up. Bars, 100  $\mu$ m (A,B), 20  $\mu$ m (C,D).

795

796 **Figure 4 - Supplement 6. Mesenchymal cell density is not affected in *Ttc21b* mutants. (A)**  
797 Cell nuclei visualized with DAPI in the plane of the mesenchymal cells underlying the cranial  
798 neural plate from transverse sections of individual embryos. (B) The number of mesenchymal  
799 cells per 50  $\mu$ m x 100  $\mu$ m region is plotted for *Ttc21b* mutants and wild-type littermate controls  
800 (WT). A single value was obtained for each embryo and the mean $\pm$ SD between embryos is  
801 shown, n = 3 embryos/genotype, Welch's t-test. No significant differences between genotypes  
802 were observed. See Supplementary File 1 for n and p values. Apical up. Bar, 20  $\mu$ m.

803

804 **Figure 5 - Supplement 1. The convex to concave transition is defective in *lft122* and**  
805 ***Ttc21b* mutants. (A)** Transverse sections of a *Ttc21b* mutant and a wild-type littermate control  
806 (WT) at 8 somites. Phalloidin and laminin label the apical and basal surfaces of the  
807 neuroepithelium, respectively. DAPI (white) shows the nuclei. (B) Midline cells are significantly  
808 shorter than lateral cells in WT controls at 8 somites. This difference is eliminated in *Ttc21b*  
809 mutants. (C-F) The ratio of the apical span to the basal span of the neuroepithelium is increased  
810 in *Ttc21b* mutants at mid-elevation (8-9 somites) (C,D) and in *lft122* mutants at late elevation  
811 (12 somites) (E,F). Apical and basal spans were measured from one border to the other,  
812 encompassing midline and lateral cells. A single value was obtained for each embryo and the  
813 mean $\pm$ SD between embryos is shown, n = 3 embryos/genotype, \*p<0.05, \*\*p<0.01 (one-way  
814 ANOVA test in B, Welch's t-test in C-F). See Supplementary File 1 for n and p values. Apical  
815 up. Bars, 20  $\mu$ m.

816

817 **Figure 8 – Supplement 1. *Gli2* is required for *FoxA2* expression in the ventral neural**  
818 **plate. (A)** Single z-planes of *Gli2* mutant and wild-type littermate control (WT) embryos at the  
819 level of the floor plate of the midbrain neural plate (top) or at the level of the underlying  
820 notochord (bottom) labeled with the ventral/floor plate marker *FoxA2* and counterstained with  
821 phalloidin (F-actin). Note that *FoxA2* is expressed in the notochord but not the floor plate of *Gli2*  
822 mutants. (B) Maximum-intensity projections of WT control and *Gli2* mutant neural plates labeled  
823 with the ventral marker *Nkx6.1* and phalloidin. Embryos are 7-8 somites. Anterior up. Bars, 100  
824  $\mu$ m.

825

826 **Figure 8 - Supplement 2. Analysis of mediolateral cell orientation in *Gli2* mutants. (A,C)**

827 Percentage of lateral cells (A) and midline cells (C) with a mediolateral (ML) orientation (0-45°  
828 relative to the ML axis) or an anterior-posterior (AP) orientation (45-90° relative to the ML axis)  
829 in *Gli2* mutants and wild-type littermate controls (WT). **(B,D)** Average ratio of cell length along  
830 the ML and AP axes. n = 5 embryos/genotype, two-way ANOVA test (A,C) or Welch's t-test  
831 (B,D). See Supplementary File 1 for n and p values.

832

833 **Figure 9 – Supplement 1. Cell proliferation is not affected by neuroepithelial expression**

834 **of *SmoM2*.** **(A)** Lateral cell proliferation in embryos labeled with pHH3 to mark mitotic cells and  
835 phalloidin (F-actin) to mark cell outlines in embryos expressing activated Smoothed using the  
836 midbrain-specific Wnt1-Cre driver. Control embryos were Wnt1-Cre2 or *SmoM2* alone. **(B)** The  
837 percentage of proliferative (pHH3+) cells in a 100 μm x 100 μm lateral region. No significant  
838 difference was observed between *SmoM2*-expressing embryos and controls. A single value was  
839 obtained for each embryo and the mean±SD between embryos is shown, n = 4  
840 embryos/genotype, Welch's t-test. Embryos are 7-9 somites. See Supplementary File 1 for n  
841 and p values. Anterior up. Bars, 20 μm.

842

843 **Figure 9 - Supplement 2. Analysis of mediolateral cell orientation in *SmoM2*-expressing**

844 **embryos. (A,C)** Percentage of lateral cells (A) and midline cells (C) with a mediolateral (ML)  
845 orientation (0-45° relative to the ML axis) or an anterior-posterior (AP) orientation (45-90°  
846 relative to the ML axis) in embryos expressing activated Smoothed using the midbrain-  
847 specific Wnt1-Cre2 driver. Control embryos were Wnt1-Cre2 or *SmoM2* alone. **(B,D)** Average  
848 ratio of cell length along the ML and AP axes. n = 3 embryos per genotype, two-way ANOVA  
849 test (A,C) or Welch's t-test (B,D). See Supplementary File 1 for n and p values.

850

851 **Supplementary File 1. N values and details of statistical analyses performed.** The details of

852 the statistical tests performed, including the exact n and p values in the Figures and Figure  
853 supplements are presented.

854

855

856

857

858 **References**

859

- 860 Agostinelli C, Lund U. 2017. R package circular: Circular Statistics (version 0.4-93).
- 861 Arraf AA, Yelin R, Reshef I, Jadon J, Abboud M, Zaher M, Schneider J, Vladimirov FK,  
862 Schultheiss TM. 2020. Hedgehog Signaling Regulates Epithelial Morphogenesis to  
863 Position the Ventral Embryonic Midline. *Dev Cell* **53**:589-602.
- 864 Aw WY, Devenport D. 2017. Planar cell polarity: global inputs establishing cellular asymmetry.  
865 *Curr Opin Cell Biol* **44**:110–116.
- 866 Bai CB, Auerbach W, Lee JS, Stephen D, Joyner AL. 2002. Gli2, but not Gli1, is required for  
867 initial Shh signaling and ectopic activation of the Shh pathway. *Development* **129**:4753–  
868 4761.
- 869 Bangs F, Anderson KV. 2017. Primary Cilia and Mammalian Hedgehog Signaling. *Cold Spring*  
870 *Harb Perspect Biol* **9**. doi:10.1101/cshperspect.a028175
- 871 Brouns MR, Matheson SF, Hu KQ, Delalle I, Caviness VS, Silver J, Bronson RT, Settleman J.  
872 2000. The adhesion signaling molecule p190 RhoGAP is required for morphogenetic  
873 processes in neural development. *Development* **127**:4891–4903.
- 874 Brunet T, Larson BT, Linden TA, Vermeij MJA, McDonald K, King N. 2019. Light-regulated  
875 collective contractility in a multicellular choanoflagellate. *Science* **366**:326–334.
- 876 Burnside B. 1973. Microtubules and Microfilaments in Amphibian Neurulation. *Integr Comp Biol*  
877 **13**:989–1006.
- 878 Burnside MB, Jacobson AG. 1968. Analysis of morphogenetic movements in the neural plate of  
879 the newt *Taricha torosa*. *Dev Biol* **18**:537–552.
- 880 Cameron DA, Pennimpede T, Petkovich M. 2009. Tulp3 is a critical repressor of mouse  
881 hedgehog signaling. *Dev Dyn* **238**:1140–1149.
- 882 Caspary T, Larkins CE, Anderson KV. 2007. The graded response to Sonic Hedgehog depends  
883 on cilia architecture. *Dev Cell* **12**:767–778.
- 884 Corrigan D, Walther RF, Rodriguez L, Fichelson P, Pichaud F. 2007. Hedgehog signaling is a  
885 principal inducer of Myosin-II-driven cell ingression in *Drosophila* epithelia. *Dev Cell*  
886 **13**:730–742.
- 887 Cortellino S, Wang C, Wang B, Bassi MR, Caretti E, Champeval D, Calmont A, Jarnik M, Burch  
888 J, Zaret KS, Larue L, Bellacosa A. 2009. Defective ciliogenesis, embryonic lethality and  
889 severe impairment of the Sonic Hedgehog pathway caused by inactivation of the mouse  
890 complex A intraflagellar transport gene *Ift122/Wdr10*, partially overlapping with the DNA  
891 repair gene *Med1/Mbd4*. *Dev Biol* **325**:225–237.
- 892 Davidson LA, Keller RE. 1999. Neural tube closure in *Xenopus laevis* involves medial migration,  
893 directed protrusive activity, cell intercalation and convergent extension. *Development*  
894 **126**:4547–4556.
- 895 Dessaud E, McMahon AP, Briscoe J. 2008. Pattern formation in the vertebrate neural tube: a  
896 sonic hedgehog morphogen-regulated transcriptional network. *Development* **135**:2489–  
897 2503.
- 898 Eom DS, Amarnath S, Fogel JL, Agarwala S. 2011. Bone morphogenetic proteins regulate  
899 neural tube closure by interacting with the apicobasal polarity pathway. *Development*  
900 **138**:3179–3188.
- 901 Escudero LM, Bischoff M, Freeman M. 2007. Myosin II regulates complex cellular arrangement  
902 and epithelial architecture in *Drosophila*. *Dev Cell* **13**:717–729.
- 903 Escuin S, Vernay B, Savery D, Gurniak CB, Witke W, Greene NDE, Copp AJ. 2015. Rho-  
904 kinase-dependent actin turnover and actomyosin disassembly are necessary for mouse  
905 spinal neural tube closure. *J Cell Sci* **128**:2468–2481.
- 906 Farrell DL, Weitz O, Magnasco MO, Zallen JA. 2017. SEGGA: a toolset for rapid automated  
907 analysis of epithelial cell polarity and dynamics. *Development* **144**:1725–1734.

- 908 Fournier-Thibault C, Blavet C, Jarov A, Bajanca F, Thorsteinsdóttir S, Duband J-L. 2009. Sonic  
909 hedgehog regulates integrin activity, cadherin contacts, and cell polarity to orchestrate  
910 neural tube morphogenesis. *J Neurosci* **29**:12506–12520.
- 911 García-García MJ, Eggenschwiler JT, Caspary T, Alcorn HL, Wyler MR, Huangfu D, Rakeman  
912 AS, Lee JD, Feinberg EH, Timmer JR, Anderson KV. 2005. Analysis of mouse  
913 embryonic patterning and morphogenesis by forward genetics. *Proc Natl Acad Sci U S A*  
914 **102**:5913–5919.
- 915 Gordon HB, Lusk S, Carney KR, Wirick EO, Murray BF, Kwan KM. 2018. Hedgehog signaling  
916 regulates cell motility and optic fissure and stalk formation during vertebrate eye  
917 morphogenesis. *Development* **145**. doi:10.1242/dev.165068
- 918 Grego-Bessa J, Bloomekatz J, Castel P, Omelchenko T, Baselga J, Anderson KV. 2016. The  
919 tumor suppressor PTEN and the PDK1 kinase regulate formation of the columnar neural  
920 epithelium. *eLife* **5**:e12034.
- 921 Grego-Bessa J, Hildebrand J, Anderson KV. 2015. Morphogenesis of the mouse neural plate  
922 depends on distinct roles of cofilin 1 in apical and basal epithelial domains. *Development*  
923 **142**:1305–1314.
- 924 Haigo SL, Hildebrand JD, Harland RM, Wallingford JB. 2003. Shroom induces apical  
925 constriction and is required for hinge point formation during neural tube closure. *Curr Biol*  
926 **13**:2125–2137.
- 927 Harris MJ, Juriloff DM. 2007. Mouse mutants with neural tube closure defects and their role in  
928 understanding human neural tube defects. *Birth Defects Res A Clin Mol Teratol* **79**:187–  
929 210.
- 930 Harris MJ, Juriloff DM. 2010. An update to the list of mouse mutants with neural tube closure  
931 defects and advances toward a complete genetic perspective of neural tube closure.  
932 *Birth Defects Res A Clin Mol Teratol* **88**:653–669.
- 933 Hashimoto H, Robin FB, Sherrard KM, Munro EM. 2015. Sequential contraction and exchange  
934 of apical junctions drives zippering and neural tube closure in a simple chordate. *Dev*  
935 *Cell* **32**:241–255.
- 936 Hildebrand JD, Soriano P. 1999. Shroom, a PDZ Domain–Containing Actin-Binding Protein, Is  
937 Required for Neural Tube Morphogenesis in Mice. *Cell* **99**:485–497.
- 938 Hui CC, Joyner AL. 1993. A mouse model of greig cephalopolysyndactyly syndrome: the *extra-*  
939 *toesJ* mutation contains an intragenic deletion of the *Gli3* gene. *Nat Genet* **3**:241–246.
- 940 Ikeda A, Ikeda S, Gridley T, Nishina PM, Naggert JK. 2001. Neural tube defects and  
941 neuroepithelial cell death in *Tulp3* knockout mice. *Hum Mol Genet* **10**:1325–1334.
- 942 Itoh K, Ossipova O, Sokol SY. 2014. GEF-H1 functions in apical constriction and cell  
943 intercalations and is essential for vertebrate neural tube closure. *J Cell Sci* **127**:2542–  
944 2553.
- 945 Jacobson AG, Tam PP. 1982. Cephalic neurulation in the mouse embryo analyzed by SEM and  
946 morphometry. *Anat Rec* **203**:375–396.
- 947 Jeong J, Mao J, Tenzen T, Kottmann AH, McMahon AP. 2004. Hedgehog signaling in the  
948 neural crest cells regulates the patterning and growth of facial primordia. *Genes Dev*  
949 **18**:937–951.
- 950 Jessell TM. 2000. Neuronal specification in the spinal cord: inductive signals and transcriptional  
951 codes. *Nat Rev Genet* **1**:20–29.
- 952 Juriloff DM, Harris MJ. 2018. Insights into the Etiology of Mammalian Neural Tube Closure  
953 Defects from Developmental, Genetic and Evolutionary Studies. *J Dev Biol* **6**:22.
- 954 Keller RE. 1981. An experimental analysis of the role of bottle cells and the deep marginal zone  
955 in gastrulation of *Xenopus laevis*. *J Exp Zool* **216**:81–101.
- 956 Kicheva A, Briscoe J. 2015. Developmental Pattern Formation in Phases. *Trends Cell Biol*  
957 **25**:579–591.



- 958 Ko CS, Martin AC. 2020. The cellular and molecular mechanisms that establish the mechanics  
959 of *Drosophila* gastrulation. *Curr Top Dev Biol* **136**:141–165.
- 960 Lakso M, Pichel JG, Gorman JR, Sauer B, Okamoto Y, Lee E, Alt FW, Westphal H. 1996.  
961 Efficient in vivo manipulation of mouse genomic sequences at the zygote stage. *Proc*  
962 *Natl Acad Sci U S A* **93**:5860–5865.
- 963 Lee C, Scherr HM, Wallingford JB. 2007. Shroom family proteins regulate gamma-tubulin  
964 distribution and microtubule architecture during epithelial cell shape change.  
965 *Development* **134**:1431–1441.
- 966 Lee J-Y, Goldstein B. 2003. Mechanisms of cell positioning during *C. elegans* gastrulation.  
967 *Development* **130**:307–320.
- 968 Lee J-Y, Harland RM. 2007. Actomyosin contractility and microtubules drive apical constriction  
969 in *Xenopus* bottle cells. *Dev Biol* **311**:40–52.
- 970 Lee J-Y, Harland RM. 2010. Endocytosis is required for efficient apical constriction during  
971 *Xenopus* gastrulation. *Curr Biol* **20**:253–258.
- 972 Lee J-Y, Marston DJ, Walston T, Hardin J, Halberstadt A, Goldstein B. 2006. Wnt/Frizzled  
973 signaling controls *C. elegans* gastrulation by activating actomyosin contractility. *Curr Biol*  
974 **16**:1986–1997.
- 975 Legland D, Arganda-Carreras I, Andrey P. 2016. MorphoLibJ: integrated library and plugins for  
976 mathematical morphology with ImageJ. *Bioinformatics* **32**:3532–3534.
- 977 Lewis AE, Vasudevan HN, O’Neill AK, Soriano P, Bush JO. 2013. The widely used *Wnt1-Cre*  
978 transgene causes developmental phenotypes by ectopic activation of Wnt signaling. *Dev*  
979 *Biol* **379**:229–234.
- 980 Liem KF Jr, Ashe A, He M, Satir P, Moran J, Beier D, Wicking C, Anderson KV. 2012. The IFT-A  
981 complex regulates Shh signaling through cilia structure and membrane protein  
982 trafficking. *J Cell Biol* **197**:789–800.
- 983 Martin AC, Goldstein B. 2014. Apical constriction: themes and variations on a cellular  
984 mechanism driving morphogenesis. *Development* **141**:1987–1998.
- 985 Mashburn DN, Lynch HE, Ma X, Hutson MS. 2012. Enabling user-guided segmentation and  
986 tracking of surface-labeled cells in time-lapse image sets of living tissues. *Cytometry A*  
987 **81**:409–418.
- 988 Massarwa R, Ray HJ, Niswander L. 2014. Morphogenetic movements in the neural plate and  
989 neural tube: mouse. *Wiley Interdiscip Rev Dev Biol* **3**:59–68.
- 990 Matisse MP, Epstein DJ, Park HL, Platt KA, Joyner AL. 1998. Gli2 is required for induction of  
991 floor plate and adjacent cells, but not most ventral neurons in the mouse central nervous  
992 system. *Development* **125**:2759–2770.
- 993 McGlinn E, Tabin CJ. 2006. Mechanistic insight into how Shh patterns the vertebrate limb. *Curr*  
994 *Opin Genet Dev* **16**:426–432.
- 995 McGreevy EM, Vijayraghavan D, Davidson LA, Hildebrand JD. 2015. Shroom3 functions  
996 downstream of planar cell polarity to regulate myosin II distribution and cellular  
997 organization during neural tube closure. *Biol Open* **4**:186–196.
- 998 McMahan AP, Ingham PW, Tabin CJ. 2003. Developmental roles and clinical significance of  
999 hedgehog signaling. *Curr Top Dev Biol* **53**:1–114.
- 1000 McShane SG, Molè MA, Savery D, Greene NDE, Tam PPL, Copp AJ. 2015. Cellular basis of  
1001 neuroepithelial bending during mouse spinal neural tube closure. *Dev Biol* **404**:113–124.
- 1002 Mo R, Freer AM, Zinyk DL, Crackower MA, Michaud J, Heng HH, Chik KW, Shi XM, Tsui LC,  
1003 Cheng SH, Joyner AL, Hui C. 1997. Specific and redundant functions of Gli2 and Gli3  
1004 zinc finger genes in skeletal patterning and development. *Development* **124**:113–123.
- 1005 Molè MA, Galea GL, Rolo A, Weberling A, Nychyk O, De Castro SC, Savery D, Fässler R, Ybot-  
1006 González P, Greene NDE, Copp AJ. 2020. Integrin-Mediated Focal Anchorage Drives  
1007 Epithelial Zippering during Mouse Neural Tube Closure. *Dev Cell* **52**:321–334.e6.

- 1008 Morriss-Kay G, Tuckett F. 1985. The role of microfilaments in cranial neurulation in rat embryos:  
1009 effects of short-term exposure to cytochalasin D. *J Embryol Exp Morphol* **88**:333–348.
- 1010 Murdoch JN, Copp AJ. 2010. The relationship between sonic Hedgehog signaling, cilia, and  
1011 neural tube defects. *Birth Defects Res A Clin Mol Teratol* **88**:633–652.
- 1012 Muzumdar MD, Tasic B, Miyamichi K, Li L, Luo L. 2007. A global double-fluorescent Cre  
1013 reporter mouse. *Genesis* **45**:593–605.
- 1014 Nasr T, Mancini P, Rankin SA, Edwards NA, Agricola ZN, Kenny AP, Kinney JL, Daniels K,  
1015 Vardanyan J, Han L, Trisno SL, Cha S-W, Wells JM, Kofron MJ, Zorn AM. 2019.  
1016 Endosome-Mediated Epithelial Remodeling Downstream of Hedgehog-Gli Is Required  
1017 for Tracheoesophageal Separation. *Dev Cell* **51**:665-674.e6.
- 1018 Nikolopoulou E, Galea GL, Rolo A, Greene NDE, Copp AJ. 2017. Neural tube closure: cellular,  
1019 molecular and biomechanical mechanisms. *Development* **144**:552–566.
- 1020 Nishimura T, Honda H, Takeichi M. 2012. Planar cell polarity links axes of spatial dynamics in  
1021 neural-tube closure. *Cell* **149**:1084–1097.
- 1022 Nishimura T, Takeichi M. 2008. Shroom3-mediated recruitment of Rho kinases to the apical cell  
1023 junctions regulates epithelial and neuroepithelial planar remodeling. *Development*  
1024 **135**:1493–1502.
- 1025 Norman RX, Ko HW, Huang V, Eun CM, Ablner LL, Zhang Z, Sun X, Eggenschwiler JT. 2009.  
1026 Tubby-like protein 3 (TULP3) regulates patterning in the mouse embryo through  
1027 inhibition of Hedgehog signaling. *Hum Mol Genet* **18**:1740–1754.
- 1028 Ohmura T, Shioi G, Hirano M, Aizawa S. 2012. Neural tube defects by *NUAK1* and *NUAK2*  
1029 double mutation. *Dev Dyn* **241**:1350–1364.
- 1030 Ossipova O, Kim K, Lake BB, Itoh K, Ioannou A, Sokol SY. 2014. Role of Rab11 in planar cell  
1031 polarity and apical constriction during vertebrate neural tube closure. *Nat Commun*  
1032 **5**:3734.
- 1033 Patterson VL, Damrau C, Paudyal A, Reeve B, Grimes DT, Stewart ME, Williams DJ, Siggers P,  
1034 Greenfield A, Murdoch JN. 2009. Mouse *hitchhiker* mutants have spina bifida, dorso-  
1035 ventral patterning defects and polydactyly: identification of Tulp3 as a novel negative  
1036 regulator of the Sonic hedgehog pathway. *Hum Mol Genet* **18**:1719–1739.
- 1037 Plageman TF Jr, Chung M-I, Lou M, Smith AN, Hildebrand JD, Wallingford JB, Lang RA. 2010.  
1038 Pax6-dependent *Shroom3* expression regulates apical constriction during lens placode  
1039 invagination. *Development* **137**:405–415.
- 1040 Pyrgaki C, Trainor P, Hadjantonakis A-K, Niswander L. 2010. Dynamic imaging of mammalian  
1041 neural tube closure. *Dev Biol* **344**:941–947.
- 1042 Qin J, Lin Y, Norman RX, Ko HW, Eggenschwiler JT. 2011. Intraflagellar transport protein 122  
1043 antagonizes Sonic Hedgehog signaling and controls ciliary localization of pathway  
1044 components. *Proc Natl Acad Sci U S A* **108**:1456–1461.
- 1045 Qiu M, Shimamura K, Sussel L, Chen S, Rubenstein JL. 1998. Control of anteroposterior and  
1046 dorsoventral domains of *Nkx-6.1* gene expression relative to other *Nkx* genes during  
1047 vertebrate CNS development. *Mech Dev* **72**:77–88.
- 1048 R Core Team. 2020. R: A Language and Environment for Statistical Computing.
- 1049 Rao-Bhatia A, Zhu M, Yin W-C, Coquenlorge S, Zhang X, Woo J, Sun Y, Dean CH, Liu A, Hui  
1050 C-C, Shivdasani RA, McNeill H, Hopyan S, Kim T-H. 2020. Hedgehog-Activated Fat4  
1051 and PCP Pathways Mediate Mesenchymal Cell Clustering and Villus Formation in Gut  
1052 Development. *Dev Cell* **52**:647-658.e6.
- 1053 Ray HJ, Niswander LA. 2016a. Dynamic behaviors of the non-neural ectoderm during  
1054 mammalian cranial neural tube closure. *Dev Biol* **416**:279–285.
- 1055 Ray HJ, Niswander LA. 2016b. Grainyhead-like 2 downstream targets act to suppress epithelial-  
1056 to-mesenchymal transition during neural tube closure. *Development* **143**:1192–1204.
- 1057 Robbins DJ, Fei DL, Riobo NA. 2012. The Hedgehog signal transduction network. *Sci Signal*  
1058 **5**:re6.

- 1059 de la Roche M, Ritter AT, Angus KL, Dinsmore C, Earnshaw CH, Reiter JF, Griffiths GM. 2013.  
1060 Hedgehog signaling controls T cell killing at the immunological synapse. *Science*  
1061 **342**:1247–1250.
- 1062 Sagner A, Briscoe J. 2019. Establishing neuronal diversity in the spinal cord: a time and a place.  
1063 *Development* **146**. doi:10.1242/dev.182154.
- 1064 Schindelin J, Arganda-Carreras I, Frise E, Kaynig V, Longair M, Pietzsch T, Preibisch S,  
1065 Rueden C, Saalfeld S, Schmid B, Tinevez J-Y, White DJ, Hartenstein V, Eliceiri K,  
1066 Tomancak P, Cardona A. 2012. Fiji: an open-source platform for biological-image  
1067 analysis. *Nat Methods* **9**:676–682.
- 1068 Schneider CA, Rasband WS, Eliceiri KW. 2012. NIH Image to ImageJ: 25 years of image  
1069 analysis. *Nat Methods* **9**:671–675.
- 1070 Schoenwolf GC, Franks MV. 1984. Quantitative analyses of changes in cell shapes during  
1071 bending of the avian neural plate. *Dev Biol* **105**:257–272.
- 1072 Smith JL, Schoenwolf GC. 1988. Role of cell-cycle in regulating neuroepithelial cell shape  
1073 during bending of the chick neural plate. *Cell Tissue Res* **252**:491–500.
- 1074 Smith JL, Schoenwolf GC, Quan J. 1994. Quantitative analyses of neuroepithelial cell shapes  
1075 during bending of the mouse neural plate. *J Comp Neurol* **342**:144–151.
- 1076 Stottmann RW, Berrong M, Matta K, Choi M, Klingensmith J. 2006. The BMP antagonist Noggin  
1077 promotes cranial and spinal neurulation by distinct mechanisms. *Dev Biol* **295**:647–663.
- 1078 Sutherland A, Keller R, Lesko A. 2020. Convergent extension in mammalian morphogenesis.  
1079 *Semin Cell Dev Biol* **100**:199–211.
- 1080 Svärd J, Heby-Henricson K, Persson-Lek M, Rozell B, Lauth M, Bergström A, Ericson J,  
1081 Toftgård R, Teglund S. 2006. Genetic elimination of Suppressor of fused reveals an  
1082 essential repressor function in the mammalian Hedgehog signaling pathway. *Dev Cell*  
1083 **10**:187–197.
- 1084 Tang M, Luo SX, Tang V, Huang EJ. 2013. Temporal and spatial requirements of Smoothed  
1085 in ventral midbrain neuronal development. *Neural Dev* **8**:8.
- 1086 Tickle C, Towers M. 2017. Sonic Hedgehog Signaling in Limb Development. *Front Cell Dev Biol*  
1087 **5**:14.
- 1088 Tran PV, Haycraft CJ, Besschetnova TY, Turbe-Doan A, Stottmann RW, Herron BJ, Chesebro  
1089 AL, Qiu H, Scherz PJ, Shah JV, Yoder BK, Beier DR. 2008. THM1 negatively modulates  
1090 mouse sonic hedgehog signal transduction and affects retrograde intraflagellar transport  
1091 in cilia. *Nat Genet* **40**:403–410.
- 1092 Vijayraghavan DS, Davidson LA. 2017. Mechanics of neurulation: From classical to current  
1093 perspectives on the physical mechanics that shape, fold, and form the neural tube. *Birth*  
1094 *Defects Res* **109**:153–168.
- 1095 Villavicencio EH, Walterhouse DO, Iannaccone PM. 2000. The sonic hedgehog-patched-gli  
1096 pathway in human development and disease. *Am J Hum Genet* **67**:1047–1054.
- 1097 Wallingford JB, Harland RM. 2002. Neural tube closure requires Dishevelled-dependent  
1098 convergent extension of the midline. *Development* **129**:5815–5825.
- 1099 Wallingford JB, Niswander LA, Shaw GM, Finnell RH. 2013. The continuing challenge of  
1100 understanding, preventing, and treating neural tube defects. *Science* **339**:1222002.
- 1101 Wilde JJ, Petersen JR, Niswander L. 2014. Genetic, epigenetic, and environmental  
1102 contributions to neural tube closure. *Annu Rev Genet* **48**:583–611.
- 1103 Williams M, Yen W, Lu X, Sutherland A. 2014. Distinct apical and basolateral mechanisms drive  
1104 planar cell polarity-dependent convergent extension of the mouse neural plate. *Dev Cell*  
1105 **29**:34–46.
- 1106 Wong SY, Reiter JF. 2008. The primary cilium at the crossroads of mammalian hedgehog  
1107 signaling. *Curr Top Dev Biol* **85**:225–260.
- 1108 Ybot-Gonzalez P, Cogram P, Gerrelli D, Copp AJ. 2002. Sonic hedgehog and the molecular  
1109 regulation of mouse neural tube closure. *Development* **129**:2507–2517.

- 1110 Ybot-Gonzalez P, Copp AJ. 1999. Bending of the neural plate during mouse spinal neurulation  
1111 is independent of actin microfilaments. *Dev Dyn* **215**:273–283.
- 1112 Ybot-Gonzalez P, Gaston-Massuet C, Girdler G, Klingensmith J, Arkell R, Greene NDE, Copp  
1113 AJ. 2007. Neural plate morphogenesis during mouse neurulation is regulated by  
1114 antagonism of Bmp signalling. *Development* **134**:3203–3211.
- 1115 Yushkevich PA, Piven J, Hazlett HC, Smith RG, Ho S, Gee JC, Gerig G. 2006. User-guided 3D  
1116 active contour segmentation of anatomical structures: significantly improved efficiency  
1117 and reliability. *Neuroimage* **31**:1116–1128.
- 1118 Zaganjor I, Sekkarie A, Tsang BL, Williams J, Razzaghi H, Mulinare J, Sniezek JE, Cannon MJ,  
1119 Rosenthal J. 2016. Describing the Prevalence of Neural Tube Defects Worldwide: A  
1120 Systematic Literature Review. *PLoS One* **11**:e0151586.
- 1121 Zuñiga NR, Stoeckli ET. 2017. Sonic -'Jack-of-all-trades' in neural circuit formation. *J Dev Biol*  
1122 **5**. doi:10.3390/jdb5010002.

**Figure 1**

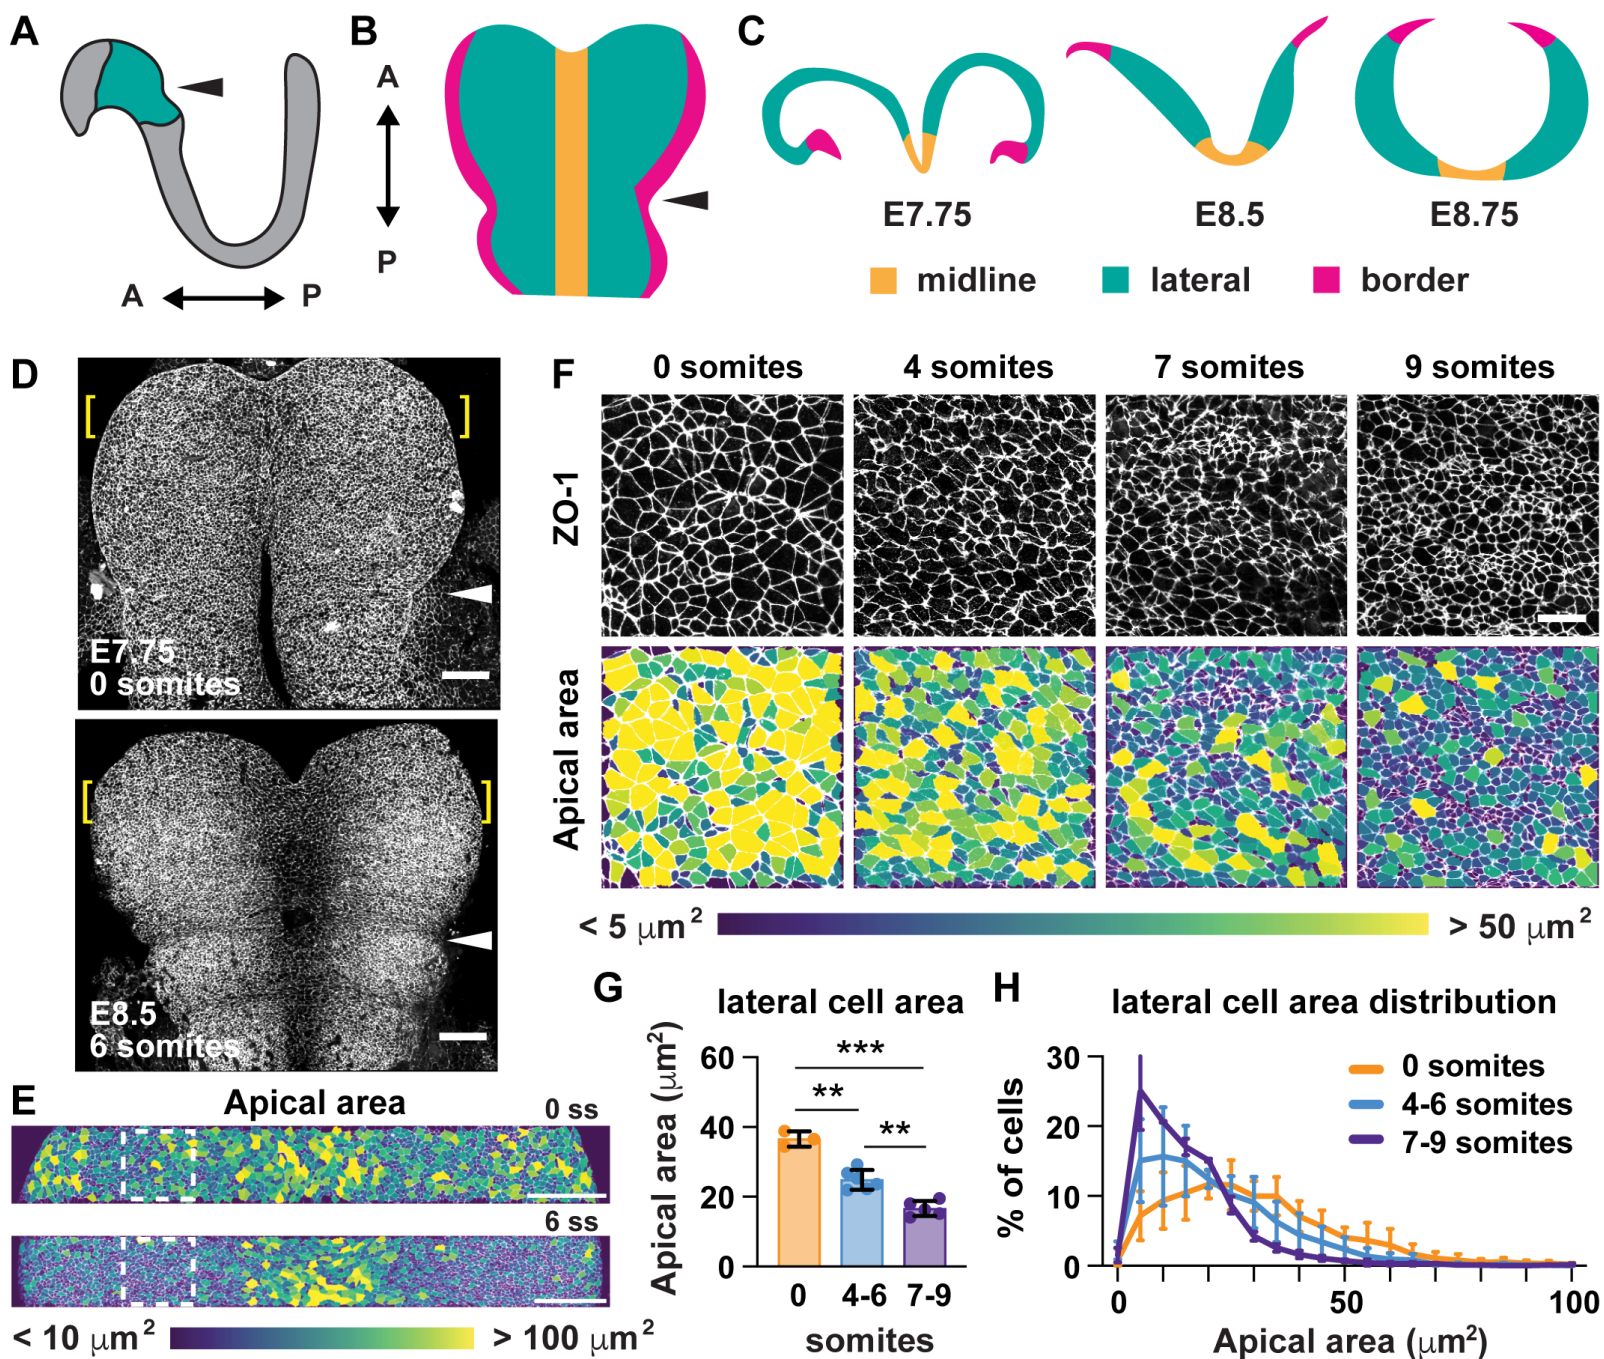

## Figure 2

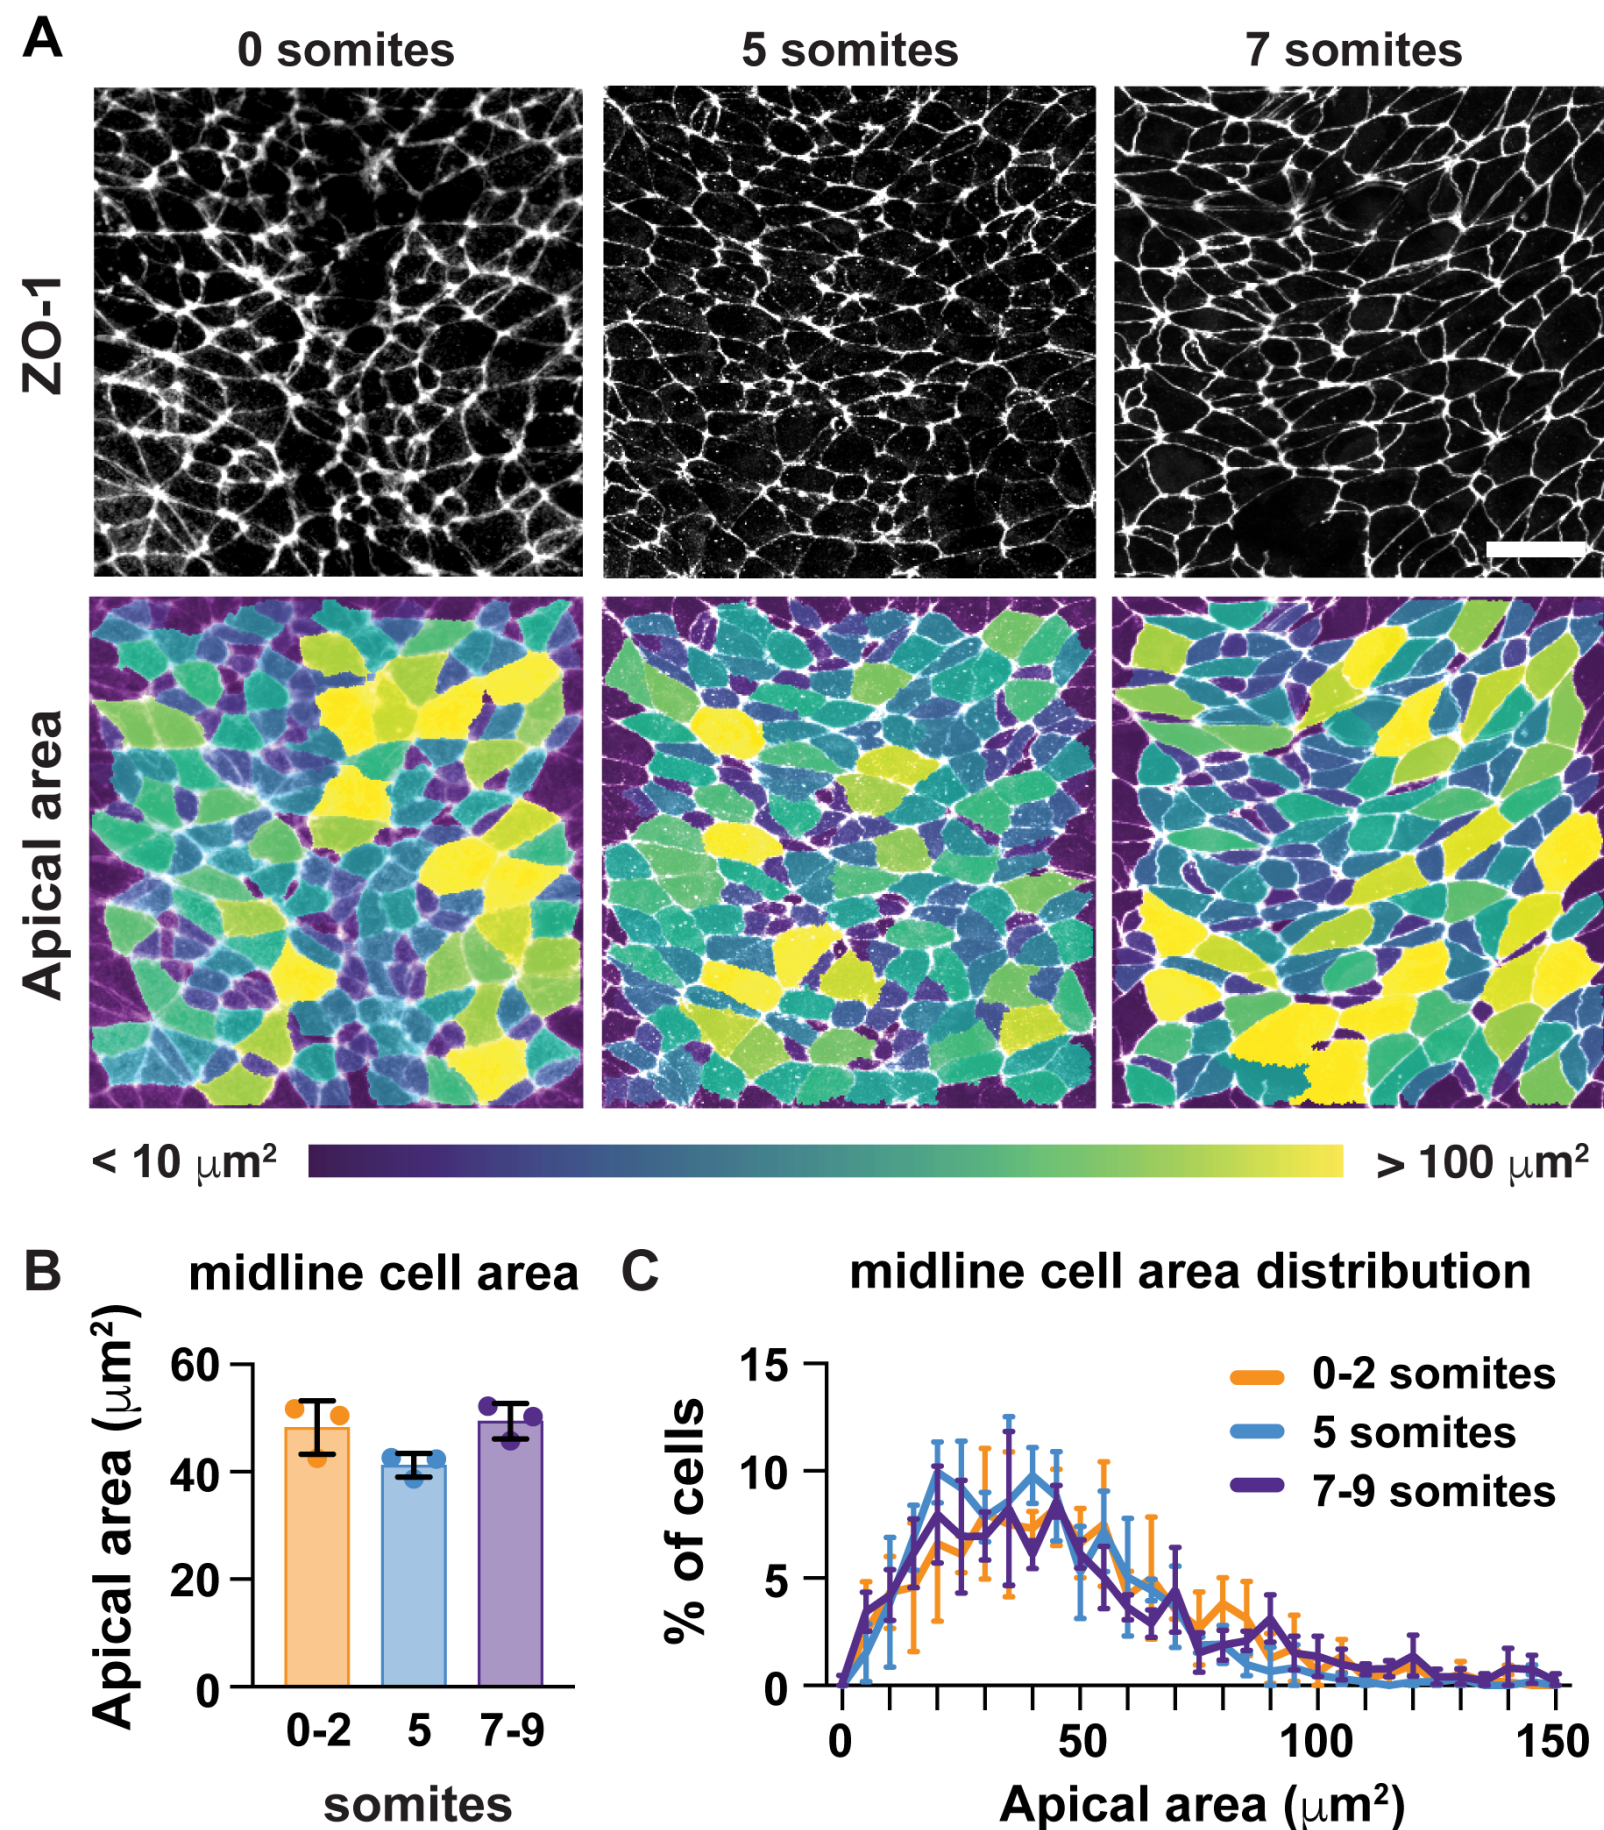

Figure 3

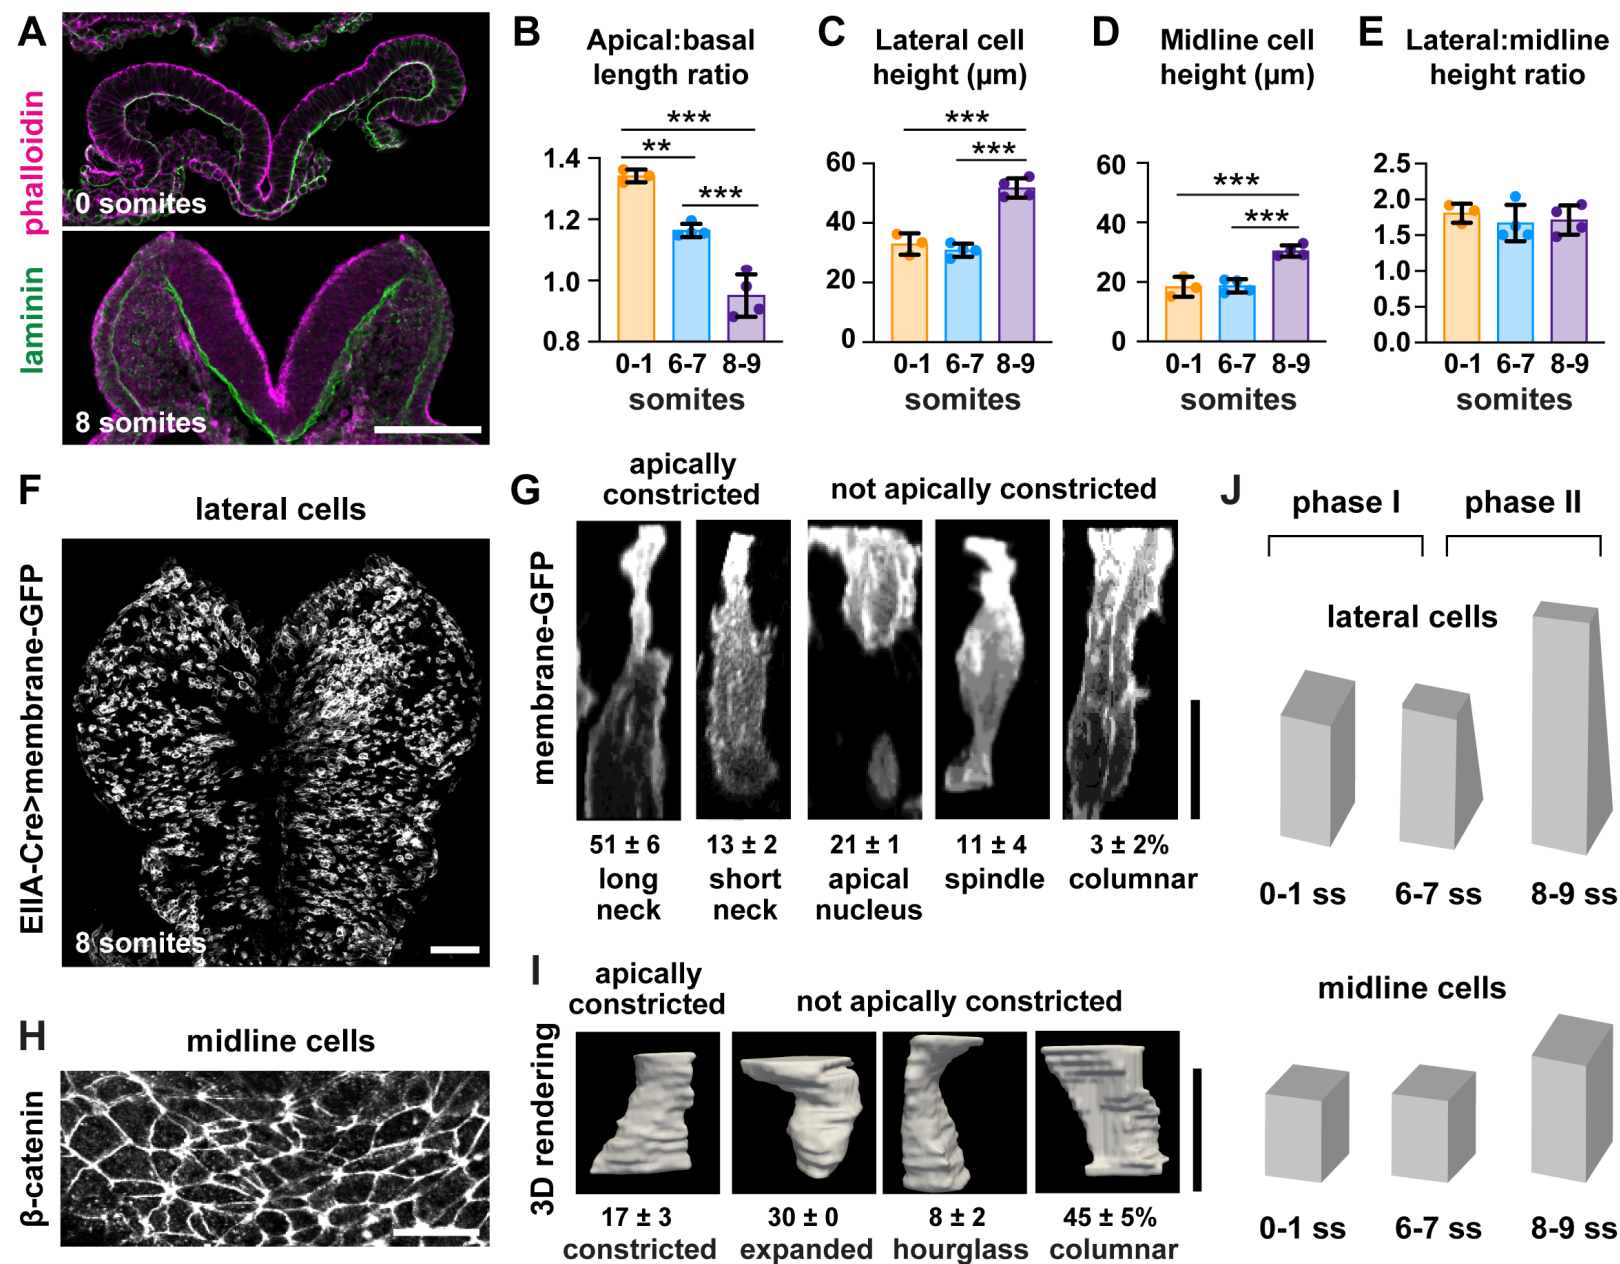

Figure 4

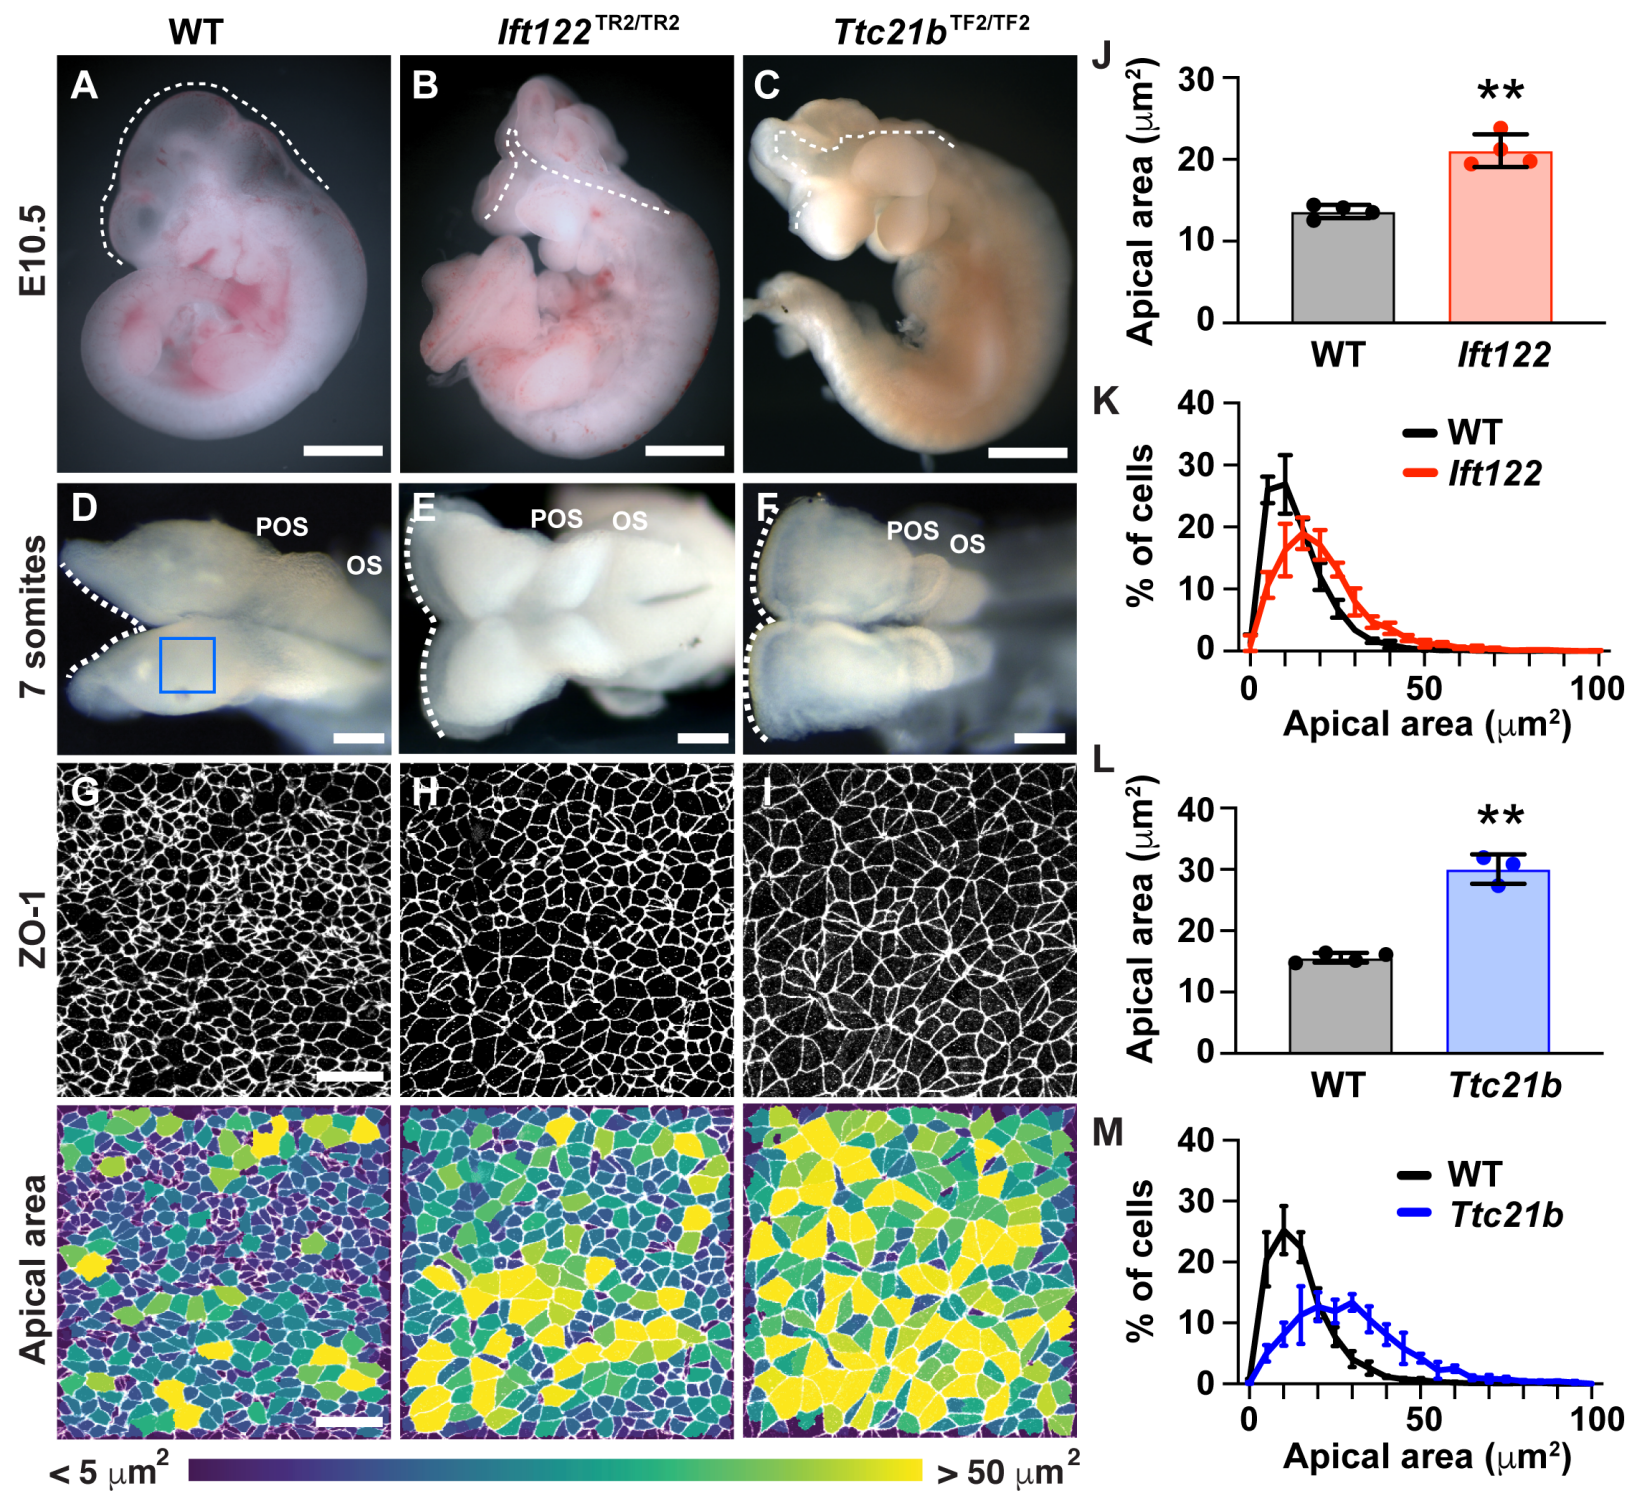



**Figure 5**

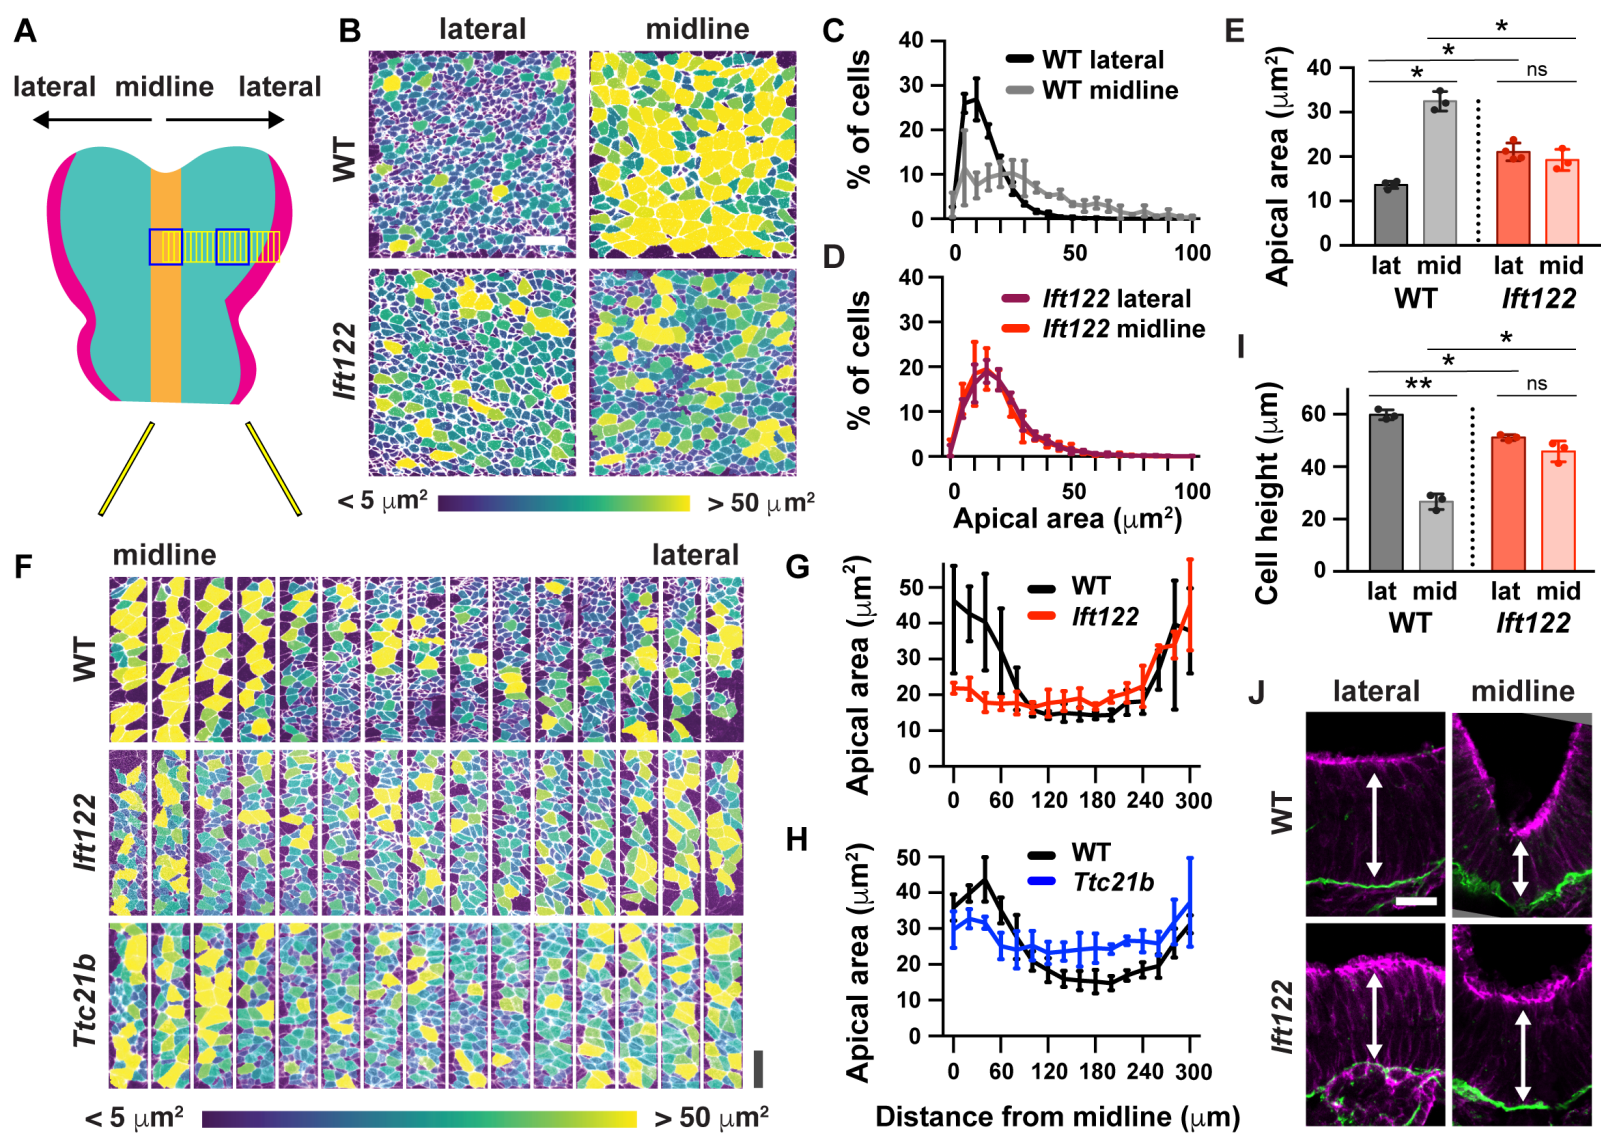

**Figure 6**

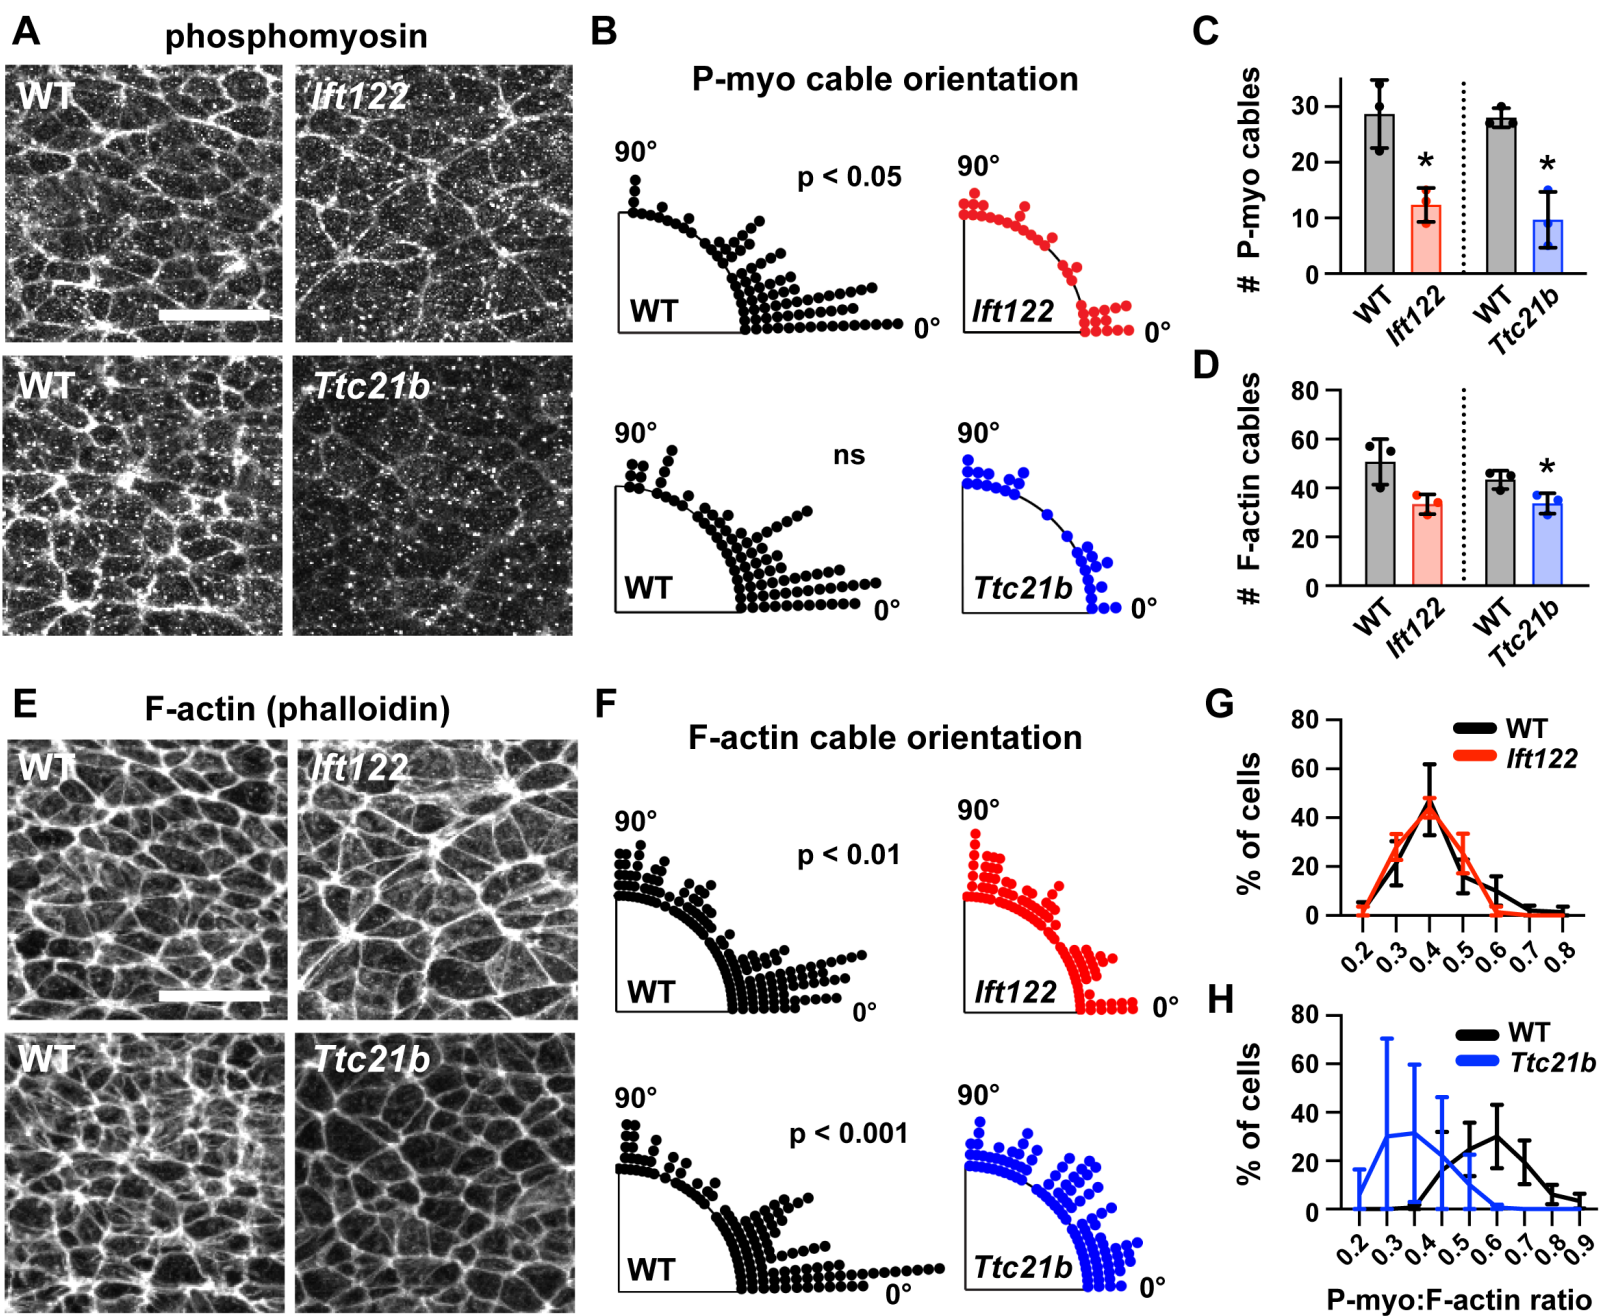

## Figure 7

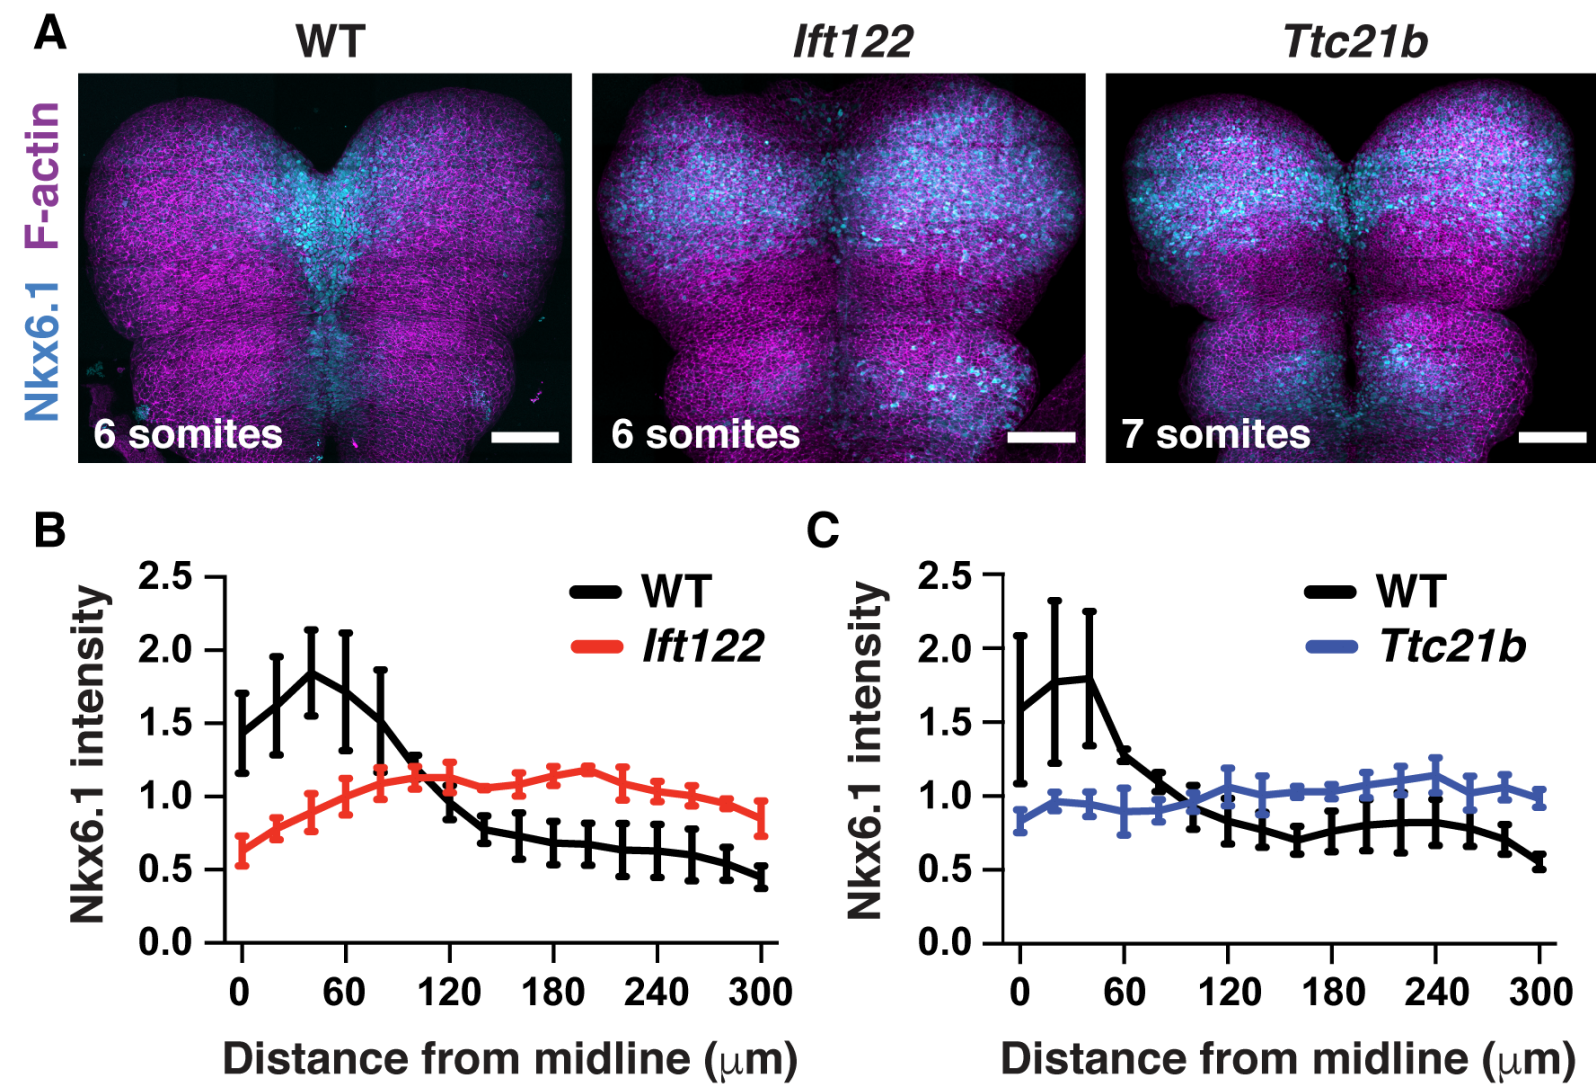

## Figure 8

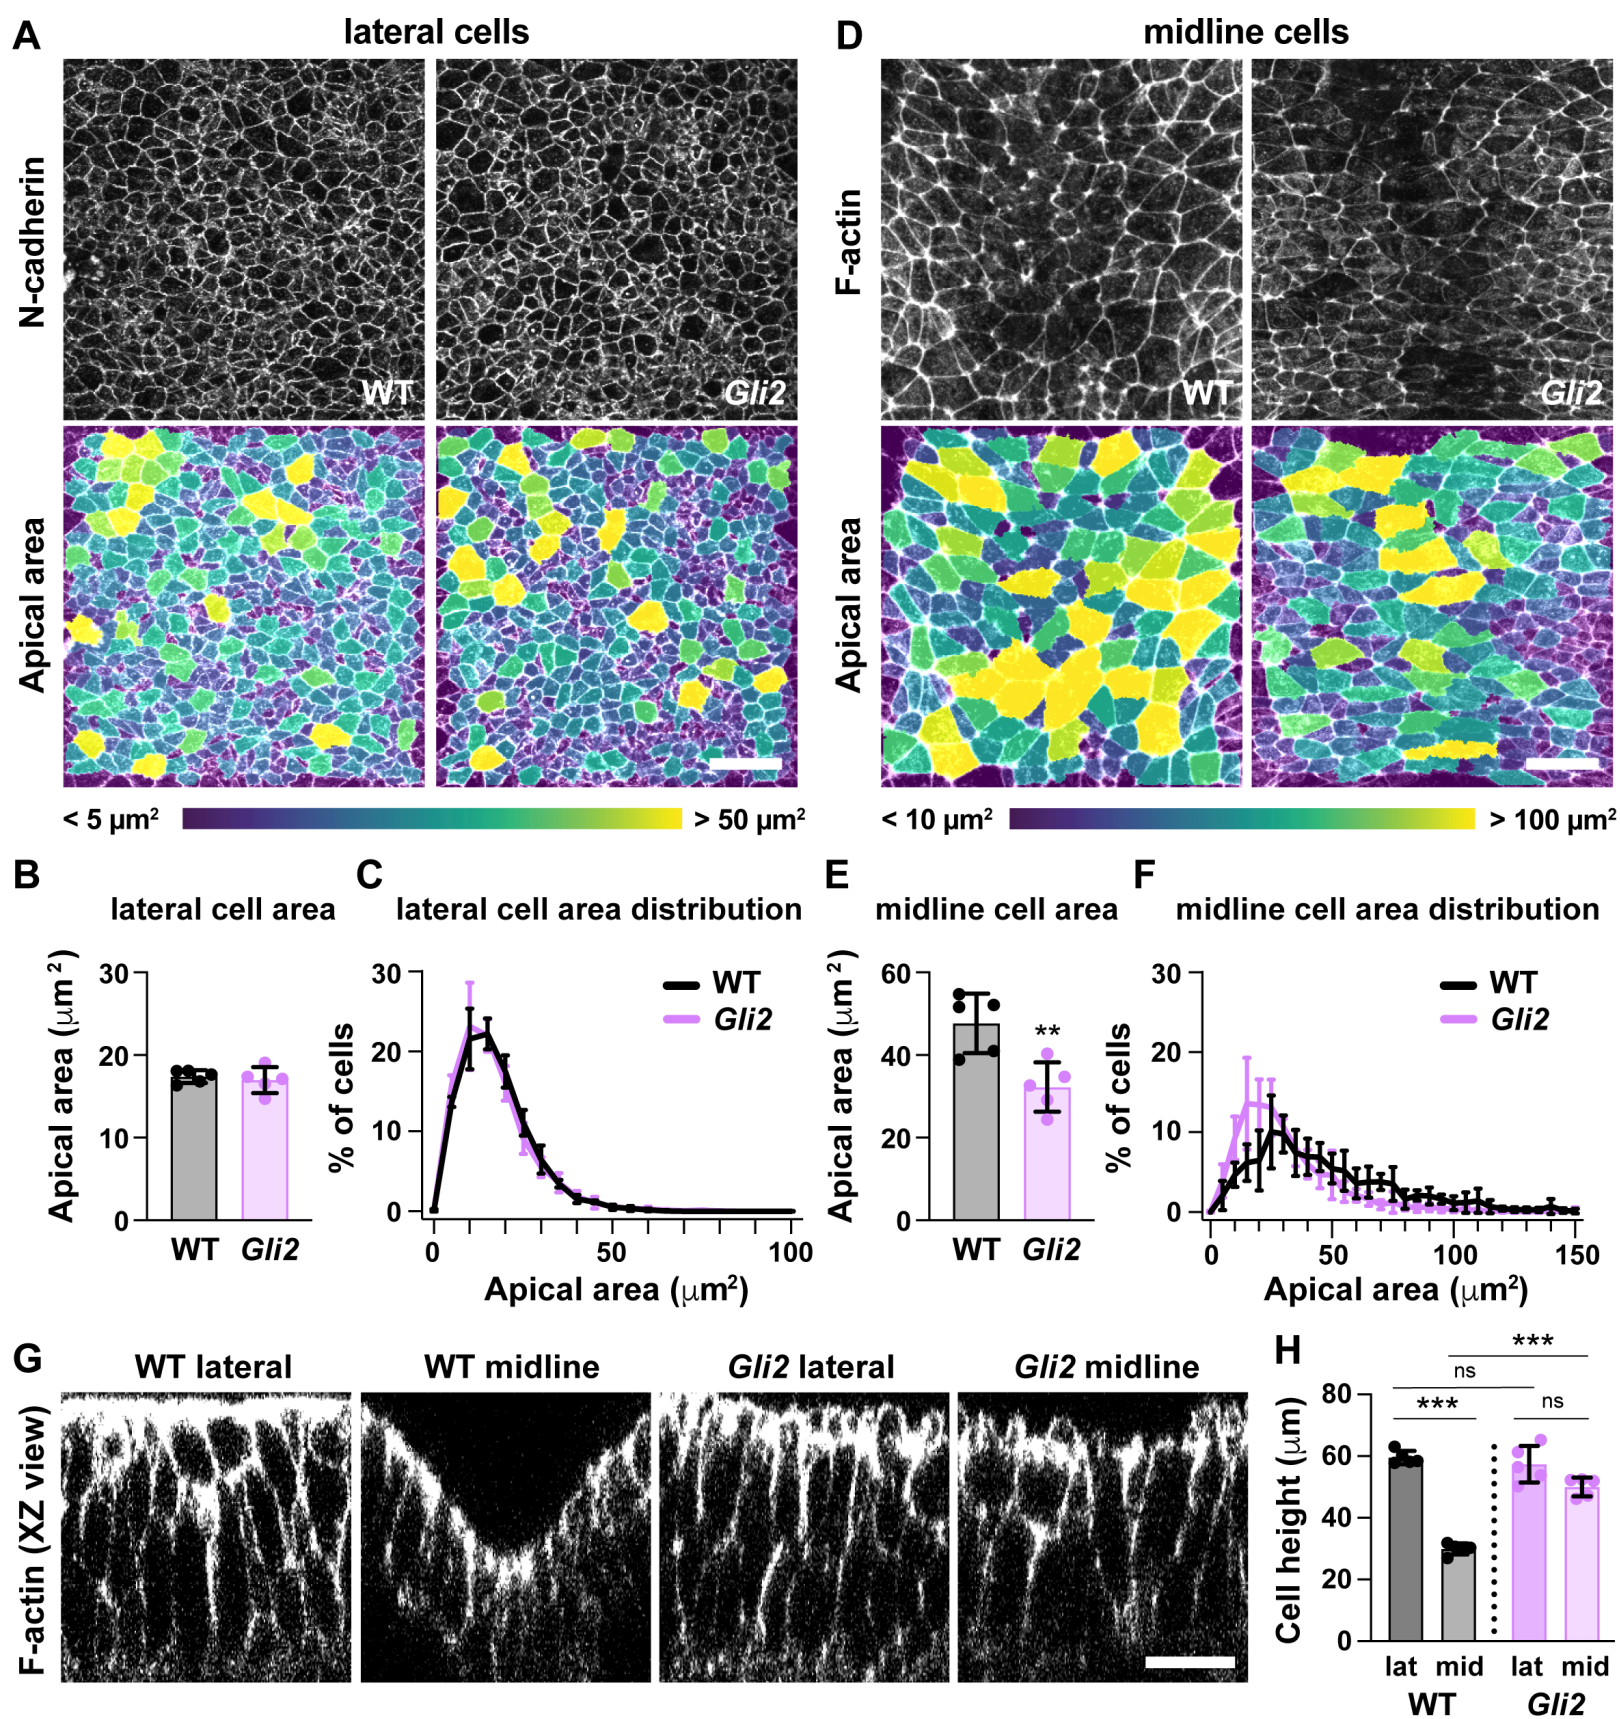

## Figure 9

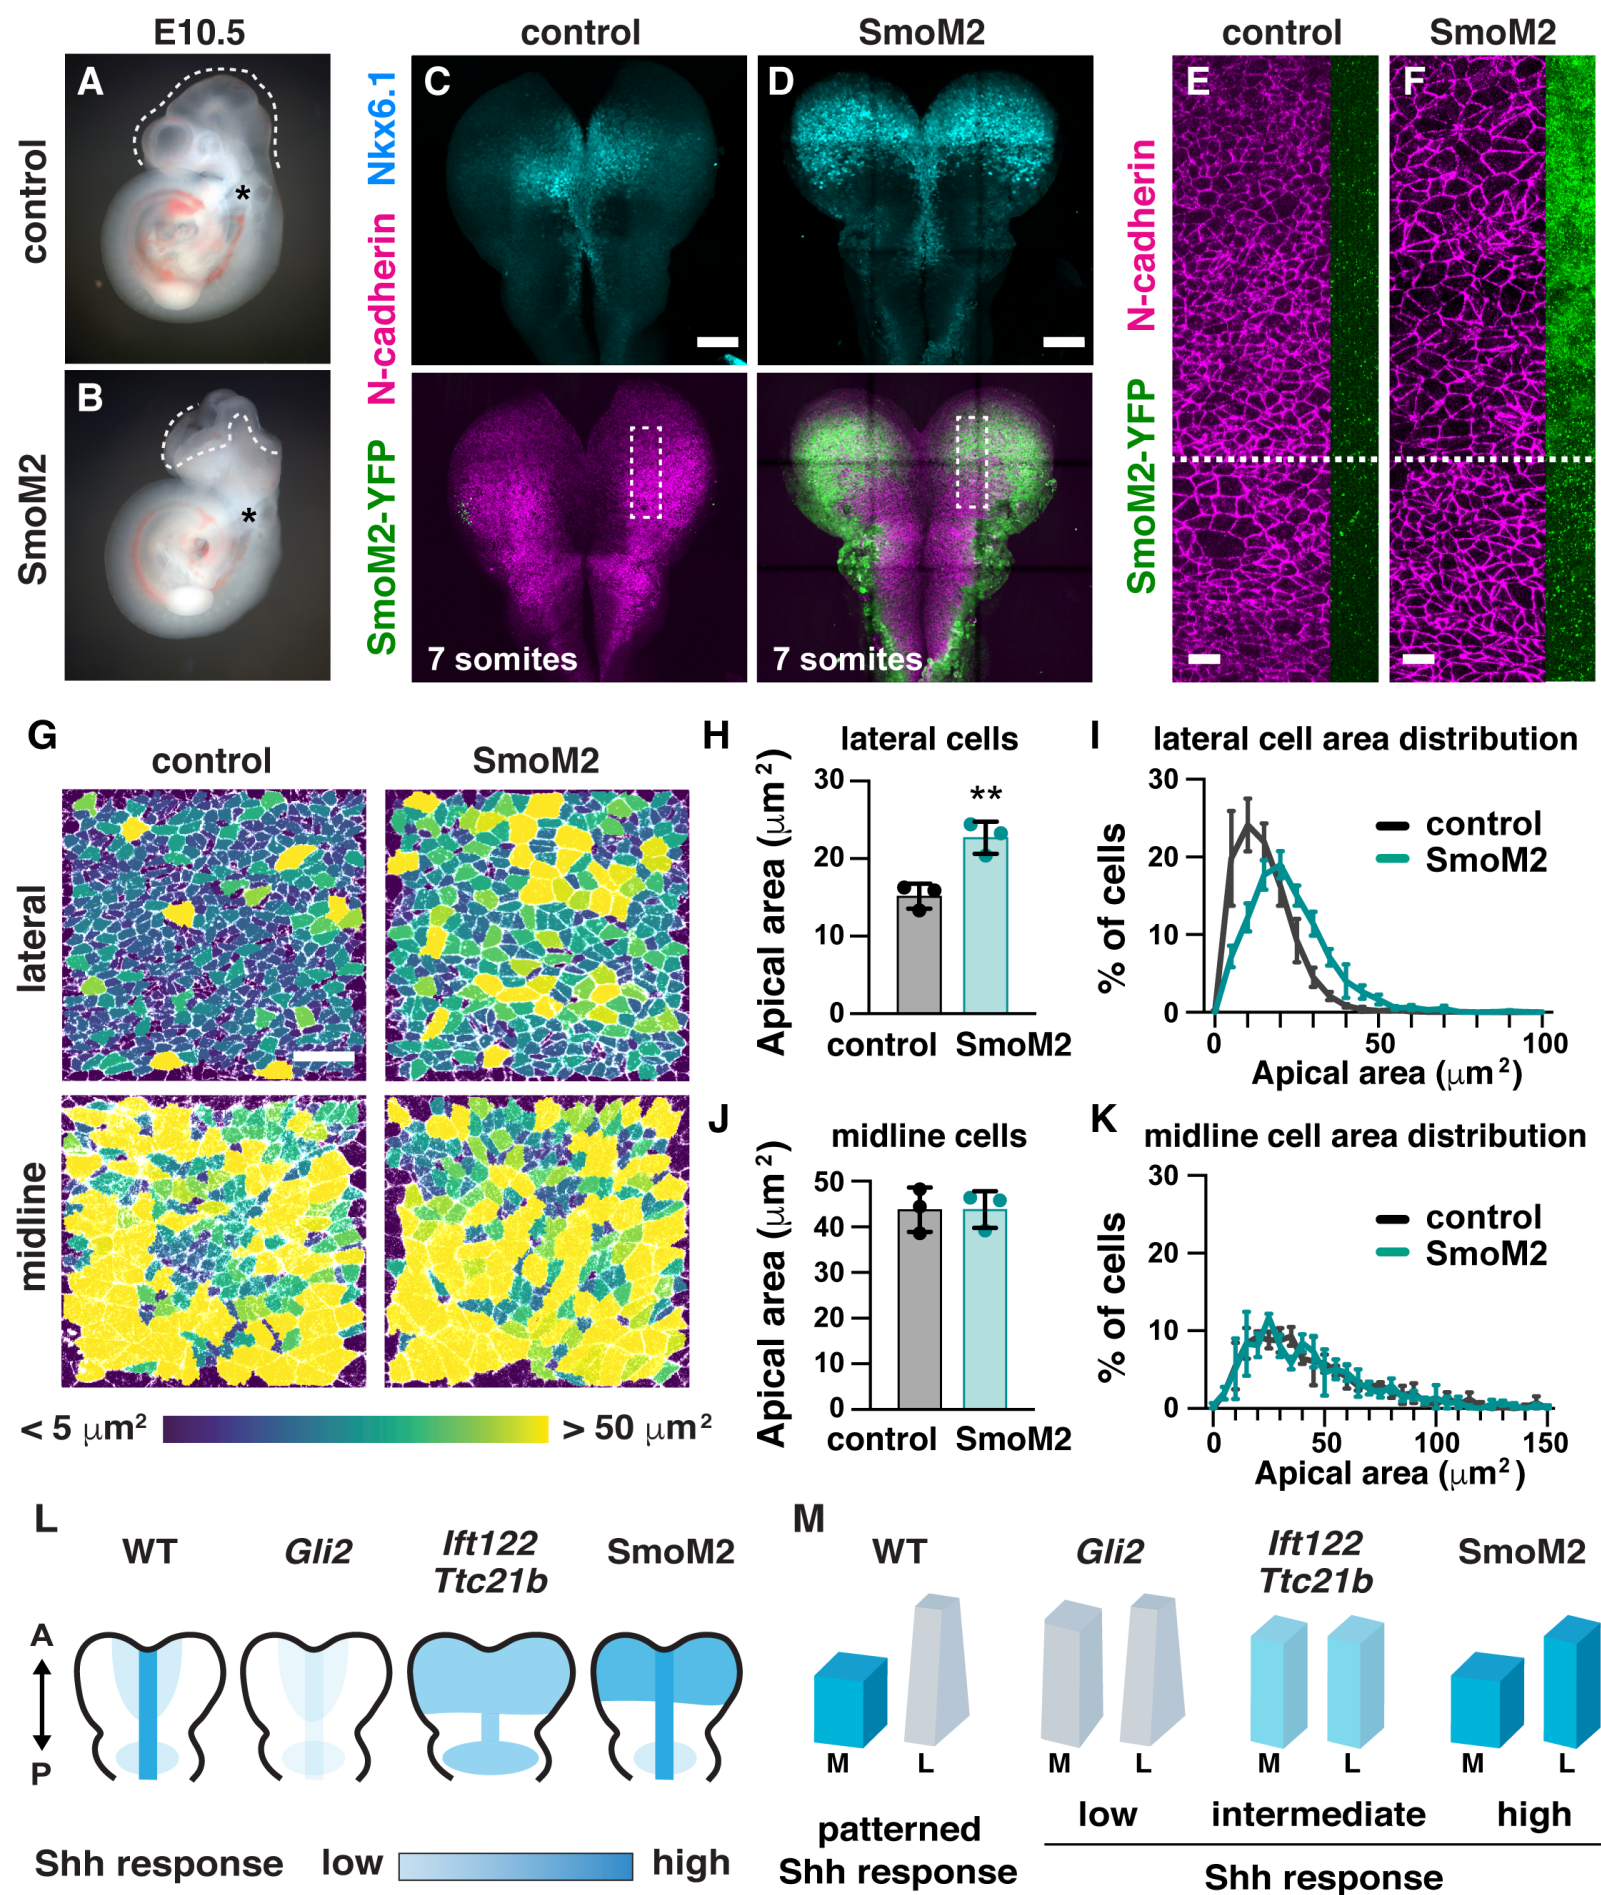

Source: https://www.biorxiv.org/content/10.1101/2020.10.13.337915v1.full.pdf
