# Supplementary material for: Sonic hedgehog signaling directs patterned cell remodeling during cranial neural tube closure
Source: bioRxiv or medRxiv preprint supplement (doi:10.1101/2020.10.13.337915), 2020-10-13

Figure 2 - Supplement 1

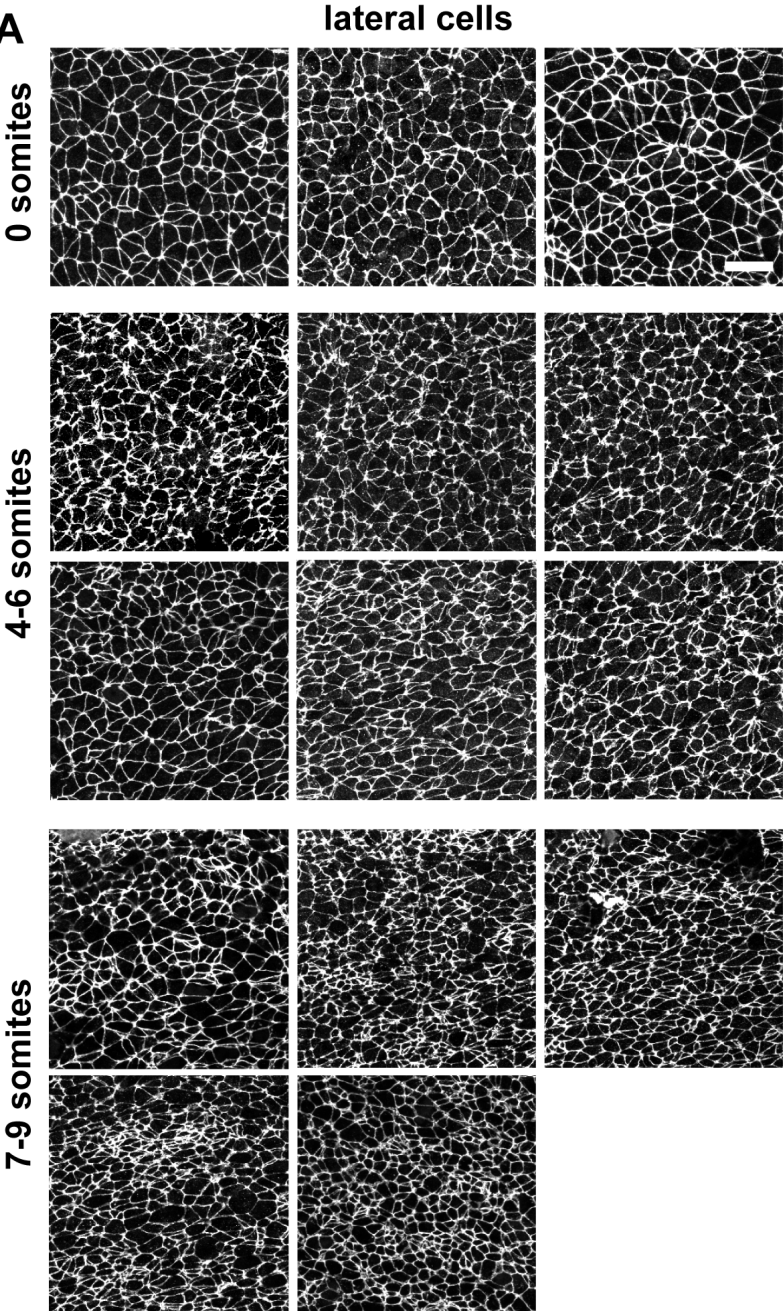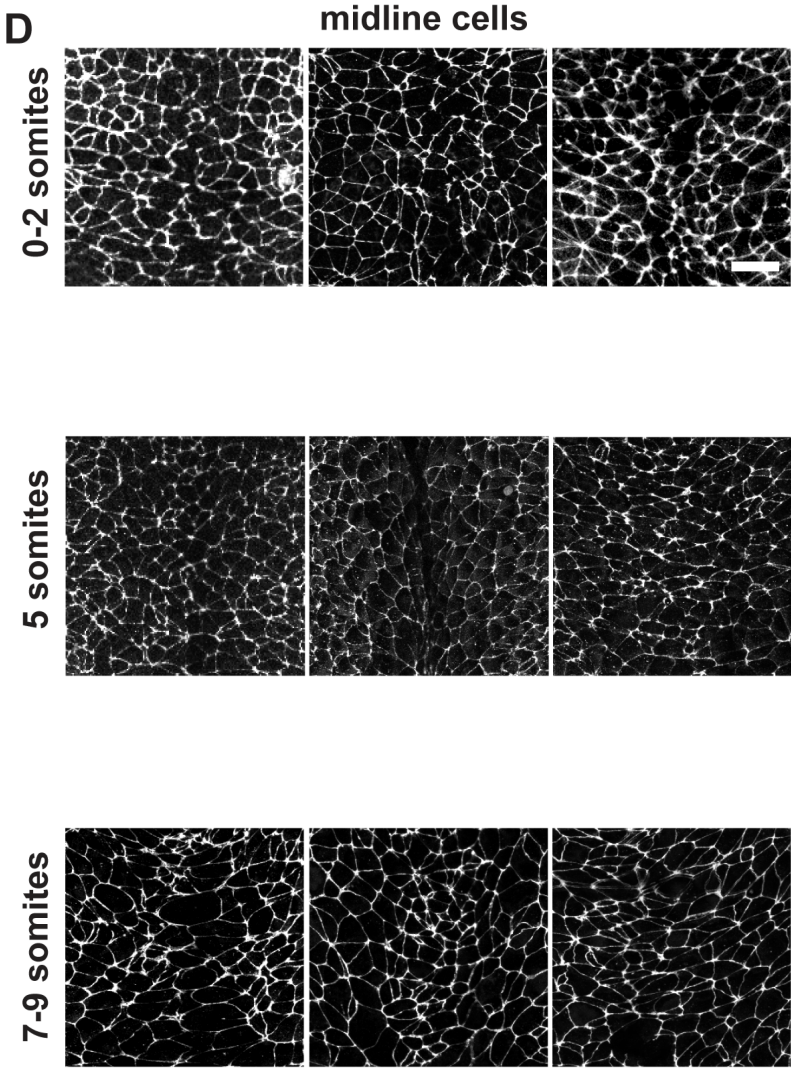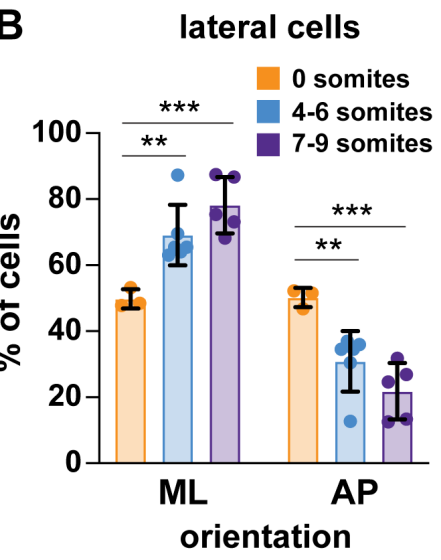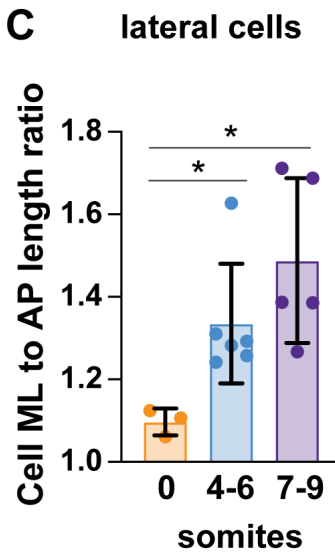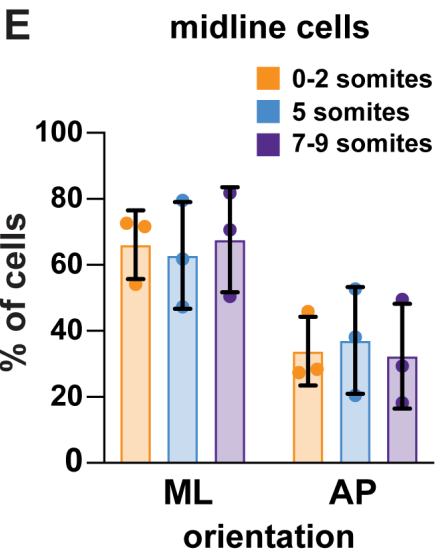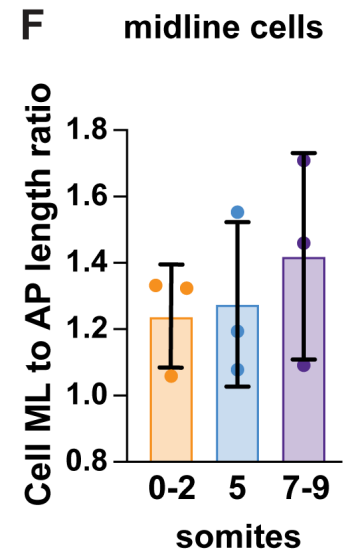

# Figure 3 - Supplement 1

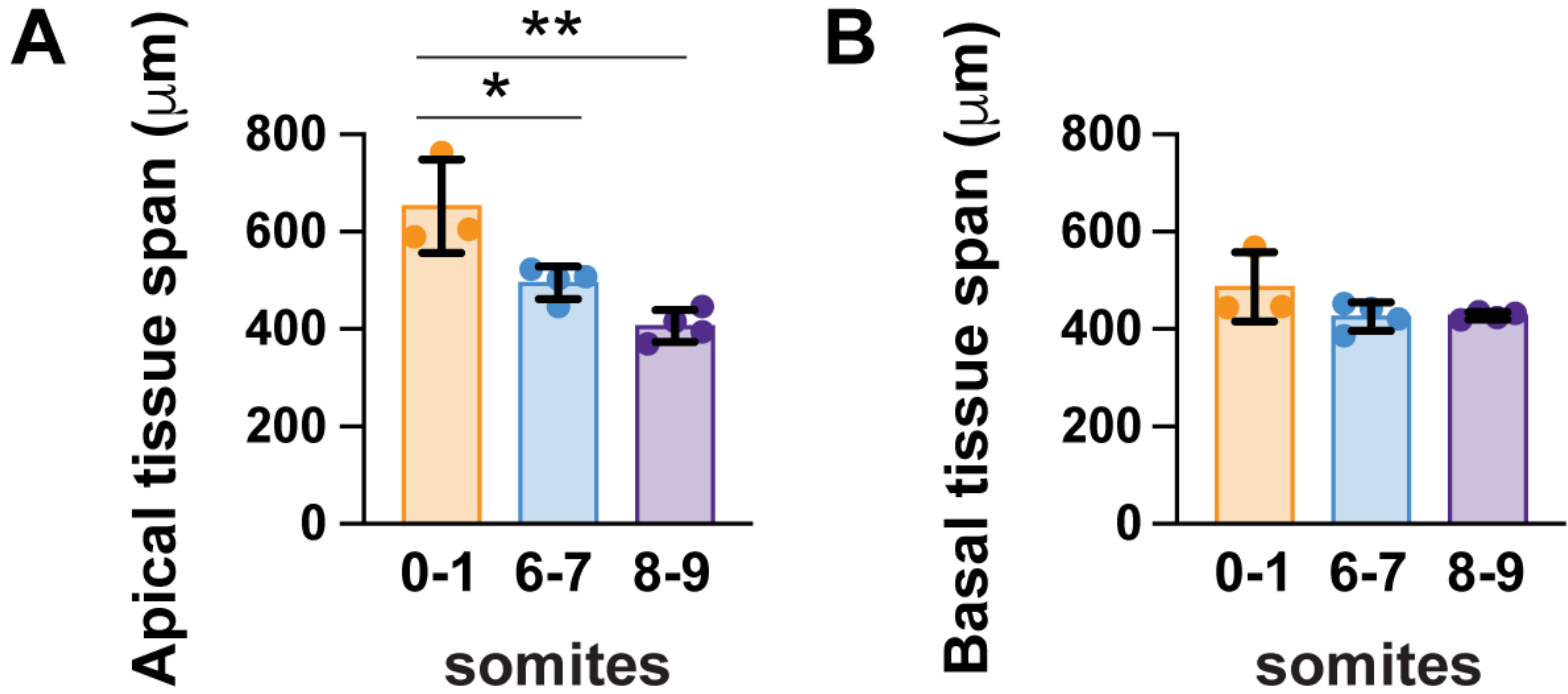

Figure 3 - Supplement 2

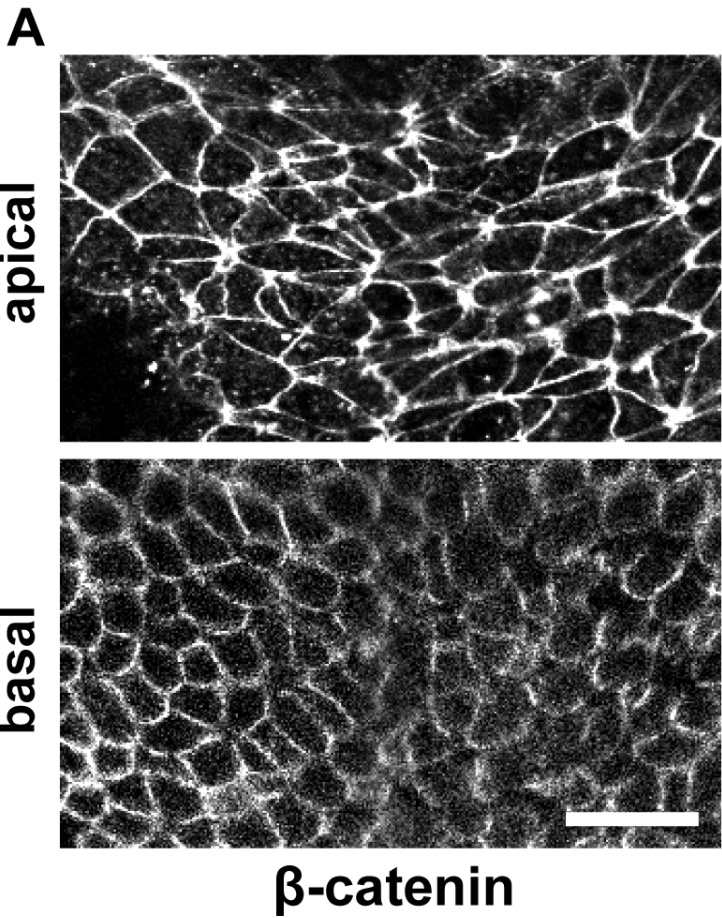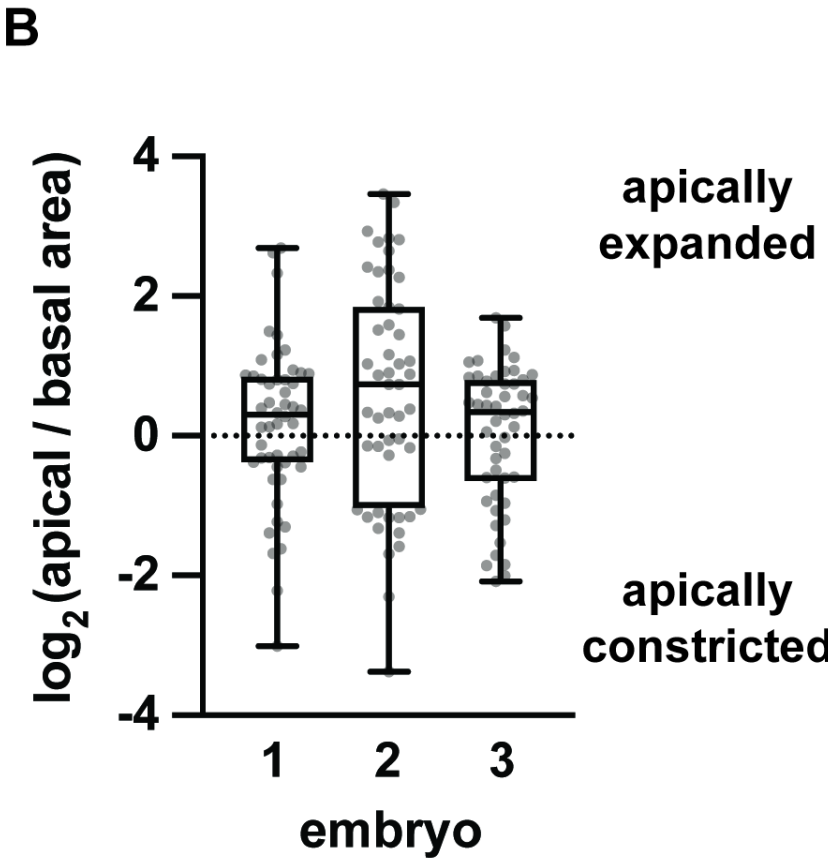

# Figure 4 - Supplement 1

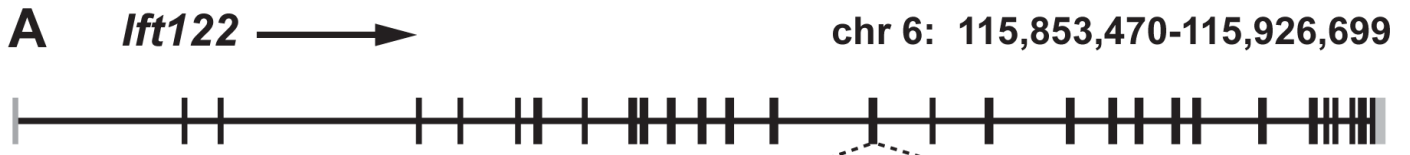

**C > A transversion at nt 115,899,529**      **wild type**      ...GAA GCA TAC CAG ATC...  
 ... E    A    Y    Q    I ...

**Tyr > premature stop at 575 of 1,138 aa**      **TR2**      ...GAA GCA TAA CAG ATC...  
 ... E    A    \*                      ...

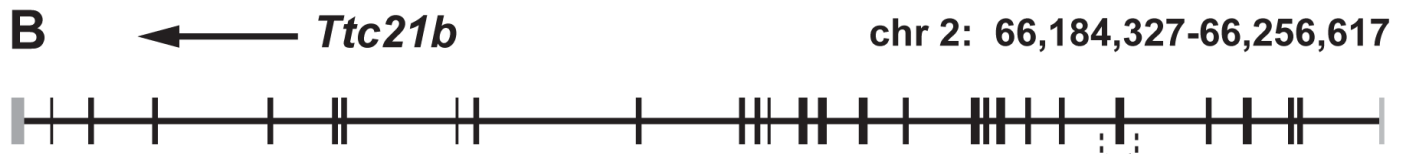

**C > A transversion at nt 66,242,780**      **wild type (reverse)**      ...GTT CTG TGC CTT GAG...  
 ... V    L    C    L    E ...

**Cys > premature stop at 187 of 1,315 aa**      **TF2 (reverse)**      ...GTT CTG TGA CTT GAG...  
 ... V    L    \*                      ...

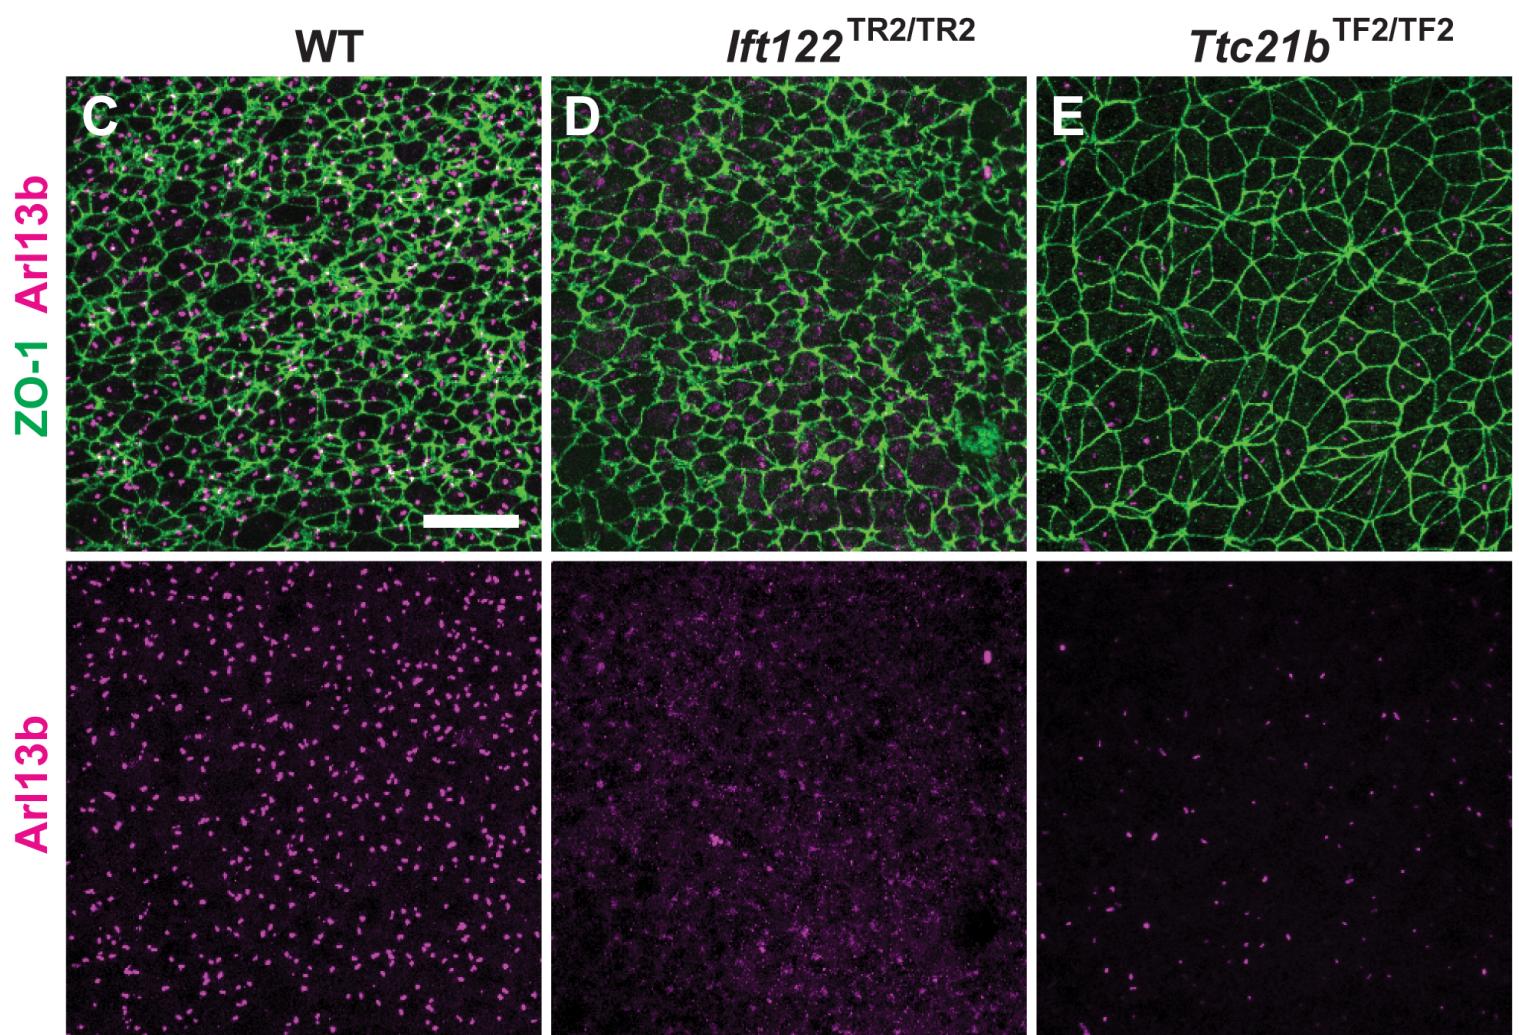

# Figure 4 - Supplement 2

## 7 somites (E8.5)

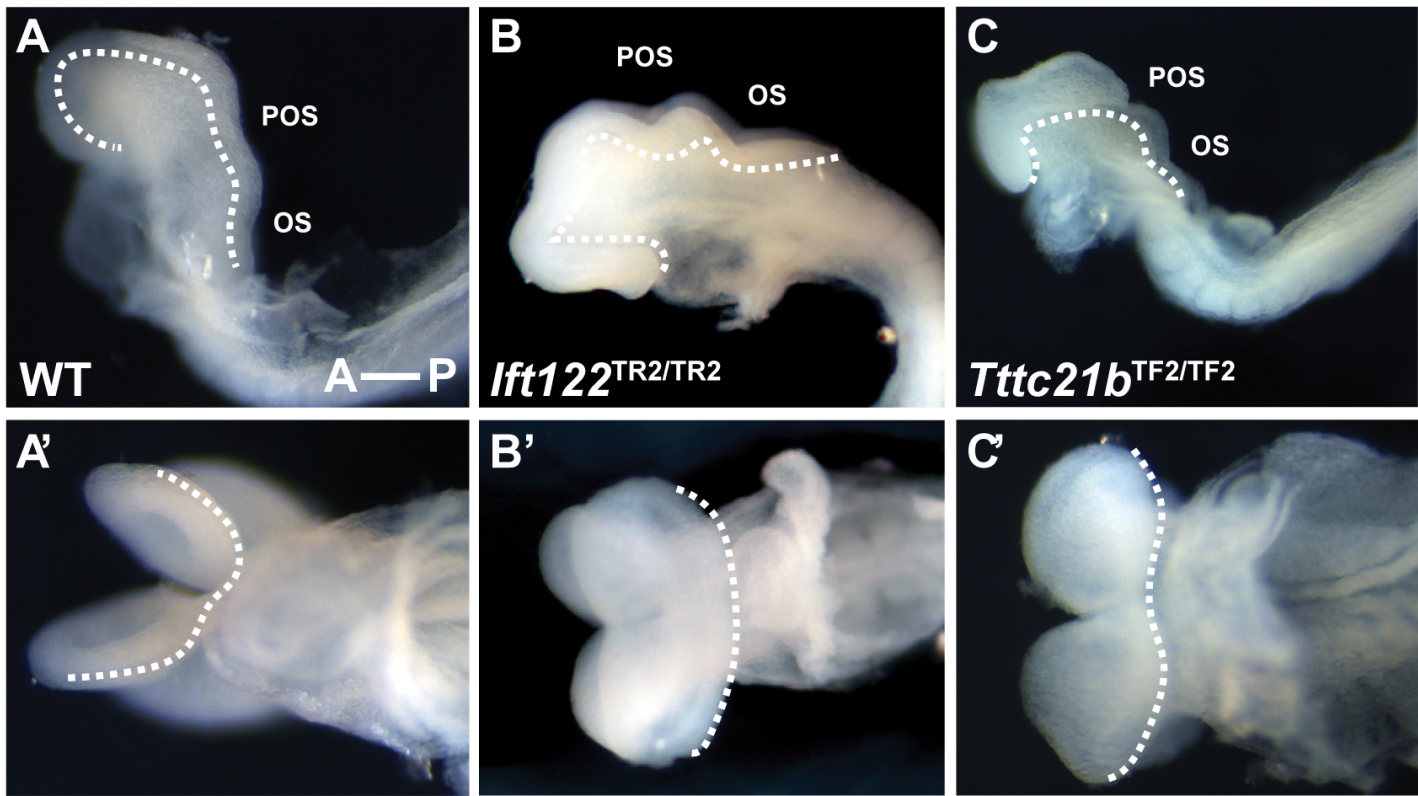

## 12 somites (E8.75)

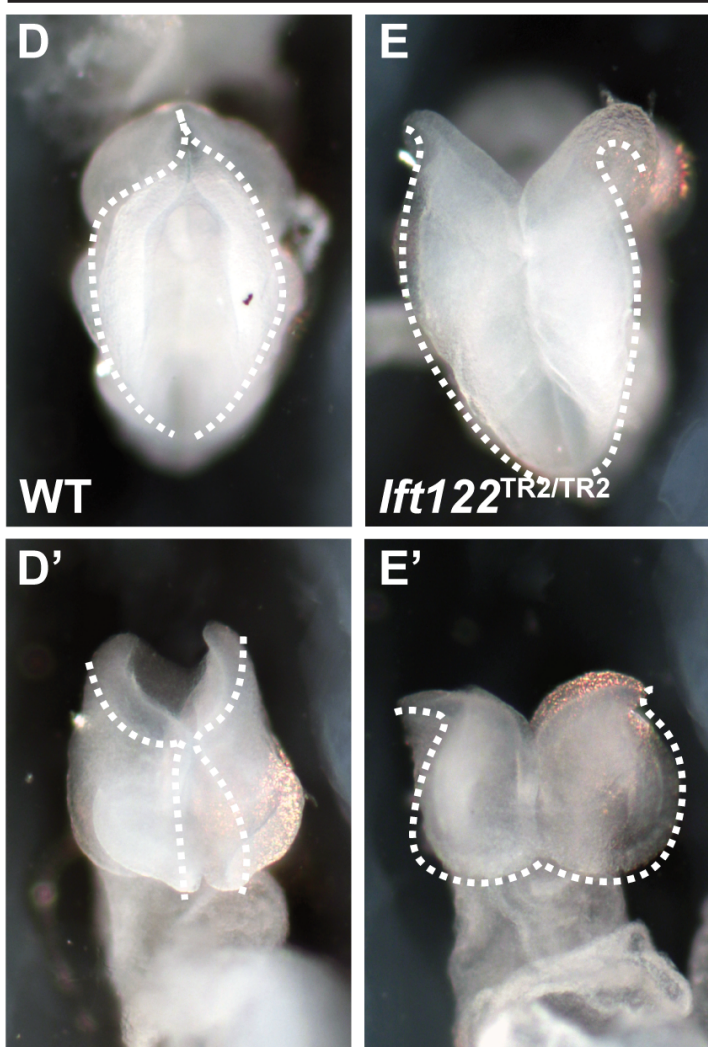

## E9.5

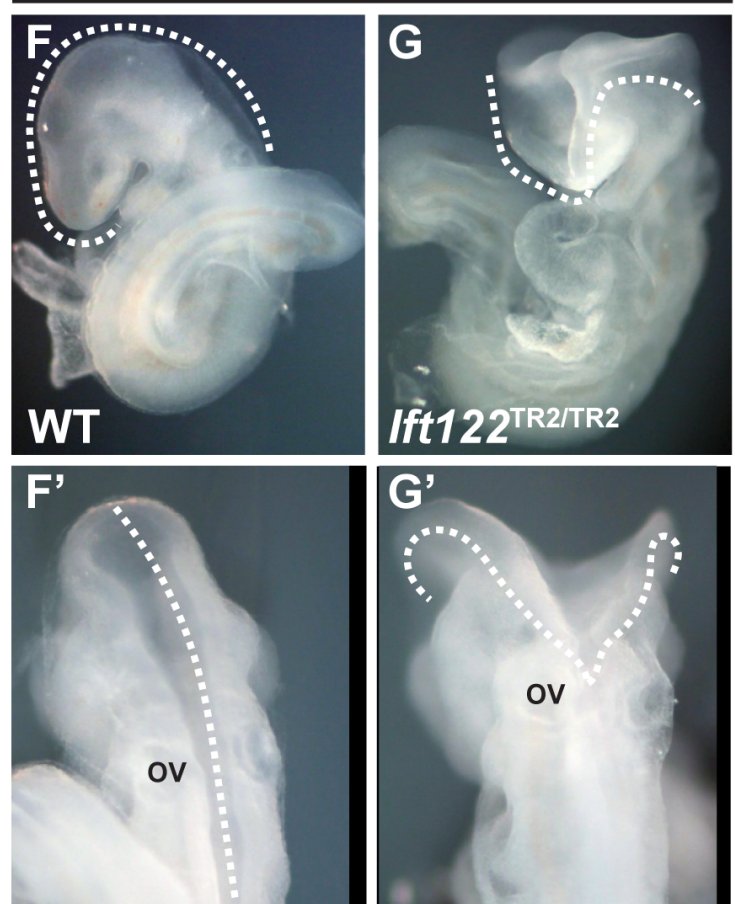

Figure 4 - Supplement 3

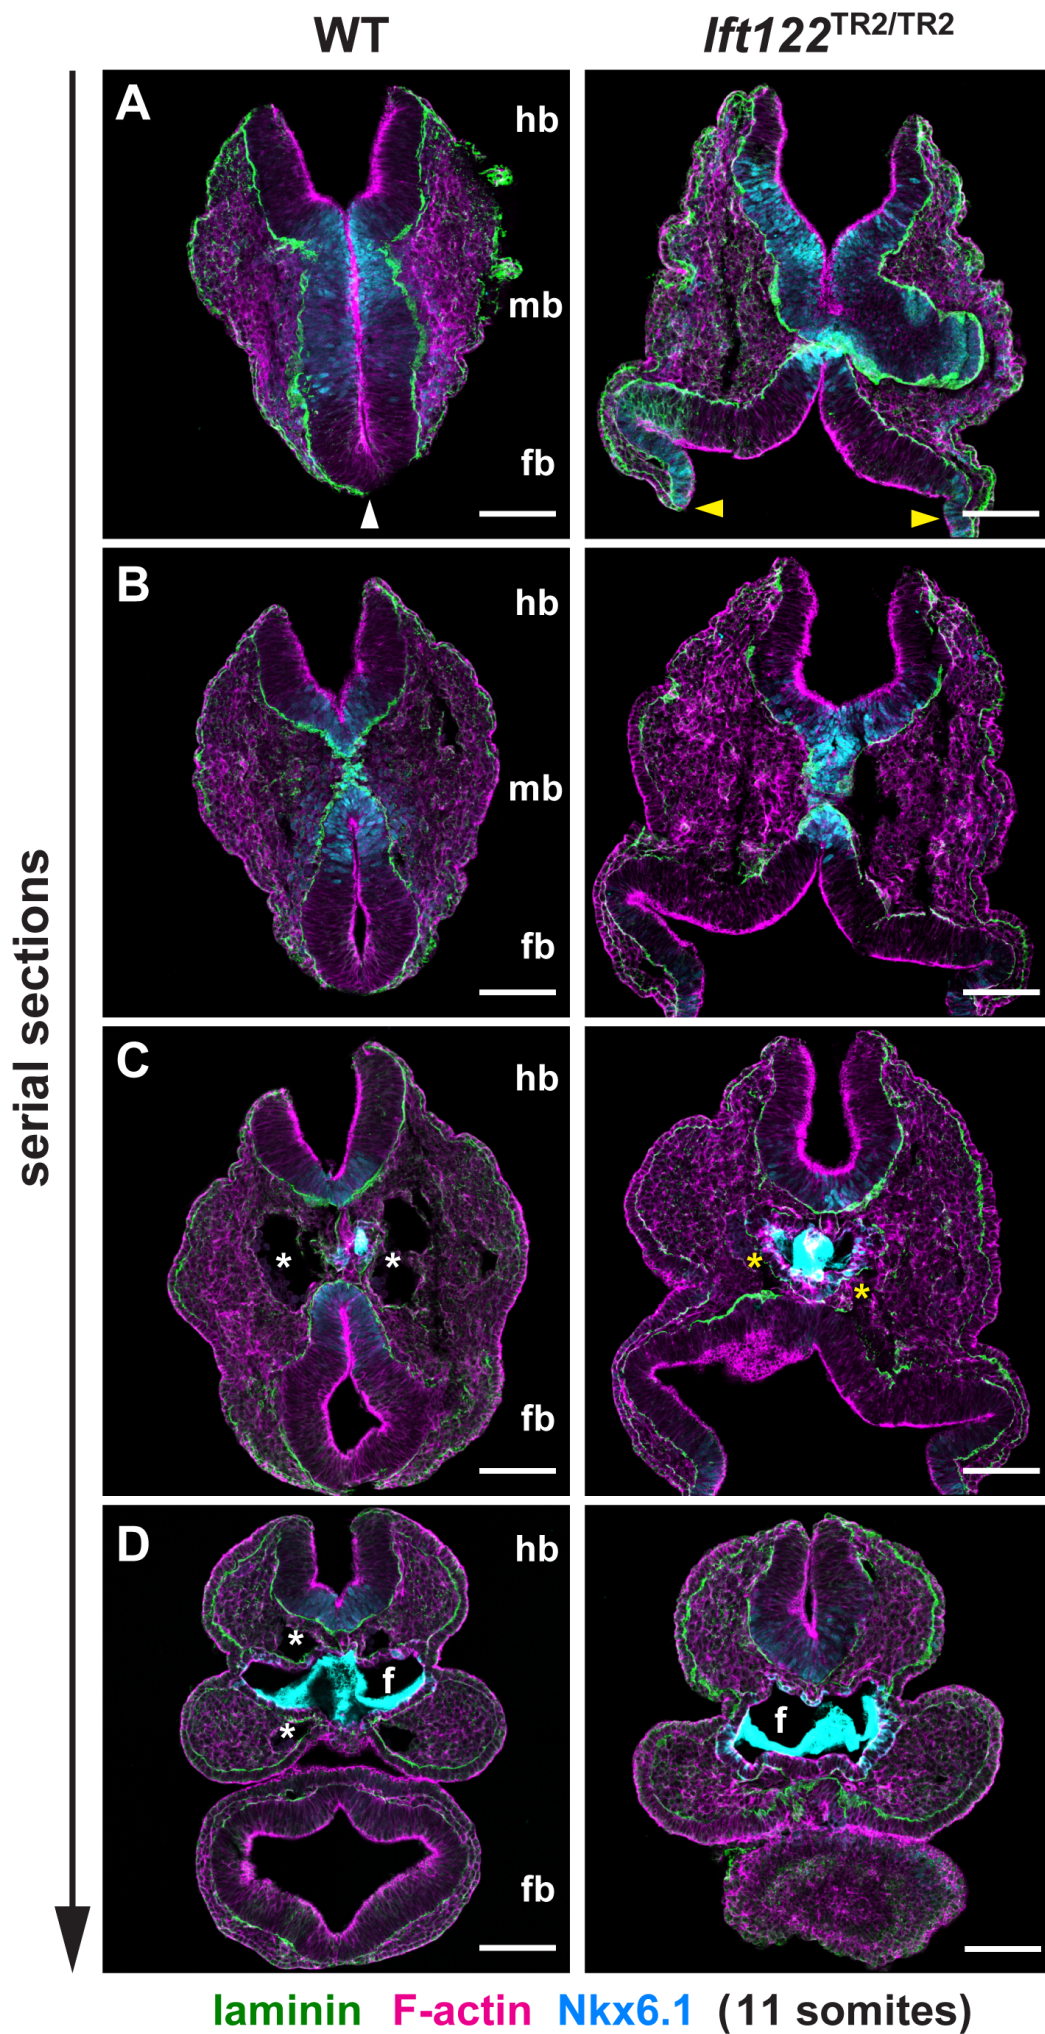

Figure 4 - Supplement 4

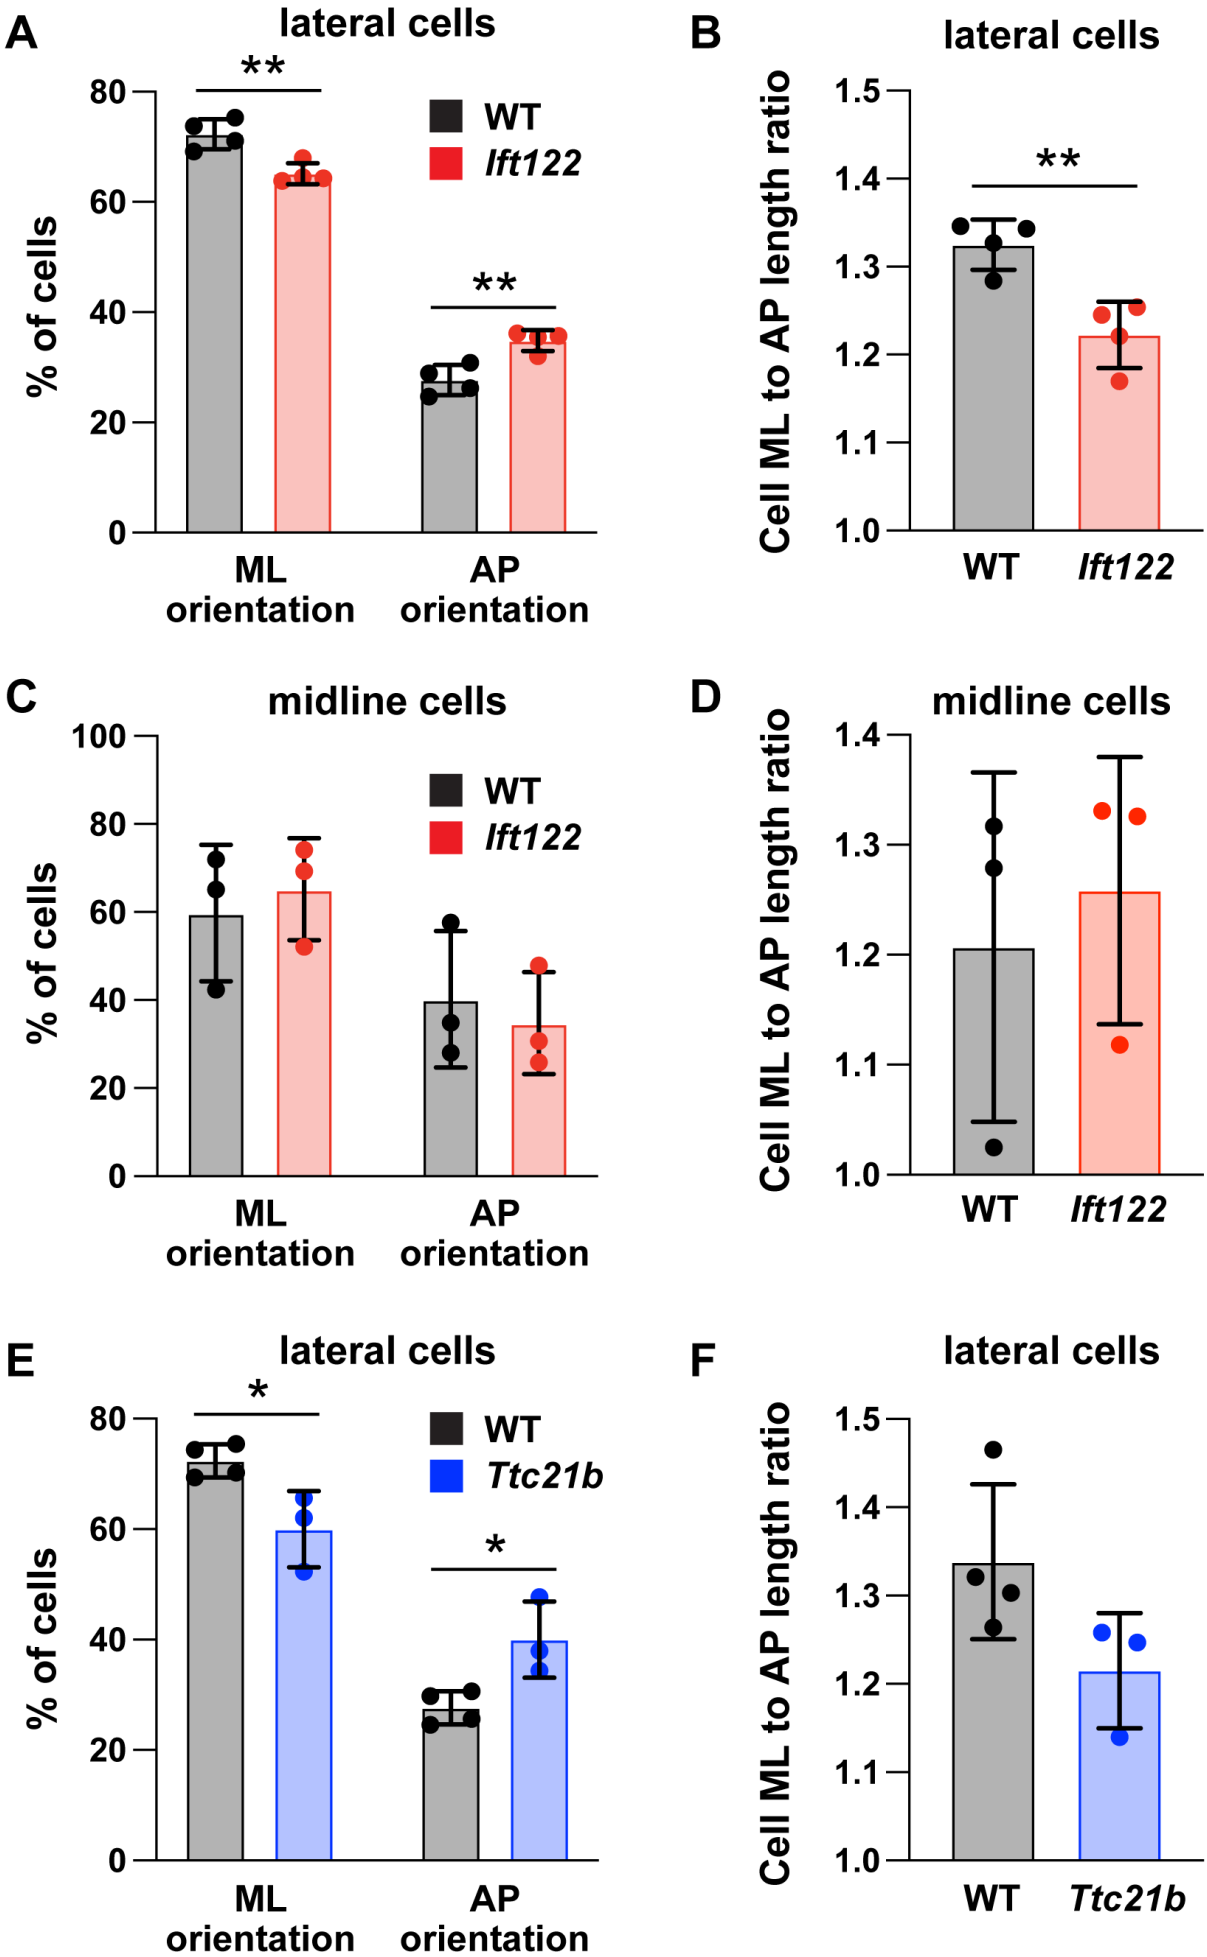

Figure 4 - Supplement 5

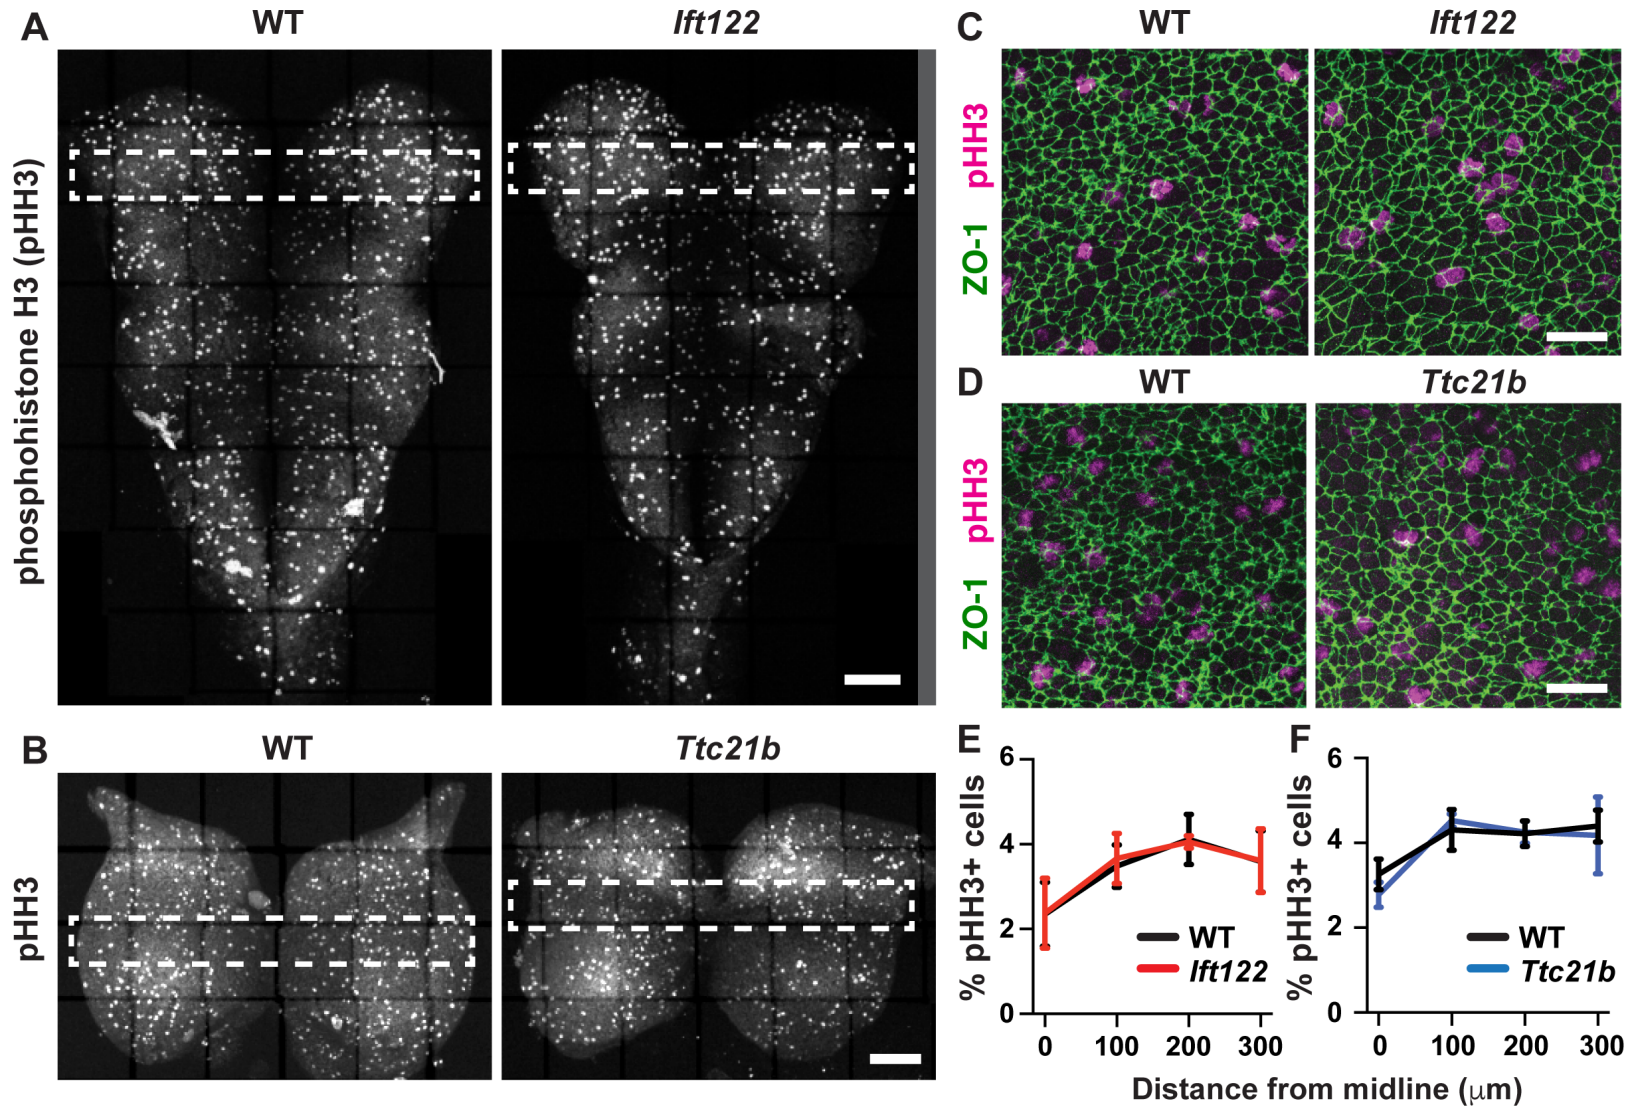



Figure 4 - Supplement 6

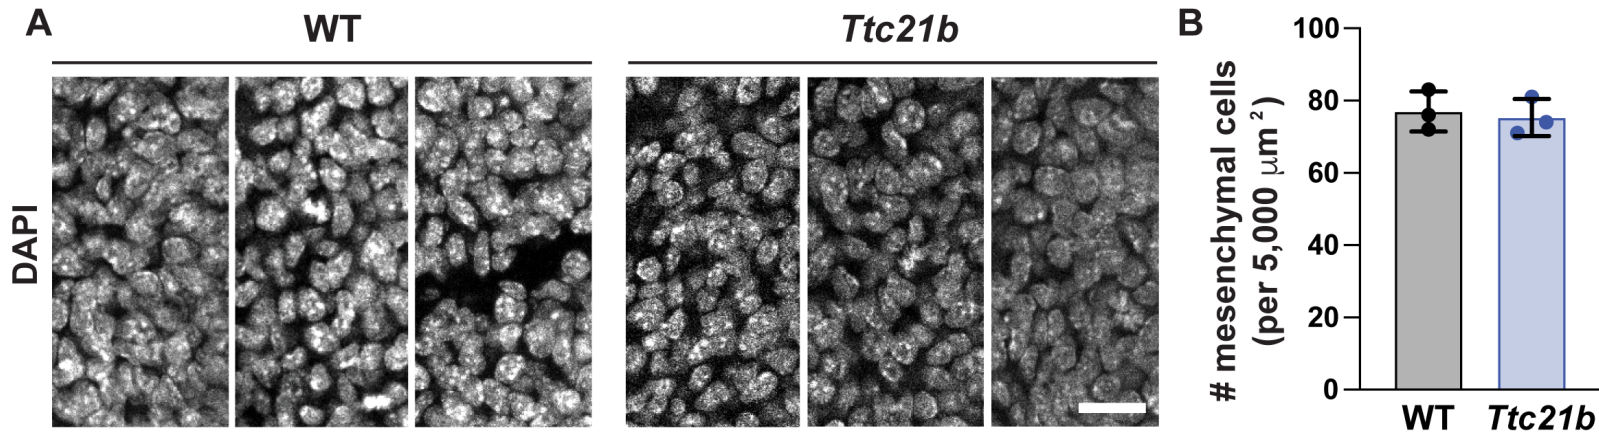

Figure 5 - Supplement 1

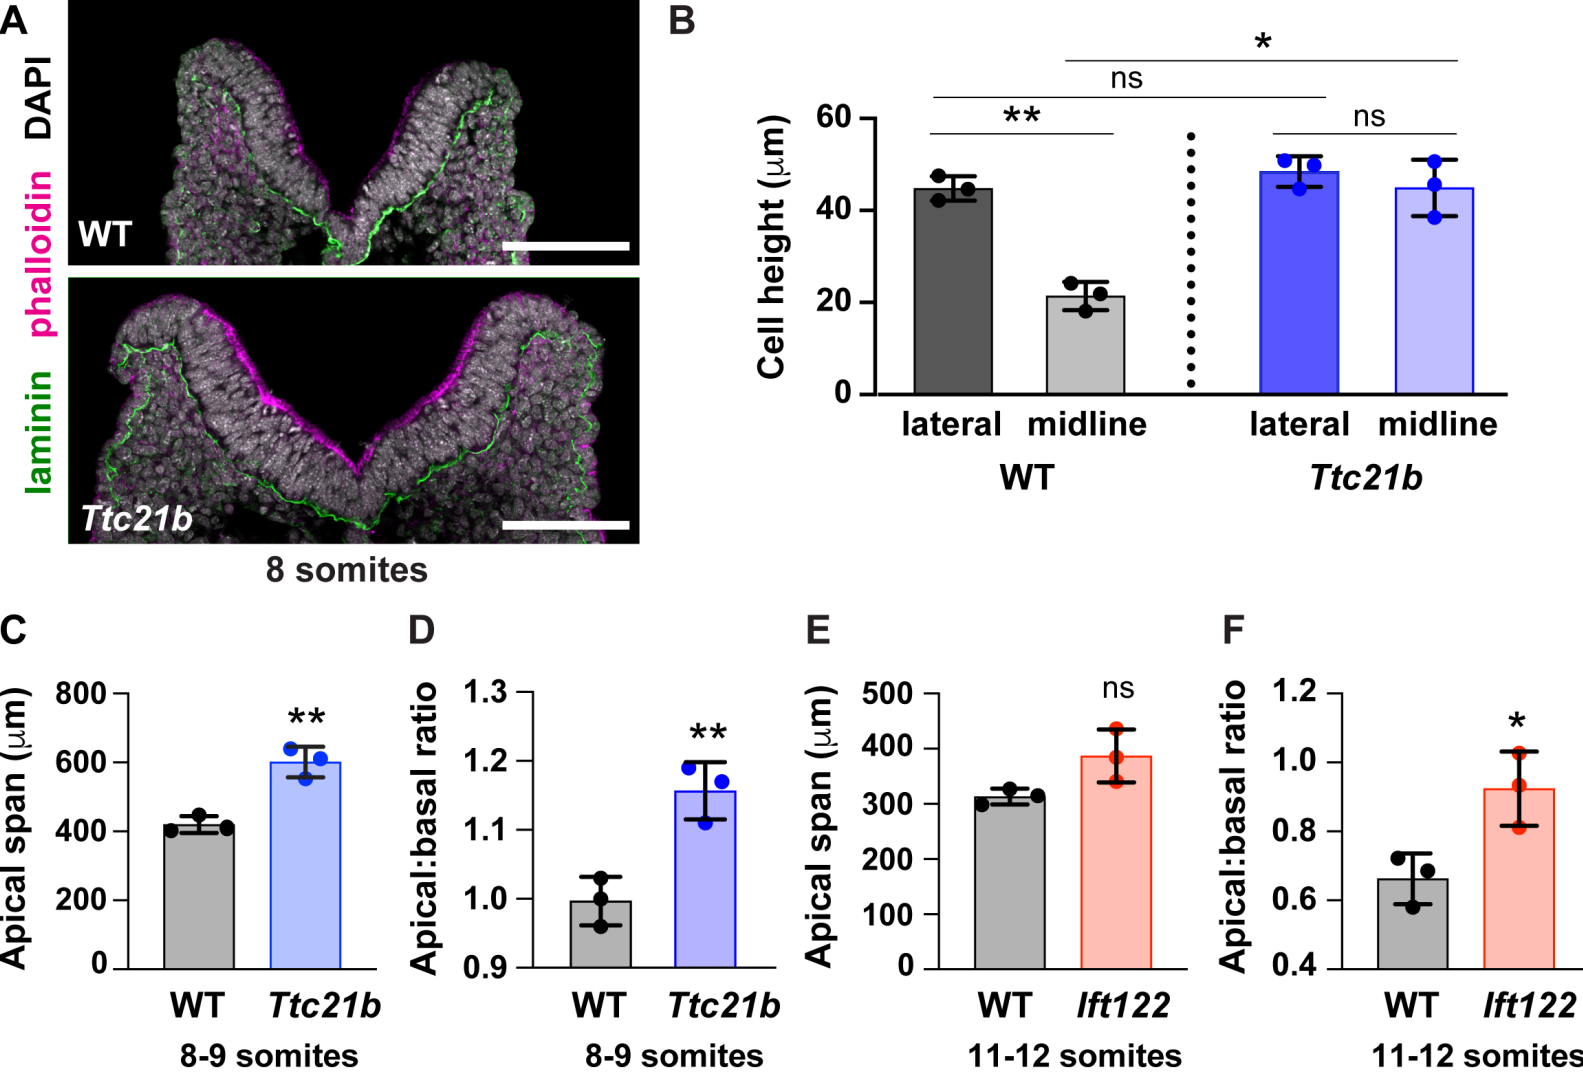

Figure 8 - Supplement 1

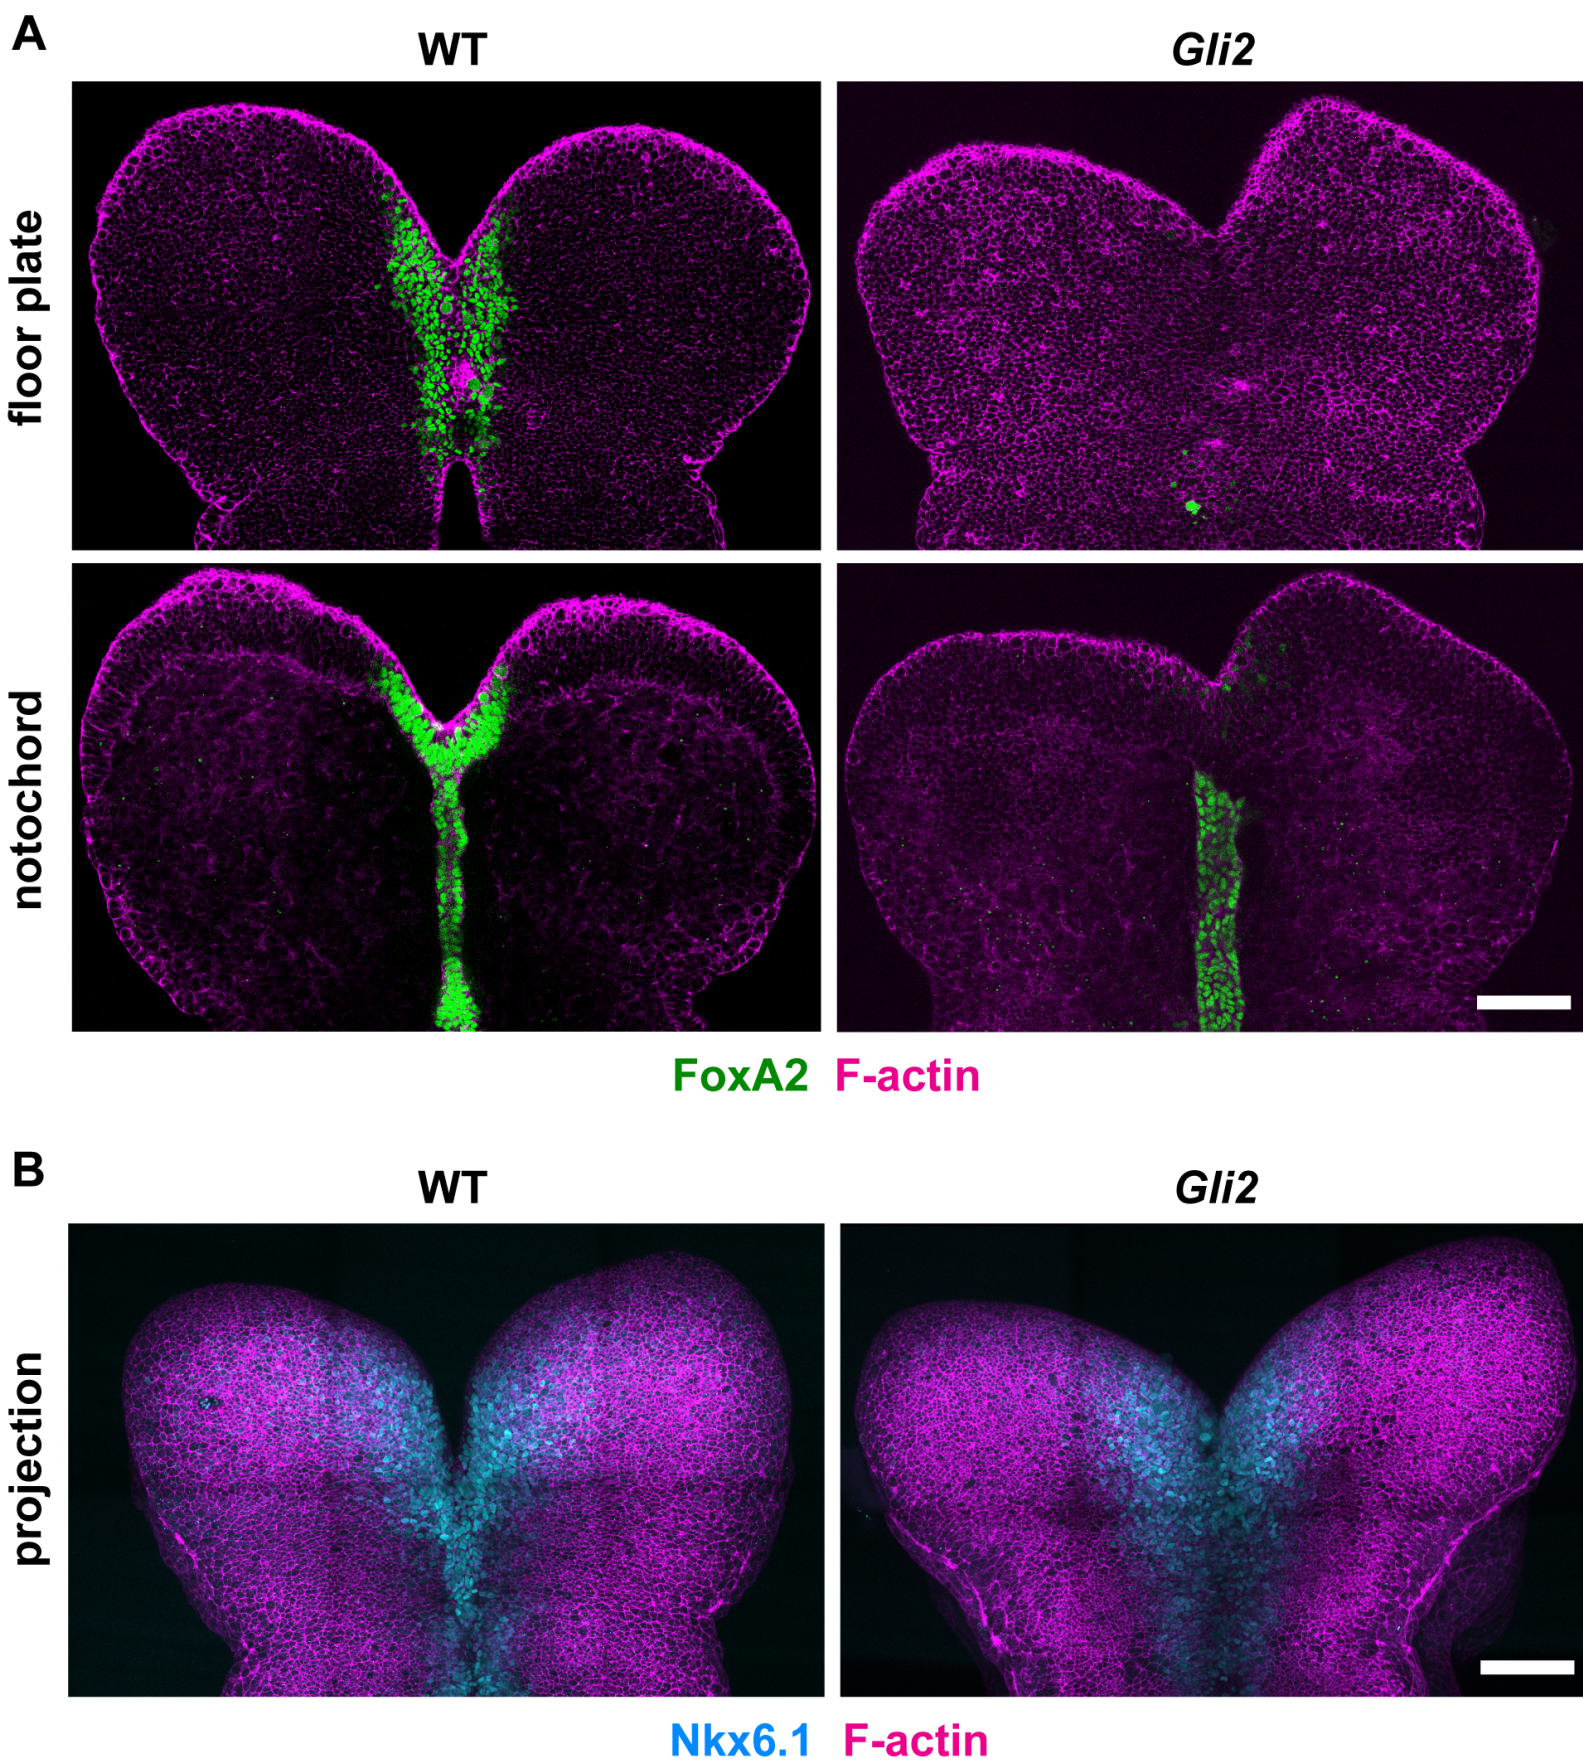

Figure 8 - Supplement 2

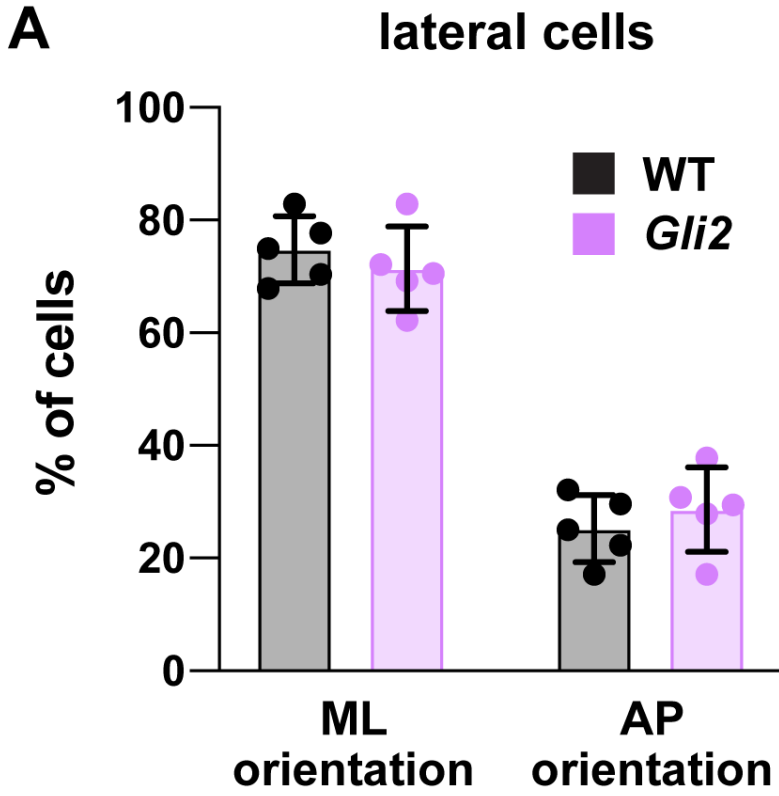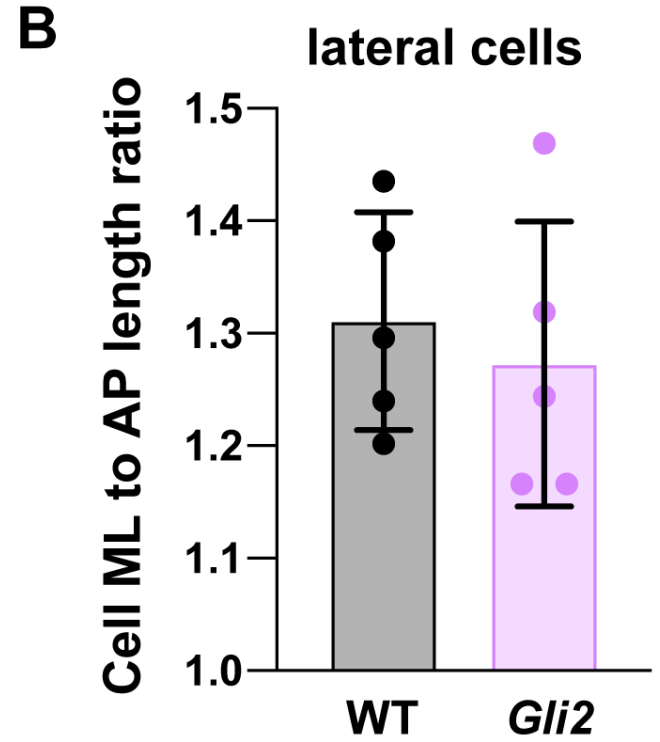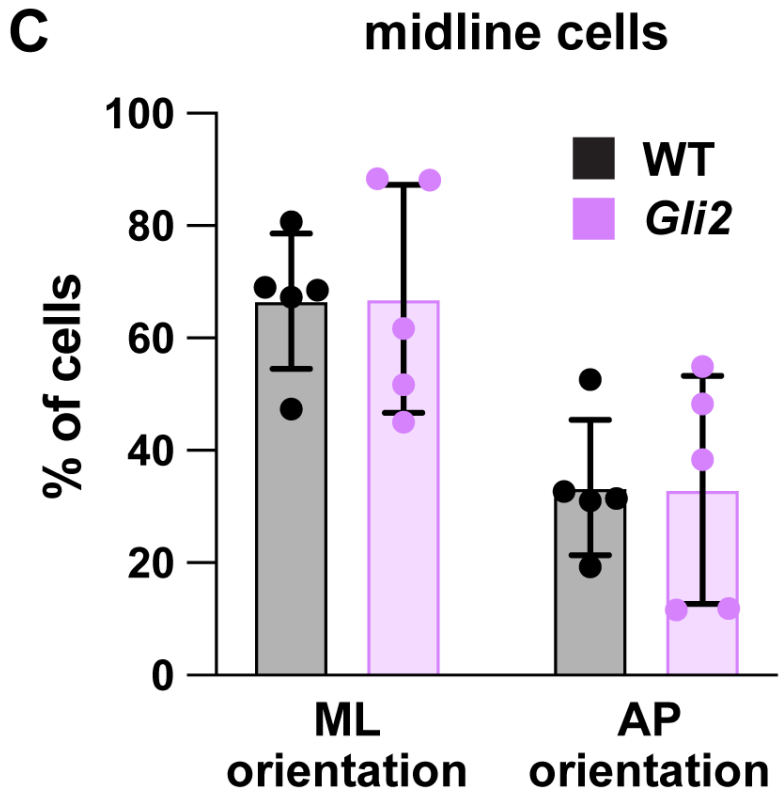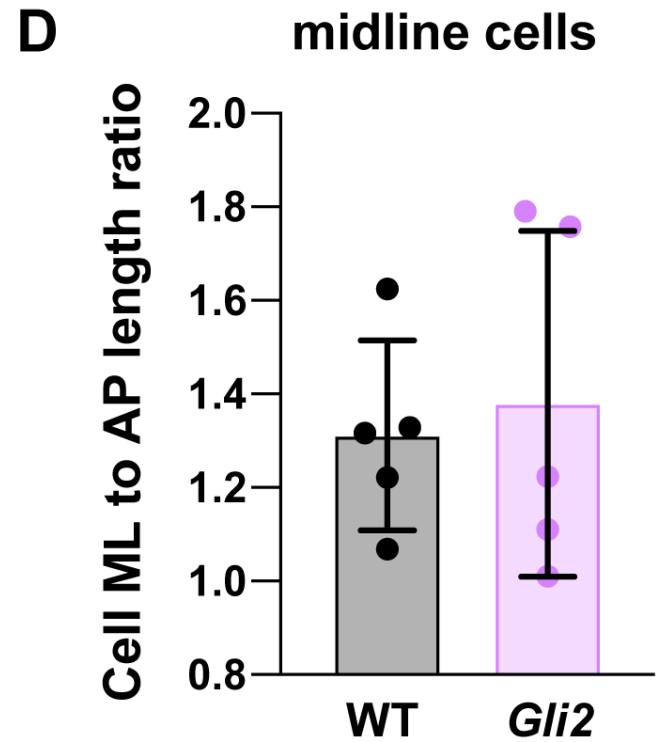

Figure 9 - Supplement 1

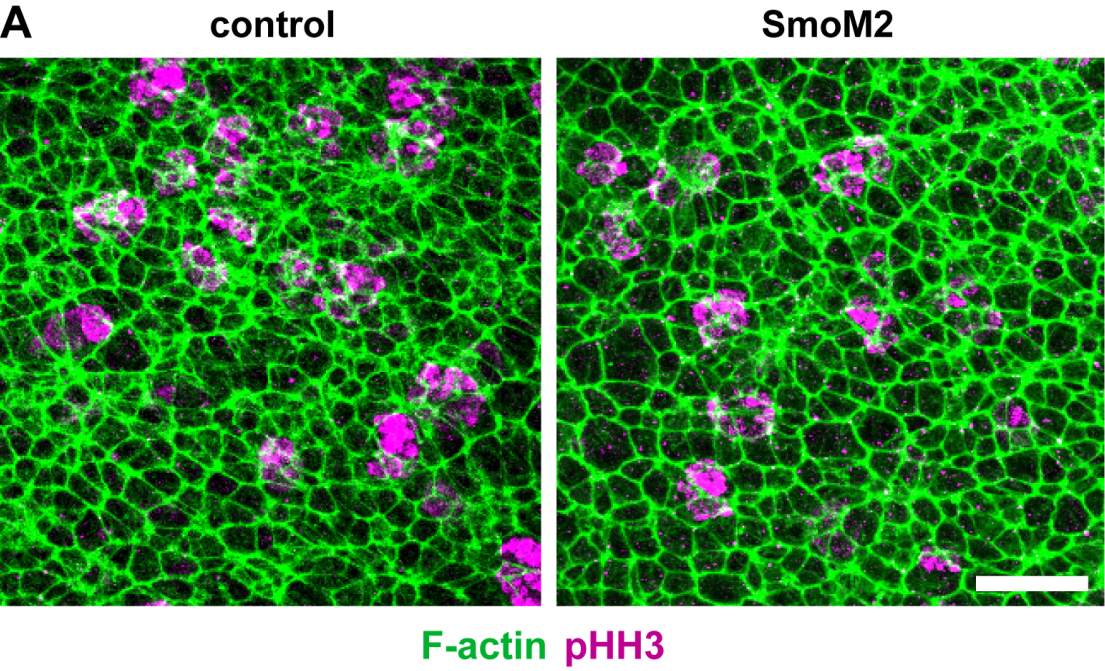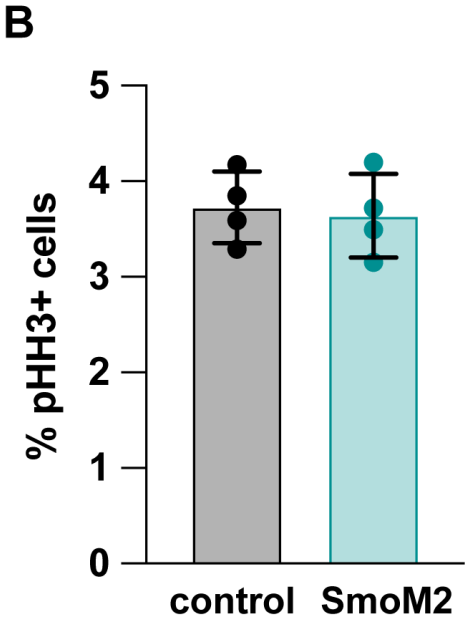

Figure 9 - Supplement 2

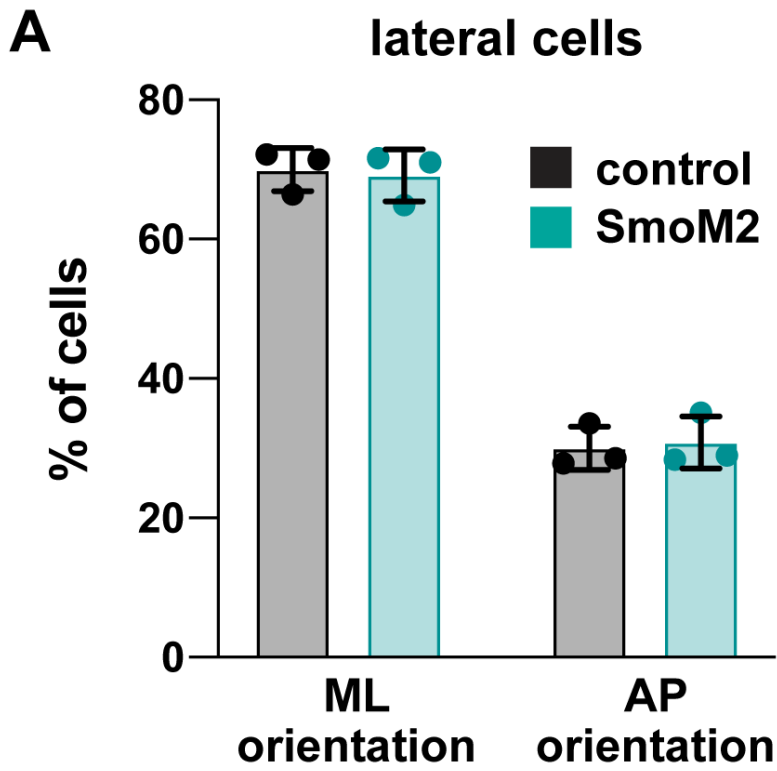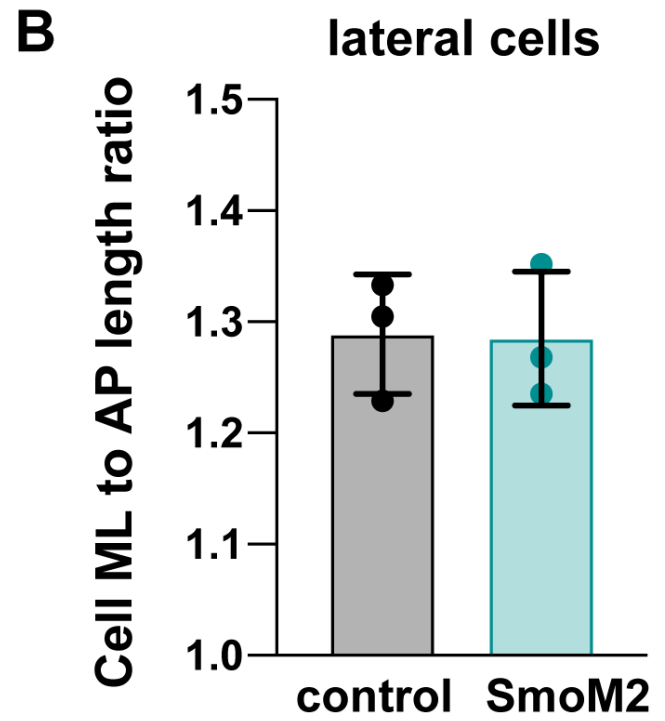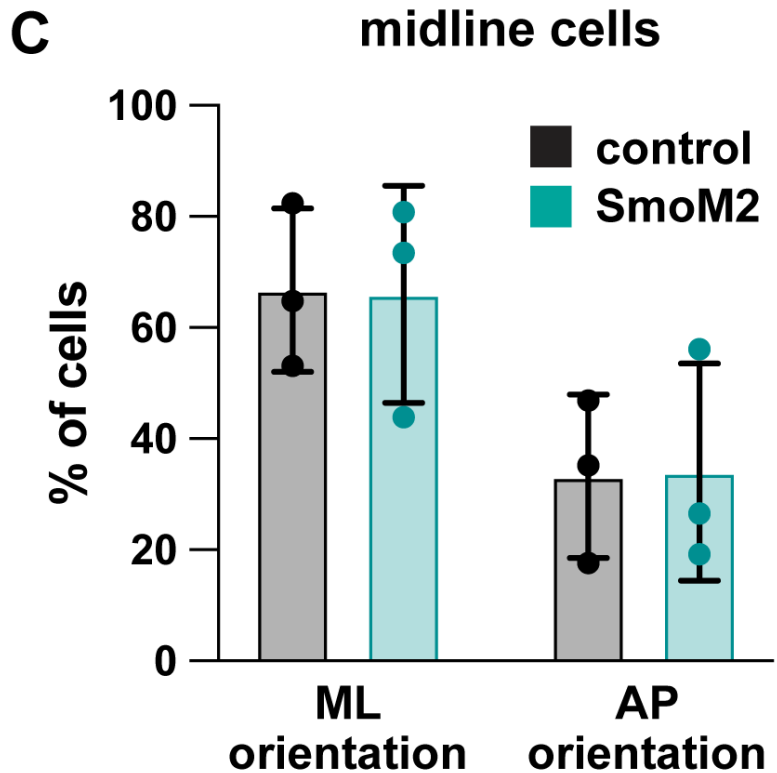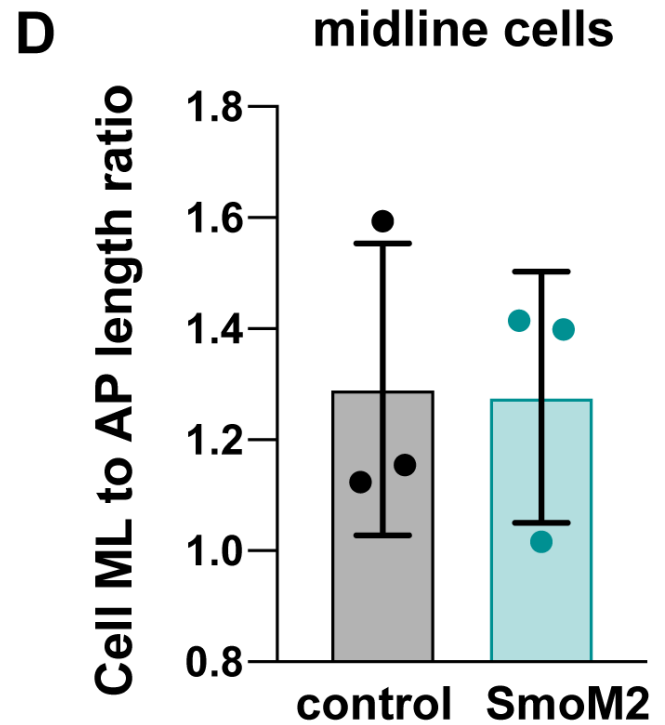

Supplement: Supplementary file [file media-1.pdf]
