# Supplementary material for: Sonic hedgehog signaling directs patterned cell remodeling during cranial neural tube closure
Source: bioRxiv or medRxiv preprint supplement (doi:10.1101/2020.10.13.337915), 2020-10-13
Supplement: Supplementary file [file media-2.pdf]

**Supplementary File 1. N values and details of statistical analyses performed.**

| Figure      | Panel | n                                                           | Mean $\pm$ SD                                  | p                                                          | Statistical test and notes                                                                                  |
|-------------|-------|-------------------------------------------------------------|------------------------------------------------|------------------------------------------------------------|-------------------------------------------------------------------------------------------------------------|
| <b>1</b>    | G, H  | 0 somites: 3 embryos (565, 474, 488 cells)                  | 36.59 $\pm$ 2.20 $\mu\text{m}^2$               | 0 vs. 4-6:<br>p = 0.0027                                   | Brown-Forsythe and Welch One-way ANOVA (Dunnett's T3 multiple comparisons)<br><br>Does not assume equal SDs |
|             |       | 4-6 somites: 6 embryos (857, 761, 825, 718, 667, 889 cells) | 24.86 $\pm$ 2.82 $\mu\text{m}^2$               | 0 vs. 7-9:<br>p = 0.0006<br><br>4-6 vs. 7-9:<br>p = 0.0011 |                                                                                                             |
|             |       | 7-9 somites: 5 embryos (1000, 1270, 1198, 1047, 1377 cells) | 16.62 $\pm$ 2.16 $\mu\text{m}^2$               |                                                            |                                                                                                             |
| <b>2</b>    | B, C  | 0-2 somites: 3 embryos (205, 158, 174 cells)                | 48.25 $\pm$ 4.99 $\mu\text{m}^2$               | 0-2 vs. 5:<br>p = 0.2470                                   | Brown-Forsythe and Welch One-way ANOVA (Dunnett's T3 multiple comparisons)<br><br>Does not assume equal SDs |
|             |       | 5 somites: 3 embryos (205, 231, 197 cells)                  | 41.22 $\pm$ 2.22 $\mu\text{m}^2$               | 0-2 vs. 7-9:<br>p = 0.9781                                 |                                                                                                             |
|             |       | 7-9 somites: 3 embryos (192, 164, 166 cells)                | 49.42 $\pm$ 3.32 $\mu\text{m}^2$               | 5 vs. 7-9:<br>p = 0.0878                                   |                                                                                                             |
| <b>2 S1</b> | B     | 0 somites: 3 embryos (393, 341, 331 cells)                  | ML: 49.81 $\pm$ 2.97%<br>AP: 50.19 $\pm$ 2.97% | 0 vs. 4-6:<br>p = 0.0085                                   | Two-way ANOVA (Sidak's multiple comparisons)                                                                |
|             |       | 4-6 somites: 6 embryos (447, 595, 632, 517, 566, 484 cells) | ML: 69.15 $\pm$ 9.18%<br>AP: 30.85 $\pm$ 9.18% | 0 vs. 7-9:<br>p = 0.0003                                   |                                                                                                             |
|             |       | 7-9 somites: 5 embryos (552, 711, 979, 799, 915 cells)      | ML: 78.17 $\pm$ 8.52%<br>AP: 21.83 $\pm$ 8.52% | 4-6 vs. 7-9:<br>p = 0.2228                                 |                                                                                                             |
|             | C     | 0 somites: 3 embryos (393, 341, 331 cells)                  | 1.10 $\pm$ 0.03                                | 0 vs. 4-6:<br>p = 0.0233                                   | Brown-Forsythe and Welch One-way ANOVA                                                                      |

|          |          |                                                             |                                          |                            |                                                                            |
|----------|----------|-------------------------------------------------------------|------------------------------------------|----------------------------|----------------------------------------------------------------------------|
|          |          | 4-6 somites: 6 embryos (447, 595, 632, 517, 566, 484 cells) | 1.34 ± 0.15                              | 0 vs. 7-9:<br>p = 0.0322   | (Dunnett's T3 multiple comparisons)                                        |
|          |          | 7-9 somites: 5 embryos (552, 711, 979, 799, 915 cells)      | 1.49 ± 0.19                              | 4-6 vs. 7-9:<br>p = 0.4490 | Does not assume equal SDs                                                  |
|          | <b>E</b> | 0 somites: 3 embryos (134, 109, 96 cells)                   | ML: 66.12 ± 10.41%<br>AP: 33.86 ± 10.41% | 0 vs. 4-6:<br>p > 0.9999   | Two-way ANOVA (Sidak's multiple comparisons)                               |
|          |          | 4-6 somites: 3 embryos (132, 148, 131 cells)                | ML: 62.89 ± 16.14%<br>AP: 37.10 ± 16.14% | 0 vs. 7-9:<br>p > 0.9999   |                                                                            |
|          |          | 7-9 somites: 3 embryos (121, 107, 102 cells)                | ML: 67.62 ± 15.89%<br>AP: 32.37 ± 15.89% | 4-6 vs. 7-9:<br>p > 0.9999 |                                                                            |
|          | <b>F</b> | 0 somites: 3 embryos (134, 109, 96 cells)                   | 1.24 ± 0.16                              | 0 vs. 5:<br>p = 0.9939     | Brown-Forsythe and Welch One-way ANOVA (Dunnett's T3 multiple comparisons) |
|          |          | 4-6 somites: 6 embryos (132, 148, 131 cells)                | 1.28 ± 0.25                              | 0 vs. 7-9:<br>p = 0.7590   |                                                                            |
|          |          | 7-9 somites: 5 embryos (121, 107, 102 cells)                | 1.42 ± 0.31                              | 5 vs. 7-9:<br>p = 0.8903   |                                                                            |
| <b>3</b> | <b>B</b> | 0-1 somite: 3 embryos                                       | 1.34 ± 0.02                              | 0-1 vs. 6-7:<br>p = 0.0023 | One-way ANOVA (Tukey's multiple comparisons)                               |
|          |          | 6-7 somites: 4 embryos                                      | 1.16 ± 0.02                              | 0-1 vs. 8-9:<br>p < 0.0001 |                                                                            |
|          |          | 8-9 somites: 4 embryos                                      | 0.95 ± 0.07                              | 6-7 vs. 8-9:<br>p = 0.0004 |                                                                            |
|          |          |                                                             |                                          |                            |                                                                            |

|             |          |                                                                                   |                                                               |                                                                                                |                                              |
|-------------|----------|-----------------------------------------------------------------------------------|---------------------------------------------------------------|------------------------------------------------------------------------------------------------|----------------------------------------------|
|             | <b>C</b> | 0-1 somite: 3 embryos<br><br>6-7 somites: 4 embryos<br><br>8-9 somites: 4 embryos | 32.94 ± 3.59 μm<br><br>30.84 ± 2.18 μm<br><br>51.74 ± 3.21 μm | 0-1 vs. 6-7:<br>p = 0.6438<br><br>0-1 vs. 8-9:<br>p < 0.0001<br><br>6-7 vs. 8-9:<br>p < 0.0001 | One-way ANOVA (Tukey's multiple comparisons) |
|             | <b>D</b> | 0-1 somite: 3 embryos<br><br>6-7 somites: 4 embryos<br><br>8-9 somites: 4 embryos | 18.38 ± 3.34 μm<br><br>18.68 ± 2.22 μm<br><br>30.40 ± 1.90 μm | 0-1 vs. 6-7:<br>p = 0.9858<br><br>0-1 vs. 8-9:<br>p = 0.0005<br><br>6-7 vs. 8-9:<br>p = 0.0004 | One-way ANOVA (Tukey's multiple comparisons) |
|             | <b>E</b> | 0-1 somite: 3 embryos<br><br>6-7 somites: 4 embryos<br><br>8-9 somites: 4 embryos | 1.81 ± 0.13<br><br>1.67 ± 0.25<br><br>1.71 ± 0.20             | 0-1 vs. 6-7:<br>p = 0.6798<br><br>0-1 vs. 8-9:<br>p = 0.8234<br><br>6-7 vs. 8-9:<br>p = 0.9587 | One-way ANOVA (Tukey's multiple comparisons) |
|             | <b>G</b> | 408 cells, 3 embryos (111, 169, 128 cells)                                        | N/A                                                           | N/A                                                                                            | N/A                                          |
|             | <b>I</b> | 60 cells, 3 embryos (20, 20, 20 cells)                                            | N/A                                                           | N/A                                                                                            | N/A                                          |
| <b>3 S1</b> | <b>A</b> | 0-1 somite: 3 embryos<br><br>6-7 somites: 4 embryos<br><br>8-9 somites: 4 embryos | 652.5 ± 95.9 μm<br><br>494.9 ± 33.4 μm<br><br>406.5 ± 32.5 μm | 0-1 vs. 6-7:<br>p = 0.0149<br><br>0-1 vs. 8-9:<br>p = 0.0011<br><br>6-7 vs. 8-9:<br>p = 0.1236 | One-way ANOVA (Tukey's multiple comparisons) |
|             | <b>B</b> | 0-1 somite: 3 embryos<br><br>6-7 somites: 4 embryos                               | 486.5 ± 71.1 μm<br><br>425.6 ± 29.1 μm                        | 0-1 vs. 6-7:<br>p = 0.0976<br><br>0-1 vs. 8-9:<br>p = 0.1320                                   | One-way ANOVA (Tukey's multiple comparisons) |

|             |   |                                                                                                          |                                                                                                                        |                                                                                |                                                 |
|-------------|---|----------------------------------------------------------------------------------------------------------|------------------------------------------------------------------------------------------------------------------------|--------------------------------------------------------------------------------|-------------------------------------------------|
|             |   | 8-9 somites: 4 embryos                                                                                   | 427.5 ± 7.5 μm                                                                                                         | 6-7 vs. 8-9:<br>p = 0.9998                                                     |                                                 |
| <b>3 S2</b> | B | 3 embryos (50, 50, 50 cells)                                                                             | E1: 0.17 ± 1.13<br>E2: 0.60 ± 1.61<br>E3: 0.03 ± 0.99                                                                  | N/A                                                                            | N/A                                             |
| <b>4</b>    | J | WT: 4 embryos (1415, 1367, 1186, 1240 cells)<br><br><i>Ift122</i> : 4 embryos (932, 906, 935, 757 cells) | 13.63 ± 0.82 μm <sup>2</sup><br><br>21.06 ± 2.00 μm <sup>2</sup>                                                       | p=0.0024                                                                       | Welch's t-test<br><br>Does not assume equal SDs |
|             | K | WT: 5208 cells, 4 embryos<br><br><i>Ift122</i> : 3530 cells, 4 embryos                                   | N/A (D = 0.2763)                                                                                                       | p<0.0001                                                                       | Kolmogorov-Smirnov                              |
|             | L | WT: 4 embryos (1171, 1162, 1116, 1148 cells)<br><br><i>Ttc21b</i> : 3 embryos (580, 687, 613 cells)      | 15.60 ± 0.78 μm <sup>2</sup><br><br>30.05 ± 2.39 μm <sup>2</sup>                                                       | p=0.0058                                                                       | Welch's t-test<br><br>Does not assume equal SDs |
|             | M | WT: 4597 cells, 4 embryos<br><br><i>Ttc21b</i> : 1880 cells, 3 embryos                                   | N/A (D = 0.4536)                                                                                                       | p<0.0001                                                                       | Kolmogorov-Smirnov                              |
| <b>4 S4</b> | A | WT: 4 embryos (835, 1138, 1052, 990 cells)<br><br><i>Ift122</i> : 4 embryos (715, 867, 626, 563 cells)   | WT ML: 72.32 ± 2.74%<br>WT AP: 27.68 ± 2.74%<br><br><i>Ift122</i> ML: 65.14 ± 1.89%<br><i>Ift122</i> AP: 34.86 ± 1.89% | WT vs. <i>Ift122</i> ML: p = 0.0020<br><br>WT vs. <i>Ift122</i> AP: p = 0.0020 | Two-way ANOVA (Sidak's multiple comparisons)    |
|             | B | WT: 4 embryos (835, 1138, 1052, 990 cells)                                                               | 1.33 ± 0.03<br><br>1.22 ± 0.04                                                                                         | p = 0.0058                                                                     | Welch's t-test<br><br>Does not                  |

|      |   |                                                                                                 |                                                                                                                            |                                                                                                     |                                                 |
|------|---|-------------------------------------------------------------------------------------------------|----------------------------------------------------------------------------------------------------------------------------|-----------------------------------------------------------------------------------------------------|-------------------------------------------------|
|      |   | <i>Ift122</i> : 4 embryos<br>(715, 867, 626, 563 cells)                                         |                                                                                                                            |                                                                                                     | assume equal SDs                                |
|      |   |                                                                                                 |                                                                                                                            |                                                                                                     |                                                 |
|      | C | WT: 3 embryos (146, 170, 195 cells)<br><br><i>Ift122</i> : 3 embryos (372, 599, 414 cells)      | WT ML: 59.80 ± 15.49%<br>WT AP: 40.20 ± 15.49%<br><br><i>Ift122</i> ML: 65.18 ± 11.60%<br><i>Ift122</i> AP: 34.82 ± 11.60% | WT vs. <i>Ift122</i> ML: p = 0.8725<br><br>WT vs. <i>Ift122</i> AP: p = 0.8725                      | Two-way ANOVA (Sidak's multiple comparisons)    |
|      |   |                                                                                                 |                                                                                                                            |                                                                                                     |                                                 |
|      | D | WT: 3 embryos (146, 170, 195 cells)<br><br><i>Ift122</i> : 3 embryos (372, 599, 414 cells)      | 1.20 ± 0.16<br><br>1.26 ± 0.12                                                                                             | p = 0.6810                                                                                          | Welch's t-test<br><br>Does not assume equal SDs |
|      |   |                                                                                                 |                                                                                                                            |                                                                                                     |                                                 |
|      | E | WT: 4 embryos (913, 898, 870, 912 cells)<br><br><i>Ttc21b</i> : 3 embryos (415, 489, 411 cells) | WT ML: 72.36 ± 3.00%<br>WT AP: 27.64 ± 3.00%<br><br><i>Ttc21b</i> ML: 59.99 ± 6.91%<br><i>Ttc21b</i> AP: 40.01 ± 6.91%     | WT vs. <i>Ttc21b</i> ML: p = 0.0167<br><br>WT vs. <i>Ttc21b</i> AP: p = 0.0167                      | Two-way ANOVA (Sidak's multiple comparisons)    |
|      |   |                                                                                                 |                                                                                                                            |                                                                                                     |                                                 |
|      | F | WT: 4 embryos (913, 898, 870, 912 cells)<br><br><i>Ttc21b</i> : 3 embryos (415, 489, 411 cells) | 1.34 ± 0.09<br><br>1.22 ± 0.07                                                                                             | p = 0.0863                                                                                          | Welch's t-test<br><br>Does not assume equal SDs |
|      |   |                                                                                                 |                                                                                                                            |                                                                                                     |                                                 |
| 4 S5 | E | WT:<br>3 embryos                                                                                | WT 0-100: 2.34 ± 0.76 %<br><br>WT 100-200: 3.48 ± 0.50 %<br><br>WT 200-300: 4.12 ± 0.59 %<br><br>WT 300-400: 3.60 ± 0.72 % | WT vs. <i>Ift122</i><br><br>0-100: p > 0.9999<br><br>100-200: p = 0.9950<br><br>200-300: p > 0.9999 | Two-way ANOVA (Sidak's multiple comparisons)    |

|             |      |                                                                  |                                                                                                                                                                                                                                                                                                                               |                                                                                                                                            |                                                 |
|-------------|------|------------------------------------------------------------------|-------------------------------------------------------------------------------------------------------------------------------------------------------------------------------------------------------------------------------------------------------------------------------------------------------------------------------|--------------------------------------------------------------------------------------------------------------------------------------------|-------------------------------------------------|
|             |      | <i>Ift122</i> :<br>3 embryos                                     | <i>Ift122</i> 0-100:<br>2.37 ± 0.83 %<br><br><i>Ift122</i> 100-200:<br>3.67 ± 0.59 %<br><br><i>Ift122</i> 200-300:<br>4.05 ± 0.15 %<br><br><i>Ift122</i> 300-400:<br>3.62 ± 0.75 %                                                                                                                                            | 300-400:<br>p > 0.9999                                                                                                                     |                                                 |
|             | F    | WT:<br>3 embryos<br><br><i>Ttc21b</i> :<br>3 embryos             | WT 0-100:<br>3.25 ± 0.36 %<br><br>WT 100-200:<br>4.31 ± 0.48 %<br><br>WT 200-300: 4.22 ± 0.31 %<br><br>WT 300-400:<br>4.40 ± 0.38 %<br><br><i>Ttc21b</i> 0-100:<br>2.78 ± 0.29 %<br><br><i>Ttc21b</i> 100-200:<br>4.52 ± 0.16 %<br><br><i>Ttc21b</i> 200-300:<br>4.25 ± 0.26 %<br><br><i>Ttc21b</i> 300-400:<br>4.18 ± 0.90 % | WT vs. <i>Ttc21b</i><br><br>0-100:<br>p = 0.6082<br><br>100-200:<br>p = 0.9633<br><br>200-300:<br>p > 0.9999<br><br>300-400:<br>p > 0.9618 | Two-way ANOVA (Sidak's multiple comparisons)    |
| <b>4 S6</b> | B    | WT: 3 embryos<br><br><i>Ttc21b</i> : 3 embryos                   | 77.00 ± 5.57 cells<br><br>75.33 ± 5.13 cells                                                                                                                                                                                                                                                                                  | p = 0.7225                                                                                                                                 | Welch's t-test<br><br>Does not assume equal SDs |
| <b>5</b>    | C, D | WT lateral: 4 embryos (data from Figure 4K)<br><br>WT midline: 3 | N/A                                                                                                                                                                                                                                                                                                                           | N/A                                                                                                                                        | N/A                                             |

|  |   |                                                                                                                                                                                                                            |                                                                                                                                                                                                                    |                                                                                                                                                                                                                                                                                                                    |                                                                                                             |
|--|---|----------------------------------------------------------------------------------------------------------------------------------------------------------------------------------------------------------------------------|--------------------------------------------------------------------------------------------------------------------------------------------------------------------------------------------------------------------|--------------------------------------------------------------------------------------------------------------------------------------------------------------------------------------------------------------------------------------------------------------------------------------------------------------------|-------------------------------------------------------------------------------------------------------------|
|  |   | embryos (276, 316, 285 cells)<br><br><i>Ift122</i> lateral: 4 embryos (data from Figure 4K)<br><br><i>Ift122</i> midline: 3 embryos (516, 441, 539 cells)                                                                  |                                                                                                                                                                                                                    |                                                                                                                                                                                                                                                                                                                    |                                                                                                             |
|  |   |                                                                                                                                                                                                                            |                                                                                                                                                                                                                    |                                                                                                                                                                                                                                                                                                                    |                                                                                                             |
|  | E | WT lateral: 4 embryos (data from Figure 4J)<br><br>WT midline: 3 embryos (276, 316, 285 cells)<br><br><i>Ift122</i> lateral: 4 embryos (data from Figure 4J)<br><br><i>Ift122</i> midline: 3 embryos (516, 441, 539 cells) | WT:<br>lateral:<br>$13.63 \pm 0.82 \mu\text{m}^2$<br>midline:<br>$32.45 \pm 2.18 \mu\text{m}^2$<br><br><i>Ift122</i> :<br>lateral:<br>$21.06 \pm 2.00 \mu\text{m}^2$<br>midline:<br>$19.23 \pm 2.37 \mu\text{m}^2$ | WT lat vs. WT mid:<br>$p = 0.0149$<br><br><i>Ift122</i> lat vs. <i>Ift122</i> mid:<br>$p = 0.8383$<br><br>WT lat vs. <i>Ift122</i> lat:<br>$p = 0.0100$<br><br>WT lat vs. <i>Ift122</i> mid:<br>$p = 0.1723$<br><br>WT mid vs. <i>Ift122</i> lat:<br>$p = 0.0091$<br>WT mid vs. <i>Ift122</i> mid:<br>$p = 0.0090$ | Brown-Forsythe and Welch One-way ANOVA (Dunnett's T3 multiple comparisons)<br><br>Does not assume equal SDs |
|  |   |                                                                                                                                                                                                                            |                                                                                                                                                                                                                    |                                                                                                                                                                                                                                                                                                                    |                                                                                                             |
|  | G | WT: 3 embryos<br><i>Ift122</i> : 3 embryos                                                                                                                                                                                 | N/A                                                                                                                                                                                                                | N/A                                                                                                                                                                                                                                                                                                                | N/A                                                                                                         |
|  |   |                                                                                                                                                                                                                            |                                                                                                                                                                                                                    |                                                                                                                                                                                                                                                                                                                    |                                                                                                             |
|  | H | WT: 3 embryos<br><i>Ttc21b</i> : 3 embryos                                                                                                                                                                                 | N/A                                                                                                                                                                                                                | N/A                                                                                                                                                                                                                                                                                                                | N/A                                                                                                         |
|  |   |                                                                                                                                                                                                                            |                                                                                                                                                                                                                    |                                                                                                                                                                                                                                                                                                                    |                                                                                                             |
|  | I | WT (lateral and midline): 3 embryos                                                                                                                                                                                        | WT:<br>lateral:<br>$59.80 \pm 1.90 \mu\text{m}$<br>midline:<br>$26.63 \pm 2.97 \mu\text{m}$                                                                                                                        | WT lat vs. WT mid:<br>$p = 0.0019$<br><br><i>Ift122</i> lat vs. <i>Ift122</i> mid:<br>$p = 0.4142$                                                                                                                                                                                                                 | Brown-Forsythe and Welch One-way ANOVA (Dunnett's T3 multiple comparisons)                                  |

|             |          |                                                |                                                                                                                                                            |                                                                                                                                                                                                                                                                                         |                                                                                                             |
|-------------|----------|------------------------------------------------|------------------------------------------------------------------------------------------------------------------------------------------------------------|-----------------------------------------------------------------------------------------------------------------------------------------------------------------------------------------------------------------------------------------------------------------------------------------|-------------------------------------------------------------------------------------------------------------|
|             |          | <i>lft122</i> (lateral and midline): 3 embryos | <i>lft122</i> :<br>lateral:<br>51.13 ± 1.10 μm<br>midline:<br>45.81 ± 3.96 μm                                                                              | WT lat vs.<br><i>lft122</i> lat:<br>p = 0.0239<br><br>WT lat vs.<br><i>lft122</i> mid:<br>p = 0.0433<br><br>WT mid vs.<br><i>lft122</i> lat:<br>p = 0.0034<br><br>WT mid vs.<br><i>lft122</i> mid:<br>p = 0.0111                                                                        | Does not assume equal SDs                                                                                   |
| <b>5 S1</b> | <b>B</b> | WT: 3 embryos<br><br><i>Ttc21b</i> : 3 embryos | WT lateral: 44.77 ± 2.66 μm<br><br>WT midline: 21.40 ± 3.06 μm<br><br><i>Ttc21b</i> lateral: 48.44 ± 3.32 μm<br><br><i>Ttc21b</i> midline: 44.91 ± 6.12 μm | WT lat vs. WT mid: p = 0.0025<br><br>WT lat vs <i>Ttc21b</i> lat: p = 0.6285<br><br>WT lat vs. <i>Ttc21b</i> mid: p > 0.9999<br><br>WT mid vs. <i>Ttc21b</i> lat: p = 0.0021<br><br>WT mid vs. <i>Ttc21b</i> mid: p = 0.0352<br><br><i>Ttc21b</i> lat vs. <i>Ttc21b</i> mid: p = 0.9140 | Brown-Forsythe and Welch One-way ANOVA (Dunnett's T3 multiple comparisons)<br><br>Does not assume equal SDs |
|             | <b>C</b> | WT: 3 embryos<br><br><i>Ttc21b</i> : 3 embryos | 420.0 ± 24.2 μm<br><br>601.3 ± 44.1 μm                                                                                                                     | p = 0.0075                                                                                                                                                                                                                                                                              | Welch's t-test<br><br>Does not assume equal SDs                                                             |
|             | <b>D</b> | WT: 3 embryos                                  | 1.00 ± 0.04                                                                                                                                                | p = 0.0076                                                                                                                                                                                                                                                                              | Welch's t-test                                                                                              |



|   |                     |                                                                            |                                                                   |                 |                                                      |
|---|---------------------|----------------------------------------------------------------------------|-------------------------------------------------------------------|-----------------|------------------------------------------------------|
|   |                     | <i>Ttc21b</i> : 3 embryos                                                  | 1.16 ± 0.04                                                       |                 | Does not assume equal SDs                            |
|   |                     |                                                                            |                                                                   |                 |                                                      |
|   | E                   | WT: 3 embryos<br><i>Ift122</i> : 3 embryos                                 | 313.3 ± 14.2 μm<br>387.0 ± 47.9 μm                                | p = 0.1065      | Welch's t-test<br><br>Does not assume equal SDs      |
|   |                     |                                                                            |                                                                   |                 |                                                      |
|   | F                   | WT: 3 embryos<br><i>Ift122</i> : 3 embryos                                 | 0.66 ± 0.07<br>0.92 ± 0.11                                        | p = 0.0314      | Welch's t-test<br><br>Does not assume equal SDs      |
|   |                     |                                                                            |                                                                   |                 |                                                      |
| 6 | B ( <i>Ift122</i> ) | WT:<br>86 cables, 3 embryos<br><br><i>Ift122</i> :<br>36 cables, 3 embryos | WT circular mean: 24.2°<br><br><i>Ift122</i> circular mean: 41.5° | P < 0.05        | Watson nonparametric two-sample test for homogeneity |
|   |                     |                                                                            |                                                                   |                 |                                                      |
|   | B ( <i>Ttc21b</i> ) | WT:<br>84 cables, 3 embryos<br><br><i>Ttc21b</i> :<br>29 cables, 3 embryos | WT circular mean: 26.4°<br><br><i>Ttc21b</i> circular mean: 44.3° | 0.05 < P < 0.10 | Watson nonparametric two-sample test for homogeneity |
|   |                     |                                                                            |                                                                   |                 |                                                      |
|   | C ( <i>Ift122</i> ) | WT:<br>3 embryos<br><br><i>Ift122</i> :<br>3 embryos                       | 28.67 ± 6.11 cables<br><br>12.33 ± 3.06 cables                    | p = 0.0266      | Welch's t-test<br><br>Does not assume equal SDs      |
|   |                     |                                                                            |                                                                   |                 |                                                      |
|   | C ( <i>Ttc21b</i> ) | WT:<br>3 embryos<br><br><i>Ttc21b</i> :<br>3 embryos                       | 28.0 ± 1.7 cables<br><br>9.7 ± 5.0 cables                         | p = 0.0160      | Welch's t-test<br><br>Does not assume equal SDs      |
|   |                     |                                                                            |                                                                   |                 |                                                      |
|   | D ( <i>Ift122</i> ) | WT:<br>3 embryos<br><br><i>Ift122</i> :<br>3 embryos                       | 50.7 ± 9.3 cables<br><br>33.3 ± 4.0 cables                        | p = 0.06668     | Welch's t-test<br><br>Does not assume equal SDs      |
|   |                     |                                                                            |                                                                   |                 |                                                      |

|          |                     |                                                                                                                       |                                                                   |            |                                                      |
|----------|---------------------|-----------------------------------------------------------------------------------------------------------------------|-------------------------------------------------------------------|------------|------------------------------------------------------|
|          | D ( <i>Ttc21b</i> ) | WT:<br>3 embryos<br><br><i>Ttc21b</i> :<br>3 embryos                                                                  | 43.4 ± 3.8 cables<br><br>33.7 ± 4.2 cables                        | p = 0.0414 | Welch's t-test<br><br>Does not assume equal SDs      |
|          | F ( <i>Ift122</i> ) | WT:<br>151 cables, 3 embryos<br><br><i>Ift122</i> :<br>100 cables, 3 embryos                                          | WT circular mean: 34.7°<br><br><i>Ift122</i> circular mean: 45.9° | P < 0.01   | Watson nonparametric two-sample test for homogeneity |
|          | F ( <i>Ttc21b</i> ) | WT:<br>130 cables, 3 embryos<br><br><i>Ttc21b</i> :<br>101 cables, 3 embryos                                          | WT circular mean: 28.8°<br><br><i>Ttc21b</i> circular mean: 40.8° | P < 0.001  | Watson nonparametric two-sample test for homogeneity |
|          | G ( <i>Ift122</i> ) | WT: 3 embryos (50, 50, 50 cells)<br><br><i>Ift122</i> : 3 embryos (50, 50, 50 cells)                                  | N/A                                                               | N/A        | N/A                                                  |
|          | H ( <i>Ttc21b</i> ) | WT: 3 embryos (50, 50, 50 cells)<br><br><i>Ttc21b</i> : 3 embryos (50, 50, 50 cells)                                  | N/A                                                               | N/A        | N/A                                                  |
| <b>7</b> | B                   | WT: 3 embryos<br><br><i>Ift122</i> : 3 embryos                                                                        | N/A                                                               | N/A        | N/A                                                  |
|          | C                   | WT: 3 embryos<br><br><i>Ttc21b</i> : 3 embryos                                                                        | N/A                                                               | N/A        | N/A                                                  |
| <b>8</b> | B, C                | WT: 5 embryos (1129, 1011, 1047, 1269, 1105 cells)<br><br><i>Gli2</i> : 5 embryos (1075, 967, 1067, 1017, 1097 cells) | 17.39 ± 0.78 μm <sup>2</sup><br><br>16.96 ± 1.57 μm <sup>2</sup>  | p = 0.6069 | Welch's t-test<br><br>Does not assume equal SDs      |

|     |      |                                                                                                                           |                                                                                                                                                                    |                                                                                                                                                                                                                                                                                                |                                                                                                                                       |
|-----|------|---------------------------------------------------------------------------------------------------------------------------|--------------------------------------------------------------------------------------------------------------------------------------------------------------------|------------------------------------------------------------------------------------------------------------------------------------------------------------------------------------------------------------------------------------------------------------------------------------------------|---------------------------------------------------------------------------------------------------------------------------------------|
|     | E, F | WT: 5 embryos<br>(233, 220, 161, 342,<br>310 cells)<br><br><i>Gli2</i> : 5 embryos<br>(228, 257, 277, 171,<br>174 cells)  | 47.66 ± 7.20 μm <sup>2</sup><br><br>32.24 ± 5.98 μm <sup>2</sup>                                                                                                   | p = 0.0066                                                                                                                                                                                                                                                                                     | Welch's t-test<br><br>Does not<br>assume equal<br>SDs                                                                                 |
|     |      |                                                                                                                           |                                                                                                                                                                    |                                                                                                                                                                                                                                                                                                |                                                                                                                                       |
|     | H    | WT: 5 embryos<br><br><i>Gli2</i> : 5 embryos                                                                              | WT lateral:<br>59.54 ± 2.14 μm<br><br>WT midline:<br>29.90 ± 1.80 μm<br><br><i>Gli2</i> lateral:<br>57.37 ± 5.95 μm<br><br><i>Gli2</i> midline:<br>50.01 ± 3.04 μm | WT lat vs. WT<br>mid: p < 0.0001<br><br>WT lat vs. <i>Gli2</i><br>lat: p = 0.9555<br><br>WT lat vs. <i>Gli2</i><br>mid: p = 0.0038<br><br>WT mid vs. <i>Gli2</i><br>lat: p = 0.0009<br><br>WT mid vs. <i>Gli2</i><br>mid: p < 0.0001<br><br><i>Gli2</i> lat vs. <i>Gli2</i><br>mid: p = 0.2100 | Brown-<br>Forsythe and<br>Welch One-<br>way ANOVA<br>(Dunnett's T3<br>multiple<br>comparisons)<br><br>Does not<br>assume equal<br>SDs |
|     |      |                                                                                                                           |                                                                                                                                                                    |                                                                                                                                                                                                                                                                                                |                                                                                                                                       |
| 8S2 | A    | WT: 5 embryos<br>(903, 796, 823, 792,<br>860 cells)<br><br><i>Gli2</i> : 5 embryos<br>(1023, 867, 831, 738,<br>836 cells) | WT ML:<br>74.76 ± 5.95%<br>WT AP:<br>25.24 ± 5.95%<br><br><i>Gli2</i> ML:<br>71.73 ± 7.47%<br><i>Gli2</i> AP:<br>28.63 ± 7.47%                                     | WT vs. <i>Gli2</i> ML:<br>p = 0.6853<br><br>WT vs. <i>Gli2</i> AP:<br>p = 0.6853                                                                                                                                                                                                               | Two-way<br>ANOVA<br>(Sidak's<br>multiple<br>comparisons)                                                                              |
|     |      |                                                                                                                           |                                                                                                                                                                    |                                                                                                                                                                                                                                                                                                |                                                                                                                                       |
|     | B    | WT: 5 embryos<br>(903, 796, 823, 792,<br>860 cells)<br><br><i>Gli2</i> : 5 embryos<br>(1023, 867, 831, 738,<br>836 cells) | 1.31 ± 0.10<br><br>1.27 ± 0.13                                                                                                                                     | p = 0.6079                                                                                                                                                                                                                                                                                     | Welch's t-test<br><br>Does not<br>assume equal<br>SDs                                                                                 |
|     |      |                                                                                                                           |                                                                                                                                                                    |                                                                                                                                                                                                                                                                                                |                                                                                                                                       |
|     | C    | WT: 5 embryos<br>(260, 173, 88, 105, 100<br>cells)                                                                        | WT ML:<br>66.59 ± 12.01%                                                                                                                                           | WT vs. <i>Gli2</i><br>ML: p = 0.9991                                                                                                                                                                                                                                                           | Two-way<br>ANOVA<br>(Sidak's                                                                                                          |

|      |   |                                                                                                                      |                                                                                                        |                                      |                                                       |
|------|---|----------------------------------------------------------------------------------------------------------------------|--------------------------------------------------------------------------------------------------------|--------------------------------------|-------------------------------------------------------|
|      |   | <i>Gli2</i> : 5 embryos<br>(244, 325, 180, 177,<br>146 cells)                                                        | WT AP:<br>33.41 ± 12.01%<br><br><i>Gli2</i> ML:<br>66.99 ± 20.28%<br><i>Gli2</i> AP:<br>33.01 ± 20.28% | WT vs. <i>Gli2</i><br>AP: p = 0.9991 | multiple<br>comparisons)                              |
|      |   |                                                                                                                      |                                                                                                        |                                      |                                                       |
|      | D | WT: 5 embryos (260,<br>173, 88, 105, 100 cells)<br><br><i>Gli2</i> : 5 embryos (244,<br>325, 180, 177, 146<br>cells) | 1.31 ± 0.20<br><br>1.38 ± 0.37                                                                         | p = 0.7324                           | Welch's t-test<br><br>Does not<br>assume equal<br>SDs |
|      |   |                                                                                                                      |                                                                                                        |                                      |                                                       |
| 9    | H | control: 3 embryos<br>(1140, 1104, 1395<br>cells)<br><br>Wnt1-Cre2 > SmoM2:<br>3 embryos (763, 867,<br>723 cells)    | 15.15 ± 1.61 μm <sup>2</sup><br><br>22.69 ± 2.07 μm <sup>2</sup>                                       | p = 0.0089                           | Welch's t-test<br><br>Does not<br>assume equal<br>SDs |
|      |   |                                                                                                                      |                                                                                                        |                                      |                                                       |
|      | I | control:<br>3639 cells, 3 embryos<br><br>Wnt1-Cre2 > SmoM2:<br>2353 cells, 3 embryos                                 | N/A (D = 0.3002)                                                                                       | p < 0.0001                           | Kolmogorov-<br>Smirnov                                |
|      |   |                                                                                                                      |                                                                                                        |                                      |                                                       |
|      | J | control: 3 embryos<br>(225, 183, 189 cells)<br><br>Wnt1-Cre2 > SmoM2:<br>3 embryos (188, 176,<br>224 cells)          | 43.76 ± 4.85 μm <sup>2</sup><br><br>43.56 ± 3.81 μm <sup>2</sup>                                       | p = 0.9556                           | Welch's t-test<br><br>Does not<br>assume equal<br>SDs |
|      |   |                                                                                                                      |                                                                                                        |                                      |                                                       |
|      | K | control:<br>597 cells, 3 embryos<br><br>Wnt1-Cre2 > SmoM2:<br>588 cells, 3 embryos                                   | N/A (D = 0.0320)                                                                                       | p = 0.9215                           | Kolmogorov-<br>Smirnov                                |
|      |   |                                                                                                                      |                                                                                                        |                                      |                                                       |
| 9 S1 | B | control:<br>4 embryos<br><br>Wnt1-Cre2 > SmoM2:<br>4 embryos                                                         | 3.73 ± 0.38 %<br><br>3.64 ± 0.44 %                                                                     | p = 0.7798                           | Welch's t-test<br><br>Does not<br>assume equal<br>SDs |

|            |          |                                              |                                                                |                                        |                                                          |
|------------|----------|----------------------------------------------|----------------------------------------------------------------|----------------------------------------|----------------------------------------------------------|
| <b>9S2</b> | <b>A</b> | control: 3 embryos<br>(887, 912, 1132 cells) | control ML:<br>69.99 ± 3.13%<br>control AP:<br>30.01 ± 3.13%   | control vs.<br>SmoM2 ML:<br>p = 0.9519 | Two-way<br>ANOVA<br>(Sidak's<br>multiple<br>comparisons) |
|            |          | SmoM2: 3 embryos<br>(567, 655, 753 cells)    | SmoM2 ML:<br>69.19 ± 3.72%<br>SmoM2 AP:<br>30.81 ± 3.72%       | control vs.<br>SmoM2 AP:<br>p = 0.9519 |                                                          |
|            | <b>B</b> | control: 3 embryos<br>(887, 912, 1132 cells) | 1.29 ± 0.05                                                    | p = 0.9359                             | Welch's t-test                                           |
|            |          | SmoM2: 3 embryos<br>(567, 655, 753 cells)    | 1.29 ± 0.60                                                    |                                        | Does not<br>assume equal<br>SDs                          |
|            | <b>C</b> | control: 3 embryos<br>(85, 143, 125 cells)   | control ML: 66.77<br>± 14.70%<br>control AP: 33.23<br>± 14.70% | control vs<br>SmoM2<br>ML: p = 0.9983  | Two-way<br>ANOVA<br>(Sidak's<br>multiple<br>comparisons) |
|            |          | SmoM2: 3 embryos<br>(146, 78, 144 cells)     | SmoM2 ML:<br>66.01 ± 19.55%<br>SmoM2 AP: 33.99<br>± 19.55%     | control vs<br>SmoM2 AP:<br>p = 0.9983  |                                                          |
|            | <b>D</b> | control: 3 embryos<br>(85, 143, 125 cells)   | 1.31 ± 0.20                                                    | p = 0.7324                             | Welch's t-test                                           |
|            |          | SmoM2: 3 embryos<br>(146, 78, 144 cells)     | 1.38 ± 0.37                                                    |                                        | Does not<br>assume equal<br>SDs                          |
